# Supplementary material for: Genetic variation at 11q23.1 confers colorectal cancer risk by dysregulation of colonic tuft cell transcriptional activator POU2AF2
Source: bioRxiv preprint, doi:10.1101/2023.08.24.554659, version 1 (2023-08-25)
Supplement: Supplementary Material S1 [file 554659_file04.xlsx]

## Sheet: POU2AF2_cis-eQTLs
snps	gene	statistic	pvalue	FDR	beta	marker	rsid	REF	ALT	markerID	chr	nAllele	Count	Frequency	POS
chr11_111296832_A_C_b38	ENSG00000150750	11.7427	3.14695e-27	3.11258e-23	0.761037	chr11:111296832	rs6589218	A	C	11:111296832_A/C	11	734	252	0.343324	111296832
chr11_111297051_C_G_b38	ENSG00000150750	11.7427	3.14695e-27	3.11258e-23	0.761037	chr11:111297051	rs7944895	C	G	11:111297051_C/G	11	734	252	0.343324	111297051
chr11_111300019_C_T_b38	ENSG00000150750	11.7427	3.14695e-27	3.11258e-23	0.761037	chr11:111300019	rs7105857	C	T	11:111300019_C/T	11	734	252	0.343324	111300019
chr11_111295779_G_A_b38	ENSG00000150750	11.4802	2.9627e-26	2.83876e-22	0.745836	chr11:111295779	rs12296076	G	A	11:111295779_G/A	11	734	254	0.346049	111295779
chr11_111299265_T_C_b38	ENSG00000150750	11.4675	3.30032e-26	3.06643e-22	0.768384	chr11:111299265	rs11213823	T	C	11:111299265_T/C	11	734	243	0.331063	111299265
chr11_111300346_T_C_b38	ENSG00000150750	11.3663	7.7775e-26	5.81632e-22	0.766509	chr11:111300346	rs7122375	T	C	11:111300346_T/C	11	734	234	0.318801	111300346
chr11_111300921_T_G_b38	ENSG00000150750	11.3663	7.7775e-26	5.81632e-22	0.766509	chr11:111300921	rs3802840	T	G	11:111300921_T/G	11	734	234	0.318801	111300921
chr11_111300947_G_T_b38	ENSG00000150750	11.3663	7.7775e-26	5.81632e-22	0.766509	chr11:111300947	rs3802841	G	T	11:111300947_G/T	11	734	234	0.318801	111300947
chr11_111300984_C_A_b38	ENSG00000150750	11.3663	7.7775e-26	5.81632e-22	0.766509	chr11:111300984	rs3802842	C	A	11:111300984_C/A	11	734	234	0.318801	111300984
chr11_111301454_T_C_b38	ENSG00000150750	11.3663	7.7775e-26	5.81632e-22	0.766509	chr11:111301454	rs4608113	T	C	11:111301454_T/C	11	734	234	0.318801	111301454
chr11_111301485_A_G_b38	ENSG00000150750	11.3663	7.7775e-26	5.81632e-22	0.766509	chr11:111301485	rs4520624	A	G	11:111301485_A/G	11	734	234	0.318801	111301485
chr11_111301511_ATGTGCAATG_A_b38	ENSG00000150750	11.3663	7.7775e-26	5.81632e-22	0.766509	chr11:111301511	chr11:111301511	ATGTGCAATG	A	11:111301511_ATGTGCAATG/A	11	734	234	0.318801	111301511
chr11_111301678_T_C_b38	ENSG00000150750	11.3663	7.7775e-26	5.81632e-22	0.766509	chr11:111301678	rs10789823	T	C	11:111301678_T/C	11	734	234	0.318801	111301678
chr11_111286111_T_C_b38	ENSG00000150750	11.3089	1.26282e-25	9.21903e-22	0.774568	chr11:111286111	rs3087967	T	C	11:111286111_T/C	11	734	228	0.310627	111286111
chr11_111299815_A_G_b38	ENSG00000150750	11.2905	1.47584e-25	1.05236e-21	0.775522	chr11:111299815	rs10891246	A	G	11:111299815_A/G	11	734	231	0.314714	111299815
chr11_111302186_G_C_b38	ENSG00000150750	11.2336	2.38355e-25	1.66098e-21	0.739995	chr11:111302186	rs6589219	G	C	11:111302186_G/C	11	734	245	0.333787	111302186
chr11_111286502_T_TAAAAC_b38	ENSG00000150750	11.179	3.76819e-25	2.56751e-21	0.757121	chr11:111286502	rs71461518	T	TAAAAC	11:111286502_T/TAAAAC	11	734	234	0.318801	111286502
chr11_111269214_A_AC_b38	ENSG00000150750	11.1206	6.14939e-25	4.09852e-21	0.736691	chr11:111269214	rs59942963,rs77037348	A	AC	11:111269214_A/AC	11	734	242	0.3297	111269214
chr11_111302565_C_T_b38	ENSG00000150750	11.1181	6.2825e-25	4.09852e-21	0.735061	chr11:111302565	rs6589220	C	T	11:111302565_C/T	11	734	246	0.33515	111302565
chr11_111290028_C_T_b38	ENSG00000150750	11.093	7.74566e-25	4.74986e-21	0.749382	chr11:111290028	rs4477469	C	T	11:111290028_C/T	11	734	236	0.321526	111290028
chr11_111291966_A_G_b38	ENSG00000150750	11.093	7.74566e-25	4.74986e-21	0.749382	chr11:111291966	rs10789822	A	G	11:111291966_A/G	11	734	236	0.321526	111291966
chr11_111294284_C_T_b38	ENSG00000150750	11.093	7.74566e-25	4.74986e-21	0.749382	chr11:111294284	rs7103178	C	T	11:111294284_C/T	11	734	236	0.321526	111294284
chr11_111283347_A_C_b38	ENSG00000150750	11.0524	1.08788e-24	6.41459e-21	0.749431	chr11:111283347	rs7130173	A	C	11:111283347_A/C	11	734	232	0.316076	111283347
chr11_111269318_C_G_b38	ENSG00000150750	11.0532	1.08031e-24	6.41459e-21	0.723247	chr11:111269318	rs4548657	C	G	11:111269318_C/G	11	734	246	0.33515	111269318
chr11_111269217_C_T_b38	ENSG00000150750	11.0393	1.21313e-24	7.01815e-21	0.723291	chr11:111269217	rs36029541	C	T	11:111269217_C/T	11	734	247	0.336512	111269217
chr11_111289766_T_C_b38	ENSG00000150750	10.9151	3.41125e-24	1.83498e-20	0.741004	chr11:111289766	rs11213820	T	C	11:111289766_T/C	11	734	237	0.322888	111289766
chr11_111281771_C_G_b38	ENSG00000150750	10.8288	6.96711e-24	3.56036e-20	0.712877	chr11:111281771	rs1987128	C	G	11:111281771_C/G	11	734	247	0.336512	111281771
chr11_111272783_A_G_b38	ENSG00000150750	10.8127	7.95662e-24	3.99936e-20	0.72867	chr11:111272783	rs10891241	A	G	11:111272783_A/G	11	734	233	0.317439	111272783
chr11_111265020_A_G_b38	ENSG00000150750	9.40272	6.01688e-19	1.0557e-15	0.647267	chr11:111265020	rs11213809	A	G	11:111265020_A/G	11	734	229	0.311989	111265020
chr11_111254787_G_A_b38	ENSG00000150750	9.35343	8.76848e-19	1.47722e-15	0.645018	chr11:111254787	rs2001754	G	A	11:111254787_G/A	11	734	230	0.313351	111254787
chr11_111262280_C_T_b38	ENSG00000150750	9.13664	4.53126e-18	7.27941e-15	0.602575	chr11:111262280	rs7116087	C	T	11:111262280_C/T	11	734	262	0.356948	111262280
chr11_111248969_T_C_b38	ENSG00000150750	-8.21126	3.82484e-15	4.69099e-12	-0.618811	chr11:111248969	rs11213801	T	C	11:111248969_T/C	11	734	196	0.26703	111248969
chr11_111249973_C_T_b38	ENSG00000150750	-8.21126	3.82484e-15	4.69099e-12	-0.618811	chr11:111249973	rs10891239	C	T	11:111249973_C/T	11	734	196	0.26703	111249973
chr11_111265875_T_TA_b38	ENSG00000150750	7.19468	3.58134e-12	3.36837e-09	0.536284	chr11:111265875	rs201448592	T	TA	11:111265875_T/TA	11	734	301	0.410082	111265875
chr11_111286858_AT_A_b38	ENSG00000150750	6.35845	6.09288e-10	4.10585e-07	0.489662	chr11:111286858	chr11:111286858	AT	A	11:111286858_AT/A	11	734	276	0.376022	111286858
chr11_111301339_C_G_b38	ENSG00000150750	5.92912	7.06305e-09	3.8603e-06	0.464729	chr11:111301339	rs12575395	C	G	11:111301339_C/G	11	734	169	0.230245	111301339
chr11_111303258_GAC_G_b38	ENSG00000150750	5.92912	7.06305e-09	3.8603e-06	0.464729	chr11:111303258	rs3833764	GAC	G	11:111303258_GAC/G	11	734	169	0.230245	111303258
chr11_111304031_C_A_b38	ENSG00000150750	5.92912	7.06305e-09	3.8603e-06	0.464729	chr11:111304031	rs7123095	C	A	11:111304031_C/A	11	734	169	0.230245	111304031
chr11_111268350_A_G_b38	ENSG00000150750	5.9185	7.4919e-09	4.02298e-06	0.467475	chr11:111268350	rs9633936	A	G	11:111268350_A/G	11	734	167	0.22752	111268350
chr11_111269737_A_G_b38	ENSG00000150750	5.9185	7.4919e-09	4.02298e-06	0.467475	chr11:111269737	rs10891240	A	G	11:111269737_A/G	11	734	167	0.22752	111269737
chr11_111271053_T_C_b38	ENSG00000150750	5.9185	7.4919e-09	4.02298e-06	0.467475	chr11:111271053	rs34926143	T	C	11:111271053_T/C	11	734	167	0.22752	111271053
chr11_111275991_T_C_b38	ENSG00000150750	5.9185	7.4919e-09	4.02298e-06	0.467475	chr11:111275991	rs10789821	T	C	11:111275991_T/C	11	734	167	0.22752	111275991
chr11_111289670_G_A_b38	ENSG00000150750	5.89026	8.75964e-09	4.65481e-06	0.465918	chr11:111289670	rs12577869	G	A	11:111289670_G/A	11	734	164	0.223433	111289670
chr11_111281538_ACT_A_b38	ENSG00000150750	5.88252	9.14226e-09	4.84135e-06	0.461524	chr11:111281538	chr11:111281538	ACT	A	11:111281538_ACT/A	11	734	168	0.228883	111281538
chr11_111281664_G_T_b38	ENSG00000150750	5.88252	9.14226e-09	4.84135e-06	0.461524	chr11:111281664	rs4636709	G	T	11:111281664_G/T	11	734	168	0.228883	111281664
chr11_111246412_A_T_b38	ENSG00000150750	5.85623	1.05671e-08	5.51964e-06	0.484305	chr11:111246412	rs12803934	A	T	11:111246412_A/T	11	734	150	0.20436	111246412
chr11_111255290_C_G_b38	ENSG00000150750	5.83374	1.19566e-08	6.21364e-06	0.474177	chr11:111255290	rs11213803	C	G	11:111255290_C/G	11	734	154	0.209809	111255290
chr11_111250395_C_T_b38	ENSG00000150750	5.79175	1.50432e-08	7.76508e-06	0.476826	chr11:111250395	rs7939539	C	T	11:111250395_C/T	11	734	147	0.200272	111250395
chr11_111246759_T_C_b38	ENSG00000150750	5.78427	1.5669e-08	8.07454e-06	0.469956	chr11:111246759	rs11213798	T	C	11:111246759_T/C	11	734	156	0.212534	111246759
chr11_111252970_A_G_b38	ENSG00000150750	5.77398	1.65716e-08	8.51101e-06	0.470012	chr11:111252970	rs11213802	A	G	11:111252970_A/G	11	734	153	0.208447	111252970
chr11_111253762_T_C_b38	ENSG00000150750	5.77398	1.65716e-08	8.51101e-06	0.470012	chr11:111253762	rs1986684	T	C	11:111253762_T/C	11	734	153	0.208447	111253762
chr11_111266084_C_T_b38	ENSG00000150750	5.73782	2.01653e-08	1.0305e-05	0.450876	chr11:111266084	rs11213811	C	T	11:111266084_C/T	11	734	170	0.231608	111266084
chr11_111248595_A_G_b38	ENSG00000150750	5.72443	2.16802e-08	1.09875e-05	0.465758	chr11:111248595	rs11213800	A	G	11:111248595_A/G	11	734	155	0.211172	111248595
chr11_111309665_C_A_b38	ENSG00000150750	-5.72444	2.16781e-08	1.09875e-05	-0.440715	chr11:111309665	rs11213825	C	A	11:111309665_C/A	11	734	213	0.290191	111309665
chr11_111309906_T_A_b38	ENSG00000150750	-5.72444	2.16781e-08	1.09875e-05	-0.440715	chr11:111309906	rs7933961	T	A	11:111309906_T/A	11	734	213	0.290191	111309906
chr11_111245075_T_TA_b38	ENSG00000150750	5.70422	2.41782e-08	1.22233e-05	0.415489	chr11:111245075	rs28595215	T	TA	11:111245075_T/TA	11	734	214	0.291553	111245075
chr11_111382943_A_AGT_b38	ENSG00000150750	-5.63651	3.47649e-08	1.73324e-05	-0.411512	chr11:111382943	chr11:111382943	A	AGT	11:111382943_A/AGT	11	734	312	0.425068	111382943
chr11_111261286_CACACACAT_C_b38	ENSG00000150750	5.50543	6.95478e-08	3.35288e-05	0.464751	chr11:111261286	chr11:111261286	CACACACAT	C	11:111261286_CACACACAT/C	11	734	150	0.20436	111261286
chr11_111305626_C_T_b38	ENSG00000150750	5.46049	8.79516e-08	4.15519e-05	0.424329	chr11:111305626	rs12792445	C	T	11:111305626_C/T	11	734	179	0.243869	111305626
chr11_111293388_C_A_b38	ENSG00000150750	5.41631	1.10614e-07	5.16221e-05	0.421122	chr11:111293388	rs56160097	C	A	11:111293388_C/A	11	734	180	0.245232	111293388
chr11_111297067_T_G_b38	ENSG00000150750	5.41631	1.10614e-07	5.16221e-05	0.421122	chr11:111297067	rs10891245	T	G	11:111297067_T/G	11	734	180	0.245232	111297067
chr11_111310405_A_G_b38	ENSG00000150750	-5.39329	1.24579e-07	5.66321e-05	-0.412192	chr11:111310405	rs7947849	A	G	11:111310405_A/G	11	734	215	0.292916	111310405
chr11_111289904_A_C_b38	ENSG00000150750	5.37333	1.38063e-07	6.15292e-05	0.420916	chr11:111289904	rs17092444	A	C	11:111289904_A/C	11	734	178	0.242507	111289904
chr11_111292165_A_T_b38	ENSG00000150750	5.37333	1.38063e-07	6.15292e-05	0.420916	chr11:111292165	rs4356266	A	T	11:111292165_A/T	11	734	178	0.242507	111292165
chr11_111293072_A_G_b38	ENSG00000150750	5.37333	1.38063e-07	6.15292e-05	0.420916	chr11:111293072	rs78234435	A	G	11:111293072_A/G	11	734	178	0.242507	111293072
chr11_111293926_T_C_b38	ENSG00000150750	5.37333	1.38063e-07	6.15292e-05	0.420916	chr11:111293926	rs11213821	T	C	11:111293926_T/C	11	734	178	0.242507	111293926
chr11_111295215_G_T_b38	ENSG00000150750	5.37333	1.38063e-07	6.15292e-05	0.420916	chr11:111295215	rs10891244	G	T	11:111295215_G/T	11	734	178	0.242507	111295215
chr11_111298042_C_T_b38	ENSG00000150750	5.37333	1.38063e-07	6.15292e-05	0.420916	chr11:111298042	rs7127721	C	T	11:111298042_C/T	11	734	178	0.242507	111298042
chr11_111247019_C_A_b38	ENSG00000150750	5.28301	2.18968e-07	9.37692e-05	0.426682	chr11:111247019	rs11213799	C	A	11:111247019_C/A	11	734	170	0.231608	111247019
chr11_111247113_C_T_b38	ENSG00000150750	5.28301	2.18968e-07	9.37692e-05	0.426682	chr11:111247113	rs35759288	C	T	11:111247113_C/T	11	734	170	0.231608	111247113
chr11_111313450_TA_T_b38	ENSG00000150750	-5.20267	3.28313e-07	0.000130133	-0.380222	chr11:111313450	chr11:111313450	TA	T	11:111313450_TA/T	11	734	276	0.376022	111313450
chr11_111314663_G_A_b38	ENSG00000150750	-5.20267	3.28313e-07	0.000130133	-0.380222	chr11:111314663	rs7938881	G	A	11:111314663_G/A	11	734	276	0.376022	111314663
chr11_111311727_G_T_b38	ENSG00000150750	-5.19993	3.32848e-07	0.00013034	-0.381927	chr11:111311727	rs10891248	G	T	11:111311727_G/T	11	734	267	0.36376	111311727
chr11_111311905_T_C_b38	ENSG00000150750	-5.19993	3.32848e-07	0.00013034	-0.381927	chr11:111311905	rs10891249	T	C	11:111311905_T/C	11	734	267	0.36376	111311905
chr11_111312967_C_T_b38	ENSG00000150750	-5.19993	3.32848e-07	0.00013034	-0.381927	chr11:111312967	rs10891250	C	T	11:111312967_C/T	11	734	267	0.36376	111312967
chr11_111313669_A_G_b38	ENSG00000150750	-5.19993	3.32848e-07	0.00013034	-0.381927	chr11:111313669	rs11213828	A	G	11:111313669_A/G	11	734	267	0.36376	111313669
chr11_111313948_T_C_b38	ENSG00000150750	-5.19993	3.32848e-07	0.00013034	-0.381927	chr11:111313948	rs11213829	T	C	11:111313948_T/C	11	734	267	0.36376	111313948
chr11_111314726_A_G_b38	ENSG00000150750	-5.19993	3.32848e-07	0.00013034	-0.381927	chr11:111314726	rs7938622	A	G	11:111314726_A/G	11	734	267	0.36376	111314726
chr11_111316185_G_A_b38	ENSG00000150750	-5.19993	3.32848e-07	0.00013034	-0.381927	chr11:111316185	rs10891253	G	A	11:111316185_G/A	11	734	267	0.36376	111316185
chr11_111245754_G_A_b38	ENSG00000150750	5.18994	3.49912e-07	0.000136152	0.413589	chr11:111245754	rs1568202	G	A	11:111245754_G/A	11	734	172	0.234332	111245754
chr11_111250082_C_G_b38	ENSG00000150750	5.18331	3.61687e-07	0.000139847	0.402542	chr11:111250082	rs7939167	C	G	11:111250082_C/G	11	734	200	0.27248	111250082
chr11_111316873_A_G_b38	ENSG00000150750	-5.1798	3.68094e-07	0.000141966	-0.382307	chr11:111316873	rs12807413	A	G	11:111316873_A/G	11	734	266	0.362398	111316873
chr11_111386477_C_T_b38	ENSG00000150750	-5.13578	4.58229e-07	0.000172816	-0.373995	chr11:111386477	rs12800302	C	T	11:111386477_C/T	11	734	324	0.441417	111386477
chr11_111317996_T_C_b38	ENSG00000150750	-5.03012	7.70446e-07	0.000270595	-0.369781	chr11:111317996	rs10891255	T	C	11:111317996_T/C	11	734	266	0.362398	111317996
chr11_111318433_A_G_b38	ENSG00000150750	-5.03012	7.70446e-07	0.000270595	-0.369781	chr11:111318433	rs10749971	A	G	11:111318433_A/G	11	734	266	0.362398	111318433
chr11_111318709_A_T_b38	ENSG00000150750	-5.03012	7.70446e-07	0.000270595	-0.369781	chr11:111318709	rs10749972	A	T	11:111318709_A/T	11	734	266	0.362398	111318709
chr11_111318718_A_G_b38	ENSG00000150750	-5.03012	7.70446e-07	0.000270595	-0.369781	chr11:111318718	rs10749973	A	G	11:111318718_A/G	11	734	266	0.362398	111318718
chr11_111320365_A_C_b38	ENSG00000150750	-5.03012	7.70446e-07	0.000270595	-0.369781	chr11:111320365	rs2002180	A	C	11:111320365_A/C	11	734	266	0.362398	111320365
chr11_111385943_C_T_b38	ENSG00000150750	-4.848	1.8485e-06	0.000597865	-0.351726	chr11:111385943	rs7127806	C	T	11:111385943_C/T	11	734	263	0.358311	111385943
chr11_111310924_A_C_b38	ENSG00000150750	-4.73618	3.12298e-06	0.000974108	-0.34964	chr11:111310924	rs7130102	A	C	11:111310924_A/C	11	734	257	0.350136	111310924
chr11_111389477_C_T_b38	ENSG00000150750	-4.52621	8.13804e-06	0.00216789	-0.325012	chr11:111389477	rs883326	C	T	11:111389477_C/T	11	734	344	0.468665	111389477
chr11_111411904_A_G_b38	ENSG00000150750	-4.42285	1.28715e-05	0.00326974	-0.373346	chr11:111411904	rs11213878	A	G	11:111411904_A/G	11	734	207	0.282016	111411904
chr11_111304778_G_GA_b38	ENSG00000150750	4.32003	2.01357e-05	0.0048575	0.437917	chr11:111304778	chr11:111304778	G	GA	11:111304778_G/GA	11	734	104	0.141689	111304778
chr11_111344222_G_A_b38	ENSG00000150750	4.31269	2.0783e-05	0.0049901	0.336526	chr11:111344222	rs4938488	G	A	11:111344222_G/A	11	734	234	0.318801	111344222
chr11_111330344_G_C_b38	ENSG00000150750	-4.24815	2.73914e-05	0.00629106	-0.308764	chr11:111330344	rs7929076	G	C	11:111330344_G/C	11	734	280	0.381471	111330344
chr11_111328474_C_T_b38	ENSG00000150750	4.24412	2.78647e-05	0.00638067	0.390439	chr11:111328474	rs34664097	C	T	11:111328474_C/T	11	734	124	0.168937	111328474
chr11_111344789_C_T_b38	ENSG00000150750	-4.23411	2.90729e-05	0.00662763	-0.313697	chr11:111344789	rs7116894	C	T	11:111344789_C/T	11	734	346	0.47139	111344789
chr11_111303892_T_TA_b38	ENSG00000150750	4.20221	3.32697e-05	0.00746215	0.367053	chr11:111303892	chr11:111303892	T	TA	11:111303892_T/TA	11	734	160	0.217984	111303892
chr11_111419757_G_T_b38	ENSG00000150750	4.19029	3.49828e-05	0.00777827	0.351354	chr11:111419757	rs57797362	G	T	11:111419757_G/T	11	734	217	0.29564	111419757
chr11_111333946_A_G_b38	ENSG00000150750	-4.15484	4.0584e-05	0.00880652	-0.30421	chr11:111333946	rs2003311	A	G	11:111333946_A/G	11	734	341	0.464578	111333946
chr11_111341014_T_C_b38	ENSG00000150750	4.15281	4.09287e-05	0.00886877	0.323776	chr11:111341014	rs7116100	T	C	11:111341014_T/C	11	734	231	0.314714	111341014
chr11_111343907_A_G_b38	ENSG00000150750	-4.13027	4.49556e-05	0.00960559	-0.298457	chr11:111343907	rs11213841	A	G	11:111343907_A/G	11	734	279	0.380109	111343907
chr11_111327051_C_T_b38	ENSG00000150750	4.12199	4.65281e-05	0.00983874	0.324975	chr11:111327051	rs7944798	C	T	11:111327051_C/T	11	734	219	0.298365	111327051
chr11_111333872_C_G_b38	ENSG00000150750	-4.10682	4.95455e-05	0.0103624	-0.301223	chr11:111333872	rs2003312	C	G	11:111333872_C/G	11	734	357	0.486376	111333872
chr11_111530884_G_A_b38	ENSG00000150750	-4.08859	5.34176e-05	0.0109629	-0.432946	chr11:111530884	rs11602450	G	A	11:111530884_G/A	11	734	106	0.144414	111530884
chr11_111343219_G_A_b38	ENSG00000150750	-4.08335	5.45827e-05	0.0111128	-0.296533	chr11:111343219	rs12365324	G	A	11:111343219_G/A	11	734	282	0.384196	111343219
chr11_111350238_C_A_b38	ENSG00000150750	-4.07062	5.75164e-05	0.0116022	-0.294766	chr11:111350238	rs4641517	C	A	11:111350238_C/A	11	734	280	0.381471	111350238
chr11_111351988_G_A_b38	ENSG00000150750	-4.07062	5.75164e-05	0.0116022	-0.294766	chr11:111351988	rs10502143	G	A	11:111351988_G/A	11	734	280	0.381471	111351988
chr11_111332334_T_G_b38	ENSG00000150750	-4.06859	5.7998e-05	0.011684	-0.299454	chr11:111332334	rs7951890	T	G	11:111332334_T/G	11	734	356	0.485014	111332334
chr11_111340067_A_T_b38	ENSG00000150750	4.05546	6.12036e-05	0.0121936	0.316253	chr11:111340067	rs7126039	A	T	11:111340067_A/T	11	734	230	0.313351	111340067
chr11_111341072_C_T_b38	ENSG00000150750	4.05546	6.12036e-05	0.0121936	0.316253	chr11:111341072	rs7130334	C	T	11:111341072_C/T	11	734	230	0.313351	111341072
chr11_111348925_T_G_b38	ENSG00000150750	-4.02616	6.8978e-05	0.0134028	-0.291258	chr11:111348925	rs11213845	T	G	11:111348925_T/G	11	734	279	0.380109	111348925
chr11_111342457_C_T_b38	ENSG00000150750	4.02116	7.03938e-05	0.0136519	0.313438	chr11:111342457	rs7104680	C	T	11:111342457_C/T	11	734	229	0.311989	111342457
chr11_111344939_G_A_b38	ENSG00000150750	-3.99349	7.87481e-05	0.015072	-0.292184	chr11:111344939	rs7117229	G	A	11:111344939_G/A	11	734	340	0.463215	111344939
chr11_111345616_C_A_b38	ENSG00000150750	3.98981	7.99274e-05	0.0152691	0.311714	chr11:111345616	rs59514954	C	A	11:111345616_C/A	11	734	223	0.303815	111345616
chr11_112210756_GCACACA_G_b38	ENSG00000150750	3.98086	8.28682e-05	0.0157817	0.564328	chr11:112210756	chr11:112210756	GCACACA	G	11:112210756_GCACACA/G	11	734	52	0.0708447	112210756
chr11_111329456_G_A_b38	ENSG00000150750	-3.94076	9.73442e-05	0.0181441	-0.287359	chr11:111329456	rs7102180	G	A	11:111329456_G/A	11	734	352	0.479564	111329456
chr11_111326673_A_G_b38	ENSG00000150750	-3.92889	0.000102069	0.0189134	-0.288167	chr11:111326673	rs7122754	A	G	11:111326673_A/G	11	734	352	0.479564	111326673
chr11_111327185_A_G_b38	ENSG00000150750	-3.92889	0.000102069	0.0189134	-0.288167	chr11:111327185	rs7944897	A	G	11:111327185_A/G	11	734	352	0.479564	111327185
chr11_111311177_C_CGT_b38	ENSG00000150750	-3.92884	0.000102088	0.0189134	-0.306688	chr11:111311177	rs145073421,rs199493648	C	CGT	11:111311177_C/CGT	11	734	363	0.49455	111311177
chr11_111344526_A_G_b38	ENSG00000150750	-3.91602	0.000107436	0.0198085	-0.28745	chr11:111344526	rs7113329	A	G	11:111344526_A/G	11	734	341	0.464578	111344526
chr11_111333268_A_T_b38	ENSG00000150750	-3.91406	0.000108278	0.0199517	-0.286372	chr11:111333268	rs2003313	A	T	11:111333268_A/T	11	734	351	0.478202	111333268
chr11_111420812_C_A_b38	ENSG00000150750	3.90967	0.000110182	0.020266	0.362423	chr11:111420812	rs61896853	C	A	11:111420812_C/A	11	734	153	0.208447	111420812
chr11_111303073_T_C_b38	ENSG00000150750	3.90206	0.000113562	0.0208501	0.402067	chr11:111303073	rs17470275	T	C	11:111303073_T/C	11	734	95	0.129428	111303073
chr11_111411694_G_C_b38	ENSG00000150750	3.89781	0.000115489	0.0211532	0.367612	chr11:111411694	rs4938546	G	C	11:111411694_G/C	11	734	155	0.211172	111411694
chr11_111300418_G_A_b38	ENSG00000150750	3.89652	0.000116083	0.021224	0.400434	chr11:111300418	rs45531632	G	A	11:111300418_G/A	11	734	96	0.13079	111300418
chr11_111330777_G_A_b38	ENSG00000150750	-3.87596	0.000125908	0.0227625	-0.284582	chr11:111330777	rs7932421	G	A	11:111330777_G/A	11	734	350	0.476839	111330777
chr11_111331707_G_A_b38	ENSG00000150750	-3.87596	0.000125908	0.0227625	-0.284582	chr11:111331707	rs4512889	G	A	11:111331707_G/A	11	734	350	0.476839	111331707
chr11_111331761_C_T_b38	ENSG00000150750	-3.87596	0.000125908	0.0227625	-0.284582	chr11:111331761	rs1893990	C	T	11:111331761_C/T	11	734	350	0.476839	111331761
chr11_111336173_T_A_b38	ENSG00000150750	-3.87596	0.000125908	0.0227625	-0.284582	chr11:111336173	rs7946549	T	A	11:111336173_T/A	11	734	350	0.476839	111336173
chr11_111336380_G_A_b38	ENSG00000150750	-3.87596	0.000125908	0.0227625	-0.284582	chr11:111336380	rs7931938	G	A	11:111336380_G/A	11	734	350	0.476839	111336380
chr11_111337593_A_T_b38	ENSG00000150750	-3.87596	0.000125908	0.0227625	-0.284582	chr11:111337593	rs7116848	A	T	11:111337593_A/T	11	734	350	0.476839	111337593
chr11_111337793_T_C_b38	ENSG00000150750	-3.87596	0.000125908	0.0227625	-0.284582	chr11:111337793	rs1893993	T	C	11:111337793_T/C	11	734	350	0.476839	111337793
chr11_111338110_C_T_b38	ENSG00000150750	-3.87596	0.000125908	0.0227625	-0.284582	chr11:111338110	rs7117592	C	T	11:111338110_C/T	11	734	350	0.476839	111338110
chr11_111268402_G_A_b38	ENSG00000150750	3.85698	0.000135676	0.0242001	0.395478	chr11:111268402	rs7941171	G	A	11:111268402_G/A	11	734	97	0.132153	111268402
chr11_111271100_A_T_b38	ENSG00000150750	3.85698	0.000135676	0.0242001	0.395478	chr11:111271100	rs138546385	A	T	11:111271100_A/T	11	734	97	0.132153	111271100
chr11_111274988_A_C_b38	ENSG00000150750	3.85698	0.000135676	0.0242001	0.395478	chr11:111274988	rs76561294	A	C	11:111274988_A/C	11	734	97	0.132153	111274988
chr11_111283425_A_C_b38	ENSG00000150750	3.85698	0.000135676	0.0242001	0.395478	chr11:111283425	rs80224103	A	C	11:111283425_A/C	11	734	97	0.132153	111283425
chr11_111283999_C_A_b38	ENSG00000150750	3.85698	0.000135676	0.0242001	0.395478	chr11:111283999	rs7926730	C	A	11:111283999_C/A	11	734	97	0.132153	111283999
chr11_111276927_G_A_b38	ENSG00000150750	3.85577	0.000136324	0.0242876	0.394325	chr11:111276927	rs74383152	G	A	11:111276927_G/A	11	734	98	0.133515	111276927
chr11_111259040_G_C_b38	ENSG00000150750	3.85053	0.000139154	0.0247199	0.427505	chr11:111259040	rs79759047	G	C	11:111259040_G/C	11	734	83	0.113079	111259040
chr11_111330441_C_A_b38	ENSG00000150750	-3.83431	0.000148285	0.02613	-0.277326	chr11:111330441	rs7929013	C	A	11:111330441_C/A	11	734	285	0.388283	111330441
chr11_111331839_G_T_b38	ENSG00000150750	-3.83431	0.000148285	0.02613	-0.277326	chr11:111331839	rs1893991	G	T	11:111331839_G/T	11	734	285	0.388283	111331839
chr11_111336956_G_C_b38	ENSG00000150750	-3.83431	0.000148285	0.02613	-0.277326	chr11:111336956	rs4296070	G	C	11:111336956_G/C	11	734	285	0.388283	111336956
chr11_111338198_T_C_b38	ENSG00000150750	-3.83431	0.000148285	0.02613	-0.277326	chr11:111338198	rs35349974	T	C	11:111338198_T/C	11	734	285	0.388283	111338198
chr11_111340909_C_A_b38	ENSG00000150750	-3.83431	0.000148285	0.02613	-0.277326	chr11:111340909	rs12364442	C	A	11:111340909_C/A	11	734	285	0.388283	111340909
chr11_111333424_A_G_b38	ENSG00000150750	-3.8213	0.000156011	0.0273343	-0.274747	chr11:111333424	rs2003314	A	G	11:111333424_A/G	11	734	295	0.401907	111333424
chr11_111287152_C_T_b38	ENSG00000150750	3.8204	0.000156557	0.0273363	0.393979	chr11:111287152	rs78750576	C	T	11:111287152_C/T	11	734	95	0.129428	111287152
chr11_111287383_A_T_b38	ENSG00000150750	3.8204	0.000156557	0.0273363	0.393979	chr11:111287383	rs77899623	A	T	11:111287383_A/T	11	734	95	0.129428	111287383
chr11_111287464_C_T_b38	ENSG00000150750	3.8204	0.000156557	0.0273363	0.393979	chr11:111287464	rs11213819	C	T	11:111287464_C/T	11	734	95	0.129428	111287464
chr11_111287798_A_T_b38	ENSG00000150750	3.8204	0.000156557	0.0273363	0.393979	chr11:111287798	rs7929722	A	T	11:111287798_A/T	11	734	95	0.129428	111287798
chr11_111287799_T_A_b38	ENSG00000150750	3.8204	0.000156557	0.0273363	0.393979	chr11:111287799	rs7944817	T	A	11:111287799_T/A	11	734	95	0.129428	111287799
chr11_111293999_G_T_b38	ENSG00000150750	3.8204	0.000156557	0.0273363	0.393979	chr11:111293999	rs45615536,rs535993089	G	T	11:111293999_G/T	11	734	95	0.129428	111293999
chr11_111298385_A_T_b38	ENSG00000150750	3.81898	0.000157428	0.0274451	0.392774	chr11:111298385	rs10244	A	T	11:111298385_A/T	11	734	96	0.13079	111298385
chr11_111336155_T_C_b38	ENSG00000150750	3.81702	0.000158632	0.027573	0.326746	chr11:111336155	rs17471196	T	C	11:111336155_T/C	11	734	148	0.201635	111336155
chr11_111338199_G_A_b38	ENSG00000150750	3.81702	0.000158632	0.027573	0.326746	chr11:111338199	rs4938475	G	A	11:111338199_G/A	11	734	148	0.201635	111338199
chr11_111349280_G_T_b38	ENSG00000150750	-3.80824	0.000164143	0.0279695	-0.279161	chr11:111349280	rs11213846	G	T	11:111349280_G/T	11	734	340	0.463215	111349280
chr11_111349569_C_T_b38	ENSG00000150750	-3.80824	0.000164143	0.0279695	-0.279161	chr11:111349569	rs12803281	C	T	11:111349569_C/T	11	734	340	0.463215	111349569
chr11_111349585_C_T_b38	ENSG00000150750	-3.80824	0.000164143	0.0279695	-0.279161	chr11:111349585	rs12803295	C	T	11:111349585_C/T	11	734	340	0.463215	111349585
chr11_111349736_G_A_b38	ENSG00000150750	-3.80824	0.000164143	0.0279695	-0.279161	chr11:111349736	rs7481296	G	A	11:111349736_G/A	11	734	340	0.463215	111349736
chr11_111352386_A_G_b38	ENSG00000150750	-3.80824	0.000164143	0.0279695	-0.279161	chr11:111352386	rs1042752	A	G	11:111352386_A/G	11	734	340	0.463215	111352386
chr11_111352720_G_A_b38	ENSG00000150750	-3.80824	0.000164143	0.0279695	-0.279161	chr11:111352720	rs12417556	G	A	11:111352720_G/A	11	734	340	0.463215	111352720
chr11_111278907_G_C_b38	ENSG00000150750	3.79824	0.000170645	0.0287959	0.268646	chr11:111278907	rs7934982	G	C	11:111278907_G/C	11	734	298	0.405995	111278907
chr11_111347175_T_G_b38	ENSG00000150750	3.79435	0.000173236	0.0291849	0.323346	chr11:111347175	rs35106034	T	G	11:111347175_T/G	11	734	155	0.211172	111347175
chr11_111347639_C_A_b38	ENSG00000150750	3.79435	0.000173236	0.0291849	0.323346	chr11:111347639	rs34999255	C	A	11:111347639_C/A	11	734	155	0.211172	111347639
chr11_111334213_A_G_b38	ENSG00000150750	3.7795	0.000183487	0.0301499	0.32158	chr11:111334213	rs12574149	A	G	11:111334213_A/G	11	734	158	0.215259	111334213
chr11_111341644_G_A_b38	ENSG00000150750	3.7795	0.000183487	0.0301499	0.32158	chr11:111341644	rs12785346	G	A	11:111341644_G/A	11	734	158	0.215259	111341644
chr11_111341841_C_A_b38	ENSG00000150750	3.7795	0.000183487	0.0301499	0.32158	chr11:111341841	rs56115808	C	A	11:111341841_C/A	11	734	158	0.215259	111341841
chr11_111342034_G_A_b38	ENSG00000150750	3.7795	0.000183487	0.0301499	0.32158	chr11:111342034	rs35389890	G	A	11:111342034_G/A	11	734	158	0.215259	111342034
chr11_111339368_CTT_C_b38	ENSG00000150750	3.77211	0.000188793	0.0309058	0.276526	chr11:111339368	chr11:111339368	CTT	C	11:111339368_CTT/C	11	734	286	0.389646	111339368
chr11_111340785_G_A_b38	ENSG00000150750	3.77211	0.000188793	0.0309058	0.276526	chr11:111340785	rs7130155	G	A	11:111340785_G/A	11	734	286	0.389646	111340785
chr11_111361534_C_T_b38	ENSG00000150750	-3.74804	0.000207112	0.0335682	-0.273912	chr11:111361534	rs1815949	C	T	11:111361534_C/T	11	734	268	0.365123	111361534
chr11_111320015_AT_A_b38	ENSG00000150750	-3.74133	0.00021251	0.034276	-0.267194	chr11:111320015	rs200050852	AT	A	11:111320015_AT/A	11	734	315	0.429155	111320015
chr11_111340966_C_A_b38	ENSG00000150750	3.72951	0.000222342	0.0355996	0.273085	chr11:111340966	rs7130200	C	A	11:111340966_C/A	11	734	285	0.388283	111340966
chr11_111346623_G_A_b38	ENSG00000150750	3.6768	0.000271648	0.0424737	0.305468	chr11:111346623	rs4144344	G	A	11:111346623_G/A	11	734	163	0.222071	111346623
chr11_111392423_C_T_b38	ENSG00000150750	3.63568	0.000317079	0.0479393	0.443548	chr11:111392423	rs113205403	C	T	11:111392423_C/T	11	734	68	0.0926431	111392423
chr11_111364595_G_T_b38	ENSG00000150750	3.6114	0.000347161	0.0517725	0.306524	chr11:111364595	rs45486198	G	T	11:111364595_G/T	11	734	152	0.207084	111364595
chr11_111262363_C_G_b38	ENSG00000150750	3.59856	0.000364122	0.0535981	0.403459	chr11:111262363	rs17112524	C	G	11:111262363_C/G	11	734	81	0.110354	111262363
chr11_111408402_G_A_b38	ENSG00000150750	3.58416	0.000384078	0.056078	0.328982	chr11:111408402	rs56180416	G	A	11:111408402_G/A	11	734	159	0.216621	111408402
chr11_111427974_C_T_b38	ENSG00000150750	3.58366	0.0003848	0.05613	0.345711	chr11:111427974	rs4938597	C	T	11:111427974_C/T	11	734	144	0.196185	111427974
chr11_111426574_C_T_b38	ENSG00000150750	-3.57642	0.000395235	0.0572978	-0.275093	chr11:111426574	rs2068856	C	T	11:111426574_C/T	11	734	292	0.39782	111426574
chr11_110469657_A_AT_b38	ENSG00000150750	3.52022	0.000485752	0.0684459	0.737286	chr11:110469657	rs376730691	A	AT	11:110469657_A/AT	11	734	23	0.0313351	110469657
chr11_111327494_G_T_b38	ENSG00000150750	3.50329	0.000516618	0.0719356	0.294532	chr11:111327494	rs4420303	G	T	11:111327494_G/T	11	734	157	0.213896	111327494
chr11_111350557_C_T_b38	ENSG00000150750	3.4842	0.000553609	0.0763239	0.296991	chr11:111350557	rs10502139	C	T	11:111350557_C/T	11	734	160	0.217984	111350557
chr11_111350665_T_A_b38	ENSG00000150750	3.4842	0.000553609	0.0763239	0.296991	chr11:111350665	rs10502140	T	A	11:111350665_T/A	11	734	160	0.217984	111350665
chr11_111426618_TCA_T_b38	ENSG00000150750	3.46863	0.000585599	0.0801105	0.293172	chr11:111426618	chr11:111426618	TCA	T	11:111426618_TCA/T	11	734	218	0.297003	111426618
chr11_111349443_G_A_b38	ENSG00000150750	3.45016	0.00062579	0.0850137	0.291811	chr11:111349443	rs7112282	G	A	11:111349443_G/A	11	734	161	0.219346	111349443
chr11_111404525_T_C_b38	ENSG00000150750	3.42534	0.000683882	0.090892	0.314685	chr11:111404525	rs4938535	T	C	11:111404525_T/C	11	734	160	0.217984	111404525
chr11_111297819_G_T_b38	ENSG00000150750	3.41356	0.000713177	0.0939305	0.614816	chr11:111297819	rs45583336	G	T	11:111297819_G/T	11	734	32	0.0435967	111297819
chr11_111410197_A_G_b38	ENSG00000150750	3.41258	0.000715658	0.0942167	0.310792	chr11:111410197	rs6589230	A	G	11:111410197_A/G	11	734	160	0.217984	111410197
chr11_111436183_C_T_b38	ENSG00000150750	3.39771	0.00075444	0.0978474	0.332744	chr11:111436183	rs7930326	C	T	11:111436183_C/T	11	734	141	0.192098	111436183
chr11_111348623_G_A_b38	ENSG00000150750	3.37756	0.000810106	0.10282	0.285994	chr11:111348623	rs35971924	G	A	11:111348623_G/A	11	734	160	0.217984	111348623
chr11_111424537_C_T_b38	ENSG00000150750	3.35526	0.00087618	0.108691	0.283683	chr11:111424537	rs4938583	C	T	11:111424537_C/T	11	734	217	0.29564	111424537
chr11_111427997_T_C_b38	ENSG00000150750	3.32412	0.000976855	0.117265	0.26102	chr11:111427997	rs4938599	T	C	11:111427997_T/C	11	734	273	0.371935	111427997
chr11_111265875_TA_T_b38	ENSG00000150750	-3.31954	0.000992516	0.118921	-1.03692	chr11:111265875	rs201448592	TA	T	11:111265875_TA/T	11	734	10	0.013624	111265875
chr11_111405143_T_C_b38	ENSG00000150750	3.30813	0.00103263	0.122768	0.284625	chr11:111405143	rs11213877	T	C	11:111405143_T/C	11	734	207	0.282016	111405143
chr11_111382943_A_AGTGTGTGT_b38	ENSG00000150750	3.30722	0.00103587	0.122915	0.310396	chr11:111382943	chr11:111382943	A	AGTGTGTGT	11:111382943_A/AGTGTGTGT	11	734	123	0.167575	111382943
chr11_111261603_AG_A_b38	ENSG00000150750	3.29952	0.00106388	0.125703	0.372338	chr11:111261603	chr11:111261603	AG	A	11:111261603_AG/A	11	734	80	0.108992	111261603
chr11_111430319_G_A_b38	ENSG00000150750	3.26202	0.00121047	0.13885	0.303592	chr11:111430319	rs10891268	G	A	11:111430319_G/A	11	734	156	0.212534	111430319
chr11_110465687_AT_A_b38	ENSG00000150750	3.25585	0.00123629	0.141495	0.399468	chr11:110465687	chr11:110465687	AT	A	11:110465687_AT/A	11	734	81	0.110354	110465687
chr11_111427573_A_G_b38	ENSG00000150750	3.18999	0.00154594	0.165797	0.251587	chr11:111427573	rs4938594	A	G	11:111427573_A/G	11	734	275	0.374659	111427573
chr11_111311477_C_G_b38	ENSG00000150750	3.14304	0.00180885	0.18377	0.264223	chr11:111311477	rs7130969	C	G	11:111311477_C/G	11	734	164	0.223433	111311477
chr11_111315928_C_T_b38	ENSG00000150750	3.14304	0.00180885	0.18377	0.264223	chr11:111315928	rs12801181	C	T	11:111315928_C/T	11	734	164	0.223433	111315928
chr11_111319979_C_A_b38	ENSG00000150750	3.14304	0.00180885	0.18377	0.264223	chr11:111319979	rs11213832	C	A	11:111319979_C/A	11	734	164	0.223433	111319979
chr11_111326212_C_T_b38	ENSG00000150750	-3.13413	0.00186319	0.187921	-0.218439	chr11:111326212	rs10891256	C	T	11:111326212_C/T	11	734	348	0.474114	111326212
chr11_111426193_G_A_b38	ENSG00000150750	3.12057	0.00194876	0.194885	0.261218	chr11:111426193	rs4938590	G	A	11:111426193_G/A	11	734	221	0.30109	111426193
chr11_111955102_C_T_b38	ENSG00000150750	-3.1188	0.00196019	0.195754	-0.630598	chr11:111955102	rs73560079	C	T	11:111955102_C/T	11	734	25	0.0340599	111955102
chr11_111348310_G_A_b38	ENSG00000150750	3.11593	0.00197885	0.197102	0.23962	chr11:111348310	rs12577316	G	A	11:111348310_G/A	11	734	225	0.30654	111348310
chr11_111325955_T_C_b38	ENSG00000150750	-3.08905	0.00216184	0.211436	-0.210267	chr11:111325955	rs7104509	T	C	11:111325955_T/C	11	734	332	0.452316	111325955
chr11_111277499_G_A_b38	ENSG00000150750	3.0858	0.00218503	0.212889	0.355814	chr11:111277499	rs78504328	G	A	11:111277499_G/A	11	734	75	0.10218	111277499
chr11_111316987_T_G_b38	ENSG00000150750	-3.08225	0.00221056	0.214626	-0.214463	chr11:111316987	rs4264183	T	G	11:111316987_T/G	11	734	290	0.395095	111316987
chr11_111953482_T_C_b38	ENSG00000150750	-3.06981	0.00230227	0.220665	-0.632824	chr11:111953482	rs60483200	T	C	11:111953482_T/C	11	734	24	0.0326975	111953482
chr11_111290766_A_C_b38	ENSG00000150750	3.0487	0.00246595	0.231596	0.354609	chr11:111290766	rs75715579	A	C	11:111290766_A/C	11	734	73	0.099455	111290766
chr11_111300088_C_T_b38	ENSG00000150750	3.0487	0.00246595	0.231596	0.354609	chr11:111300088	rs7105956	C	T	11:111300088_C/T	11	734	73	0.099455	111300088
chr11_111421921_A_T_b38	ENSG00000150750	-3.04457	0.00249921	0.233974	-0.420228	chr11:111421921	rs112891122	A	T	11:111421921_A/T	11	734	54	0.0735695	111421921
chr11_111401675_C_T_b38	ENSG00000150750	3.03961	0.00253967	0.236113	0.264706	chr11:111401675	rs17577003	C	T	11:111401675_C/T	11	734	183	0.249319	111401675
chr11_110347815_C_G_b38	ENSG00000150750	3.02174	0.0026906	0.244004	0.608055	chr11:110347815	rs55770928	C	G	11:110347815_C/G	11	734	23	0.0313351	110347815
chr11_111325894_G_A_b38	ENSG00000150750	3.02078	0.00269892	0.2445	0.24126	chr11:111325894	rs4938459	G	A	11:111325894_G/A	11	734	192	0.26158	111325894
chr11_111401355_G_A_b38	ENSG00000150750	3.01935	0.00271135	0.244799	0.263041	chr11:111401355	rs61896843	G	A	11:111401355_G/A	11	734	179	0.243869	111401355
chr11_111312526_C_T_b38	ENSG00000150750	-3.01663	0.00273519	0.246443	-0.644352	chr11:111312526	rs61896808	C	T	11:111312526_C/T	11	734	20	0.027248	111312526
chr11_111401376_G_A_b38	ENSG00000150750	3.01143	0.00278136	0.249066	0.262345	chr11:111401376	rs4938532	G	A	11:111401376_G/A	11	734	180	0.245232	111401376
chr11_111331728_C_G_b38	ENSG00000150750	-2.99028	0.00297627	0.25881	-0.213253	chr11:111331728	rs1893988	C	G	11:111331728_C/G	11	734	332	0.452316	111331728
chr11_111331753_A_G_b38	ENSG00000150750	-2.99028	0.00297627	0.25881	-0.213253	chr11:111331753	rs1893989	A	G	11:111331753_A/G	11	734	332	0.452316	111331753
chr11_111336349_A_G_b38	ENSG00000150750	-2.99028	0.00297627	0.25881	-0.213253	chr11:111336349	rs7931570	A	G	11:111336349_A/G	11	734	332	0.452316	111336349
chr11_111312432_A_G_b38	ENSG00000150750	-2.98718	0.00300592	0.260705	-0.212408	chr11:111312432	rs4617622	A	G	11:111312432_A/G	11	734	283	0.385559	111312432
chr11_111257361_CT_C_b38	ENSG00000150750	2.97735	0.00310157	0.265713	0.33012	chr11:111257361	chr11:111257361	CT	C	11:111257361_CT/C	11	734	102	0.138965	111257361
chr11_111401839_G_A_b38	ENSG00000150750	2.96717	0.00320359	0.270671	0.256521	chr11:111401839	rs12362765	G	A	11:111401839_G/A	11	734	182	0.247956	111401839
chr11_111148076_G_A_b38	ENSG00000150750	-2.93433	0.00355409	0.288689	-0.733147	chr11:111148076	rs73021558	G	A	11:111148076_G/A	11	734	16	0.0217984	111148076
chr11_111351502_G_A_b38	ENSG00000150750	2.91824	0.00373818	0.299197	0.234685	chr11:111351502	rs45611937	G	A	11:111351502_G/A	11	734	182	0.247956	111351502
chr11_111352680_G_A_b38	ENSG00000150750	2.91824	0.00373818	0.299197	0.234685	chr11:111352680	rs11213847	G	A	11:111352680_G/A	11	734	182	0.247956	111352680
chr11_111352791_A_G_b38	ENSG00000150750	2.91824	0.00373818	0.299197	0.234685	chr11:111352791	rs11825875	A	G	11:111352791_A/G	11	734	182	0.247956	111352791
chr11_111401725_G_A_b38	ENSG00000150750	2.89388	0.00403363	0.314728	0.450277	chr11:111401725	rs80221863	G	A	11:111401725_G/A	11	734	45	0.0613079	111401725
chr11_112245561_G_A_b38	ENSG00000150750	-2.88399	0.00415962	0.321745	-0.827666	chr11:112245561	chr11:112245561	G	A	11:112245561_G/A	11	734	12	0.0163488	112245561
chr11_111312087_G_C_b38	ENSG00000150750	-2.87795	0.00423824	0.326017	-0.214074	chr11:111312087	rs5020096	G	C	11:111312087_G/C	11	734	234	0.318801	111312087
chr11_110353489_C_T_b38	ENSG00000150750	2.87161	0.00432219	0.329089	0.209187	chr11:110353489	rs1784632	C	T	11:110353489_C/T	11	734	307	0.418256	110353489
chr11_110883140_T_TAC_b38	ENSG00000150750	-2.86704	0.00438369	0.331795	-0.417074	chr11:110883140	rs371354099	T	TAC	11:110883140_T/TAC	11	734	50	0.0681199	110883140
chr11_111410341_G_A_b38	ENSG00000150750	-2.86371	0.00442906	0.334311	-0.378092	chr11:111410341	rs2213027	G	A	11:111410341_G/A	11	734	61	0.0831063	111410341
chr11_111962482_C_CA_b38	ENSG00000150750	-2.86073	0.00446995	0.336083	-0.737571	chr11:111962482	chr11:111962482	C	CA	11:111962482_C/CA	11	734	15	0.020436	111962482
chr11_111358352_T_TCTCA_b38	ENSG00000150750	2.85646	0.00452917	0.338957	0.546199	chr11:111358352	chr11:111358352	T	TCTCA	11:111358352_T/TCTCA	11	734	26	0.0354223	111358352
chr11_111305833_T_C_b38	ENSG00000150750	-2.85553	0.00454205	0.339507	-0.195305	chr11:111305833	rs11213824	T	C	11:111305833_T/C	11	734	318	0.433243	111305833
chr11_111425054_T_C_b38	ENSG00000150750	2.84543	0.00468542	0.346423	0.237716	chr11:111425054	rs4938586	T	C	11:111425054_T/C	11	734	225	0.30654	111425054
chr11_110436661_G_A_b38	ENSG00000150750	-2.8437	0.00471036	0.347178	-0.938689	chr11:110436661	rs188463932	G	A	11:110436661_G/A	11	734	9	0.0122616	110436661
chr11_110806102_C_T_b38	ENSG00000150750	-2.83128	0.0048931	0.355015	-0.754697	chr11:110806102	rs117414310	C	T	11:110806102_C/T	11	734	14	0.0190736	110806102
chr11_112227060_G_GA_b38	ENSG00000150750	2.82319	0.00501549	0.357549	0.478796	chr11:112227060	rs111991945	G	GA	11:112227060_G/GA	11	734	37	0.0504087	112227060
chr11_111299719_G_A_b38	ENSG00000150750	2.81376	0.00516162	0.362572	0.550384	chr11:111299719	rs117460636	G	A	11:111299719_G/A	11	734	27	0.0367847	111299719
chr11_110365229_T_G_b38	ENSG00000150750	-2.8107	0.00521003	0.363935	-0.212195	chr11:110365229	rs2852993	T	G	11:110365229_T/G	11	734	273	0.371935	110365229
chr11_110365232_T_C_b38	ENSG00000150750	-2.8107	0.00521003	0.363935	-0.212195	chr11:110365232	rs2585802	T	C	11:110365232_T/C	11	734	273	0.371935	110365232
chr11_110663795_C_A_b38	ENSG00000150750	-2.81031	0.00521616	0.363985	-0.702832	chr11:110663795	rs10891159	C	A	11:110663795_C/A	11	734	16	0.0217984	110663795
chr11_110366813_G_T_b38	ENSG00000150750	-2.80207	0.00534826	0.369907	-0.367942	chr11:110366813	rs75112503	G	T	11:110366813_G/T	11	734	59	0.0803815	110366813
chr11_110471822_C_G_b38	ENSG00000150750	-2.79791	0.00541626	0.371024	-0.225211	chr11:110471822	rs2298511	C	G	11:110471822_C/G	11	734	183	0.249319	110471822
chr11_110472069_A_G_b38	ENSG00000150750	-2.79791	0.00541626	0.371024	-0.225211	chr11:110472069	rs10789770	A	G	11:110472069_A/G	11	734	183	0.249319	110472069
chr11_111760199_C_T_b38	ENSG00000150750	2.79101	0.00553046	0.375408	0.549692	chr11:111760199	rs77277356	C	T	11:111760199_C/T	11	734	22	0.0299728	111760199
chr11_111767344_A_T_b38	ENSG00000150750	2.79101	0.00553046	0.375408	0.549692	chr11:111767344	rs77827985	A	T	11:111767344_A/T	11	734	22	0.0299728	111767344
chr11_111784549_C_T_b38	ENSG00000150750	2.79101	0.00553046	0.375408	0.549692	chr11:111784549	rs45620134	C	T	11:111784549_C/T	11	734	22	0.0299728	111784549
chr11_111448885_AC_A_b38	ENSG00000150750	-2.78063	0.00570664	0.382372	-0.20661	chr11:111448885	chr11:111448885	AC	A	11:111448885_AC/A	11	734	274	0.373297	111448885
chr11_111427528_G_A_b38	ENSG00000150750	2.77917	0.00573184	0.383057	0.232491	chr11:111427528	rs4938593	G	A	11:111427528_G/A	11	734	226	0.307902	111427528
chr11_111312761_A_G_b38	ENSG00000150750	-2.75903	0.00608935	0.396014	-0.415497	chr11:111312761	rs74688869	A	G	11:111312761_A/G	11	734	46	0.0626703	111312761
chr11_111261487_C_T_b38	ENSG00000150750	2.75796	0.00610898	0.397011	0.355914	chr11:111261487	rs116923987	C	T	11:111261487_C/T	11	734	59	0.0803815	111261487
chr11_110472262_A_T_b38	ENSG00000150750	-2.75423	0.00617758	0.399287	-0.224874	chr11:110472262	rs7939476	A	T	11:110472262_A/T	11	734	179	0.243869	110472262
chr11_111404257_T_C_b38	ENSG00000150750	-2.74563	0.00633845	0.403997	-0.210991	chr11:111404257	rs11213876	T	C	11:111404257_T/C	11	734	284	0.386921	111404257
chr11_110766588_T_C_b38	ENSG00000150750	-2.74484	0.00635329	0.404445	-0.758694	chr11:110766588	rs118069550	T	C	11:110766588_T/C	11	734	13	0.0177112	110766588
chr11_111507073_TA_T_b38	ENSG00000150750	-2.74427	0.00636414	0.404567	-0.546497	chr11:111507073	rs557250825	TA	T	11:111507073_TA/T	11	734	26	0.0354223	111507073
chr11_111418745_G_C_b38	ENSG00000150750	-2.7401	0.00644379	0.406982	-0.221446	chr11:111418745	rs12795129	G	C	11:111418745_G/C	11	734	217	0.29564	111418745
chr11_111283058_C_CT_b38	ENSG00000150750	-2.73925	0.00646022	0.407223	-0.215453	chr11:111283058	chr11:111283058	C	CT	11:111283058_C/CT	11	734	151	0.205722	111283058
chr11_111430282_G_A_b38	ENSG00000150750	2.73817	0.00648098	0.407965	0.227056	chr11:111430282	rs10891267,rs386757480	G	A	11:111430282_G/A	11	734	232	0.316076	111430282
chr11_111415890_A_G_b38	ENSG00000150750	-2.72316	0.00677671	0.419087	-0.223956	chr11:111415890	rs7127521	A	G	11:111415890_A/G	11	734	211	0.287466	111415890
chr11_110468543_CA_C_b38	ENSG00000150750	-2.71436	0.00695558	0.423335	-0.244266	chr11:110468543	chr11:110468543	CA	C	11:110468543_CA/C	11	734	139	0.189373	110468543
chr11_111311177_CGT_C_b38	ENSG00000150750	2.70745	0.00709904	0.428309	0.234191	chr11:111311177	rs145073421,rs199493648	CGT	C	11:111311177_CGT/C	11	734	159	0.216621	111311177
chr11_111429076_T_G_b38	ENSG00000150750	2.69632	0.00733578	0.435227	0.224853	chr11:111429076	rs2156724	T	G	11:111429076_T/G	11	734	230	0.313351	111429076
chr11_111314720_T_C_b38	ENSG00000150750	2.69382	0.00738996	0.437401	0.232511	chr11:111314720	rs10891252	T	C	11:111314720_T/C	11	734	150	0.20436	111314720
chr11_111692694_T_A_b38	ENSG00000150750	2.69036	0.00746543	0.440447	0.540007	chr11:111692694	rs17474471	T	A	11:111692694_T/A	11	734	21	0.0286104	111692694
chr11_111710419_A_T_b38	ENSG00000150750	2.69036	0.00746543	0.440447	0.540007	chr11:111710419	rs45524342	A	T	11:111710419_A/T	11	734	21	0.0286104	111710419
chr11_111389954_TA_T_b38	ENSG00000150750	2.68891	0.0074973	0.441224	0.411294	chr11:111389954	chr11:111389954	TA	T	11:111389954_TA/T	11	734	47	0.0640327	111389954
chr11_111391888_A_C_b38	ENSG00000150750	2.68891	0.0074973	0.441224	0.411294	chr11:111391888	rs2187472	A	C	11:111391888_A/C	11	734	47	0.0640327	111391888
chr11_111393020_A_T_b38	ENSG00000150750	2.68891	0.0074973	0.441224	0.411294	chr11:111393020	rs17112736	A	T	11:111393020_A/T	11	734	47	0.0640327	111393020
chr11_110678597_T_C_b38	ENSG00000150750	-2.6876	0.00752615	0.441397	-0.843792	chr11:110678597	rs7106092	T	C	11:110678597_T/C	11	734	10	0.013624	110678597
chr11_110685587_AAT_A_b38	ENSG00000150750	-2.6876	0.00752615	0.441397	-0.843792	chr11:110685587	chr11:110685587	AAT	A	11:110685587_AAT/A	11	734	10	0.013624	110685587
chr11_110686652_C_T_b38	ENSG00000150750	-2.6876	0.00752615	0.441397	-0.843792	chr11:110686652	rs75279701	C	T	11:110686652_C/T	11	734	10	0.013624	110686652
chr11_110688895_T_C_b38	ENSG00000150750	-2.6876	0.00752615	0.441397	-0.843792	chr11:110688895	rs76725262	T	C	11:110688895_T/C	11	734	10	0.013624	110688895
chr11_110691189_T_G_b38	ENSG00000150750	-2.6876	0.00752615	0.441397	-0.843792	chr11:110691189	rs76797189	T	G	11:110691189_T/G	11	734	10	0.013624	110691189
chr11_110692715_A_C_b38	ENSG00000150750	-2.6876	0.00752615	0.441397	-0.843792	chr11:110692715	rs59840624	A	C	11:110692715_A/C	11	734	10	0.013624	110692715
chr11_110692880_T_C_b38	ENSG00000150750	-2.6876	0.00752615	0.441397	-0.843792	chr11:110692880	rs77446578	T	C	11:110692880_T/C	11	734	10	0.013624	110692880
chr11_110697159_A_G_b38	ENSG00000150750	-2.6876	0.00752615	0.441397	-0.843792	chr11:110697159	rs7131569	A	G	11:110697159_A/G	11	734	10	0.013624	110697159
chr11_110697531_G_T_b38	ENSG00000150750	-2.6876	0.00752615	0.441397	-0.843792	chr11:110697531	rs139508704	G	T	11:110697531_G/T	11	734	10	0.013624	110697531
chr11_110698242_A_G_b38	ENSG00000150750	-2.6876	0.00752615	0.441397	-0.843792	chr11:110698242	rs79876387	A	G	11:110698242_A/G	11	734	10	0.013624	110698242
chr11_110705009_C_A_b38	ENSG00000150750	-2.6876	0.00752615	0.441397	-0.843792	chr11:110705009	rs76804303	C	A	11:110705009_C/A	11	734	10	0.013624	110705009
chr11_112229950_C_A_b38	ENSG00000150750	-2.67444	0.00782199	0.451729	-0.739614	chr11:112229950	rs76051337	C	A	11:112229950_C/A	11	734	13	0.0177112	112229950
chr11_112245360_A_G_b38	ENSG00000150750	-2.67444	0.00782199	0.451729	-0.739614	chr11:112245360	rs1960532	A	G	11:112245360_A/G	11	734	13	0.0177112	112245360
chr11_112195139_A_AT_b38	ENSG00000150750	2.67188	0.00788086	0.452591	0.438294	chr11:112195139	chr11:112195139	A	AT	11:112195139_A/AT	11	734	40	0.0544959	112195139
chr11_111317572_T_TTG_b38	ENSG00000150750	2.66855	0.00795782	0.45573	0.265915	chr11:111317572	chr11:111317572	T	TTG	11:111317572_T/TTG	11	734	114	0.155313	111317572
chr11_110308833_CTT_C_b38	ENSG00000150750	2.66085	0.00813858	0.459946	0.764896	chr11:110308833	chr11:110308833	CTT	C	11:110308833_CTT/C	11	734	12	0.0163488	110308833
chr11_111430057_T_G_b38	ENSG00000150750	2.65543	0.00826786	0.461769	0.214683	chr11:111430057	rs4936453	T	G	11:111430057_T/G	11	734	247	0.336512	111430057
chr11_111412872_A_G_b38	ENSG00000150750	-2.6576	0.00821594	0.461769	-0.219166	chr11:111412872	rs11213880	A	G	11:111412872_A/G	11	734	215	0.292916	111412872
chr11_111977411_G_A_b38	ENSG00000150750	2.65191	0.00835288	0.463229	0.513774	chr11:111977411	rs75508818	G	A	11:111977411_G/A	11	734	23	0.0313351	111977411
chr11_112018671_C_G_b38	ENSG00000150750	2.65191	0.00835288	0.463229	0.513774	chr11:112018671	rs74373890	C	G	11:112018671_C/G	11	734	23	0.0313351	112018671
chr11_112057329_C_T_b38	ENSG00000150750	2.65191	0.00835288	0.463229	0.513774	chr11:112057329	rs4937001	C	T	11:112057329_C/T	11	734	23	0.0313351	112057329
chr11_112109017_C_G_b38	ENSG00000150750	2.65191	0.00835288	0.463229	0.513774	chr11:112109017	rs76460663	C	G	11:112109017_C/G	11	734	23	0.0313351	112109017
chr11_110440159_CT_C_b38	ENSG00000150750	-2.64761	0.00845789	0.463397	-0.294734	chr11:110440159	chr11:110440159	CT	C	11:110440159_CT/C	11	734	89	0.121253	110440159
chr11_110345251_T_C_b38	ENSG00000150750	-2.64269	0.00857929	0.466241	-0.189721	chr11:110345251	rs12578007	T	C	11:110345251_T/C	11	734	341	0.464578	110345251
chr11_111349931_T_C_b38	ENSG00000150750	2.62373	0.00906217	0.475738	0.511039	chr11:111349931	rs75772250	T	C	11:111349931_T/C	11	734	25	0.0340599	111349931
chr11_111351622_C_G_b38	ENSG00000150750	2.62373	0.00906217	0.475738	0.511039	chr11:111351622	rs45548141	C	G	11:111351622_C/G	11	734	25	0.0340599	111351622
chr11_111973556_T_G_b38	ENSG00000150750	-2.62187	0.0091108	0.476442	-0.468694	chr11:111973556	rs60241330	T	G	11:111973556_T/G	11	734	33	0.0449591	111973556
chr11_111425046_C_G_b38	ENSG00000150750	2.61585	0.00926999	0.480769	0.723712	chr11:111425046	rs117162189	C	G	11:111425046_C/G	11	734	13	0.0177112	111425046
chr11_112118945_G_T_b38	ENSG00000150750	2.61151	0.00938638	0.483778	0.211931	chr11:112118945	rs919478	G	T	11:112118945_G/T	11	734	184	0.250681	112118945
chr11_112104136_C_CT_b38	ENSG00000150750	2.61037	0.00941689	0.48478	0.550811	chr11:112104136	chr11:112104136	C	CT	11:112104136_C/CT	11	734	23	0.0313351	112104136
chr11_111462359_G_A_b38	ENSG00000150750	2.6028	0.00962349	0.487557	0.194205	chr11:111462359	rs12575592	G	A	11:111462359_G/A	11	734	276	0.376022	111462359
chr11_111402858_TTAA_T_b38	ENSG00000150750	-2.59122	0.00994735	0.492969	-0.200826	chr11:111402858	chr11:111402858	TTAA	T	11:111402858_TTAA/T	11	734	281	0.382834	111402858

## Sheet: COLCA1_cis-eQTLs
snps	gene	statistic	pvalue	FDR	beta	marker	rsid	REF	ALT	markerID	chr	nAllele	Count	Frequency	POS
chr11_111302186_G_C_b38	ENSG00000196167	11.0201	1.42377e-24	8.0842e-21	0.729471	chr11:111302186	rs6589219	G	C	11:111302186_G/C	11	734	245	0.333787	111302186
chr11_111302565_C_T_b38	ENSG00000196167	10.9016	3.81251e-24	2.01546e-20	0.724294	chr11:111302565	rs6589220	C	T	11:111302565_C/T	11	734	246	0.33515	111302565
chr11_111286502_T_TAAAAC_b38	ENSG00000196167	10.8814	4.50749e-24	2.34248e-20	0.741953	chr11:111286502	rs71461518,rs76940233	T	TAAAAC	11:111286502_T/TAAAAC	11	734	234	0.318801	111286502
chr11_111283347_A_C_b38	ENSG00000196167	10.7193	1.718e-23	8.3613e-20	0.732318	chr11:111283347	rs7130173	A	C	11:111283347_A/C	11	734	232	0.316076	111283347
chr11_111286111_T_C_b38	ENSG00000196167	10.7005	2.0047e-23	9.60419e-20	0.74306	chr11:111286111	rs3087967	T	C	11:111286111_T/C	11	734	228	0.310627	111286111
chr11_111300346_T_C_b38	ENSG00000196167	10.6802	2.37001e-23	1.00928e-19	0.73152	chr11:111300346	rs7122375	T	C	11:111300346_T/C	11	734	234	0.318801	111300346
chr11_111300921_T_G_b38	ENSG00000196167	10.6802	2.37001e-23	1.00928e-19	0.73152	chr11:111300921	rs3802840	T	G	11:111300921_T/G	11	734	234	0.318801	111300921
chr11_111300947_G_T_b38	ENSG00000196167	10.6802	2.37001e-23	1.00928e-19	0.73152	chr11:111300947	rs3802841	G	T	11:111300947_G/T	11	734	234	0.318801	111300947
chr11_111300984_C_A_b38	ENSG00000196167	10.6802	2.37001e-23	1.00928e-19	0.73152	chr11:111300984	rs3802842	C	A	11:111300984_C/A	11	734	234	0.318801	111300984
chr11_111301454_T_C_b38	ENSG00000196167	10.6802	2.37001e-23	1.00928e-19	0.73152	chr11:111301454	rs4608113	T	C	11:111301454_T/C	11	734	234	0.318801	111301454
chr11_111301485_A_G_b38	ENSG00000196167	10.6802	2.37001e-23	1.00928e-19	0.73152	chr11:111301485	rs4520624	A	G	11:111301485_A/G	11	734	234	0.318801	111301485
chr11_111301511_ATGTGCAATG_A_b38	ENSG00000196167	10.6802	2.37001e-23	1.00928e-19	0.73152	chr11:111301511	chr11:111301511	ATGTGCAATG	A	11:111301511_ATGTGCAATG/A	11	734	234	0.318801	111301511
chr11_111301678_T_C_b38	ENSG00000196167	10.6802	2.37001e-23	1.00928e-19	0.73152	chr11:111301678	rs10789823	T	C	11:111301678_T/C	11	734	234	0.318801	111301678
chr11_111299265_T_C_b38	ENSG00000196167	10.5784	5.45016e-23	2.25824e-19	0.723234	chr11:111299265	rs11213823	T	C	11:111299265_T/C	11	734	243	0.331063	111299265
chr11_111290028_C_T_b38	ENSG00000196167	10.5524	6.74157e-23	2.68449e-19	0.721562	chr11:111290028	rs4477469	C	T	11:111290028_C/T	11	734	236	0.321526	111290028
chr11_111291966_A_G_b38	ENSG00000196167	10.5524	6.74157e-23	2.68449e-19	0.721562	chr11:111291966	rs10789822	A	G	11:111291966_A/G	11	734	236	0.321526	111291966
chr11_111294284_C_T_b38	ENSG00000196167	10.5524	6.74157e-23	2.68449e-19	0.721562	chr11:111294284	rs7103178	C	T	11:111294284_C/T	11	734	236	0.321526	111294284
chr11_111299815_A_G_b38	ENSG00000196167	10.4888	1.13111e-22	4.44632e-19	0.73358	chr11:111299815	rs10891246	A	G	11:111299815_A/G	11	734	231	0.314714	111299815
chr11_111289766_T_C_b38	ENSG00000196167	10.4014	2.29946e-22	8.92463e-19	0.714256	chr11:111289766	rs11213820	T	C	11:111289766_T/C	11	734	237	0.322888	111289766
chr11_111296832_A_C_b38	ENSG00000196167	10.0278	4.59847e-21	1.48416e-17	0.67545	chr11:111296832	rs6589218	A	C	11:111296832_A/C	11	734	252	0.343324	111296832
chr11_111297051_C_G_b38	ENSG00000196167	10.0278	4.59847e-21	1.48416e-17	0.67545	chr11:111297051	rs7944895	C	G	11:111297051_C/G	11	734	252	0.343324	111297051
chr11_111300019_C_T_b38	ENSG00000196167	10.0278	4.59847e-21	1.48416e-17	0.67545	chr11:111300019	rs7105857	C	T	11:111300019_C/T	11	734	252	0.343324	111300019
chr11_111295779_G_A_b38	ENSG00000196167	9.92073	1.07293e-20	3.42682e-17	0.667328	chr11:111295779	rs12296076	G	A	11:111295779_G/A	11	734	254	0.346049	111295779
chr11_111269318_C_G_b38	ENSG00000196167	9.66873	7.72672e-20	2.278e-16	0.652149	chr11:111269318	rs4548657	C	G	11:111269318_C/G	11	734	246	0.33515	111269318
chr11_111269217_C_T_b38	ENSG00000196167	9.59601	1.35864e-19	3.30617e-16	0.648887	chr11:111269217	rs36029541	C	T	11:111269217_C/T	11	734	247	0.336512	111269217
chr11_111281771_C_G_b38	ENSG00000196167	9.52558	2.34135e-19	4.66162e-16	0.645075	chr11:111281771	rs1987128	C	G	11:111281771_C/G	11	734	247	0.336512	111281771
chr11_111269214_A_AC_b38	ENSG00000196167	9.43826	4.58248e-19	8.78158e-16	0.648618	chr11:111269214	rs59942963,rs77037348	A	AC	11:111269214_A/AC	11	734	242	0.3297	111269214
chr11_111272783_A_G_b38	ENSG00000196167	9.01994	1.08638e-17	1.65721e-14	0.6316	chr11:111272783	rs10891241	A	G	11:111272783_A/G	11	734	233	0.317439	111272783
chr11_111265020_A_G_b38	ENSG00000196167	8.618	2.093e-16	3.02709e-13	0.602722	chr11:111265020	rs11213809	A	G	11:111265020_A/G	11	734	229	0.311989	111265020
chr11_111248969_T_C_b38	ENSG00000196167	-8.59408	2.48926e-16	3.54996e-13	-0.642896	chr11:111248969	rs11213801	T	C	11:111248969_T/C	11	734	196	0.26703	111248969
chr11_111249973_C_T_b38	ENSG00000196167	-8.59408	2.48926e-16	3.54996e-13	-0.642896	chr11:111249973	rs10891239	C	T	11:111249973_C/T	11	734	196	0.26703	111249973
chr11_111254787_G_A_b38	ENSG00000196167	8.59488	2.47483e-16	3.54996e-13	0.601832	chr11:111254787	rs2001754	G	A	11:111254787_G/A	11	734	230	0.313351	111254787
chr11_111309665_C_A_b38	ENSG00000196167	-7.64234	1.90089e-13	2.02375e-10	-0.57028	chr11:111309665	rs11213825	C	A	11:111309665_C/A	11	734	213	0.290191	111309665
chr11_111309906_T_A_b38	ENSG00000196167	-7.64234	1.90089e-13	2.02375e-10	-0.57028	chr11:111309906	rs7933961	T	A	11:111309906_T/A	11	734	213	0.290191	111309906
chr11_111262280_C_T_b38	ENSG00000196167	7.63734	1.96557e-13	2.07817e-10	0.51844	chr11:111262280	rs7116087	C	T	11:111262280_C/T	11	734	262	0.356948	111262280
chr11_111310405_A_G_b38	ENSG00000196167	-7.35665	1.25594e-12	1.2264e-09	-0.545196	chr11:111310405	rs7947849	A	G	11:111310405_A/G	11	734	215	0.292916	111310405
chr11_111265875_T_TA_b38	ENSG00000196167	6.46223	3.30472e-10	2.35645e-07	0.487574	chr11:111265875	rs201448592	T	TA	11:111265875_T/TA	11	734	301	0.410082	111265875
chr11_111344939_G_A_b38	ENSG00000196167	-6.28781	9.20082e-10	6.14619e-07	-0.446434	chr11:111344939	rs7117229	G	A	11:111344939_G/A	11	734	340	0.463215	111344939
chr11_111333946_A_G_b38	ENSG00000196167	-6.25105	1.13857e-09	7.33406e-07	-0.445167	chr11:111333946	rs2003311	A	G	11:111333946_A/G	11	734	341	0.464578	111333946
chr11_111344789_C_T_b38	ENSG00000196167	-6.2109	1.43537e-09	9.00012e-07	-0.448227	chr11:111344789	rs7116894	C	T	11:111344789_C/T	11	734	346	0.47139	111344789
chr11_111344526_A_G_b38	ENSG00000196167	-6.20567	1.47924e-09	9.25622e-07	-0.442244	chr11:111344526	rs7113329	A	G	11:111344526_A/G	11	734	341	0.464578	111344526
chr11_111316873_A_G_b38	ENSG00000196167	-6.17645	1.74939e-09	1.08361e-06	-0.449423	chr11:111316873	rs12807413	A	G	11:111316873_A/G	11	734	266	0.362398	111316873
chr11_111329456_G_A_b38	ENSG00000196167	-6.16652	1.85181e-09	1.13667e-06	-0.436931	chr11:111329456	rs7102180	G	A	11:111329456_G/A	11	734	352	0.479564	111329456
chr11_111349280_G_T_b38	ENSG00000196167	-6.16565	1.861e-09	1.13667e-06	-0.438586	chr11:111349280	rs11213846	G	T	11:111349280_G/T	11	734	340	0.463215	111349280
chr11_111349569_C_T_b38	ENSG00000196167	-6.16565	1.861e-09	1.13667e-06	-0.438586	chr11:111349569	rs12803281	C	T	11:111349569_C/T	11	734	340	0.463215	111349569
chr11_111349585_C_T_b38	ENSG00000196167	-6.16565	1.861e-09	1.13667e-06	-0.438586	chr11:111349585	rs12803295	C	T	11:111349585_C/T	11	734	340	0.463215	111349585
chr11_111349736_G_A_b38	ENSG00000196167	-6.16565	1.861e-09	1.13667e-06	-0.438586	chr11:111349736	rs7481296	G	A	11:111349736_G/A	11	734	340	0.463215	111349736
chr11_111352386_A_G_b38	ENSG00000196167	-6.16565	1.861e-09	1.13667e-06	-0.438586	chr11:111352386	rs1042752	A	G	11:111352386_A/G	11	734	340	0.463215	111352386
chr11_111352720_G_A_b38	ENSG00000196167	-6.16565	1.861e-09	1.13667e-06	-0.438586	chr11:111352720	rs12417556	G	A	11:111352720_G/A	11	734	340	0.463215	111352720
chr11_111326673_A_G_b38	ENSG00000196167	-6.11948	2.42201e-09	1.46474e-06	-0.436391	chr11:111326673	rs7122754	A	G	11:111326673_A/G	11	734	352	0.479564	111326673
chr11_111327185_A_G_b38	ENSG00000196167	-6.11948	2.42201e-09	1.46474e-06	-0.436391	chr11:111327185	rs7944897	A	G	11:111327185_A/G	11	734	352	0.479564	111327185
chr11_111311727_G_T_b38	ENSG00000196167	-6.07223	3.16669e-09	1.87805e-06	-0.440507	chr11:111311727	rs10891248	G	T	11:111311727_G/T	11	734	267	0.36376	111311727
chr11_111311905_T_C_b38	ENSG00000196167	-6.07223	3.16669e-09	1.87805e-06	-0.440507	chr11:111311905	rs10891249	T	C	11:111311905_T/C	11	734	267	0.36376	111311905
chr11_111312967_C_T_b38	ENSG00000196167	-6.07223	3.16669e-09	1.87805e-06	-0.440507	chr11:111312967	rs10891250	C	T	11:111312967_C/T	11	734	267	0.36376	111312967
chr11_111313669_A_G_b38	ENSG00000196167	-6.07223	3.16669e-09	1.87805e-06	-0.440507	chr11:111313669	rs11213828	A	G	11:111313669_A/G	11	734	267	0.36376	111313669
chr11_111313948_T_C_b38	ENSG00000196167	-6.07223	3.16669e-09	1.87805e-06	-0.440507	chr11:111313948	rs11213829	T	C	11:111313948_T/C	11	734	267	0.36376	111313948
chr11_111314726_A_G_b38	ENSG00000196167	-6.07223	3.16669e-09	1.87805e-06	-0.440507	chr11:111314726	rs7938622	A	G	11:111314726_A/G	11	734	267	0.36376	111314726
chr11_111316185_G_A_b38	ENSG00000196167	-6.07223	3.16669e-09	1.87805e-06	-0.440507	chr11:111316185	rs10891253	G	A	11:111316185_G/A	11	734	267	0.36376	111316185
chr11_111330777_G_A_b38	ENSG00000196167	-6.06024	3.38876e-09	1.97913e-06	-0.432771	chr11:111330777	rs7932421	G	A	11:111330777_G/A	11	734	350	0.476839	111330777
chr11_111331707_G_A_b38	ENSG00000196167	-6.06024	3.38876e-09	1.97913e-06	-0.432771	chr11:111331707	rs4512889	G	A	11:111331707_G/A	11	734	350	0.476839	111331707
chr11_111331761_C_T_b38	ENSG00000196167	-6.06024	3.38876e-09	1.97913e-06	-0.432771	chr11:111331761	rs1893990	C	T	11:111331761_C/T	11	734	350	0.476839	111331761
chr11_111336173_T_A_b38	ENSG00000196167	-6.06024	3.38876e-09	1.97913e-06	-0.432771	chr11:111336173	rs7946549	T	A	11:111336173_T/A	11	734	350	0.476839	111336173
chr11_111336380_G_A_b38	ENSG00000196167	-6.06024	3.38876e-09	1.97913e-06	-0.432771	chr11:111336380	rs7931938	G	A	11:111336380_G/A	11	734	350	0.476839	111336380
chr11_111337593_A_T_b38	ENSG00000196167	-6.06024	3.38876e-09	1.97913e-06	-0.432771	chr11:111337593	rs7116848	A	T	11:111337593_A/T	11	734	350	0.476839	111337593
chr11_111337793_T_C_b38	ENSG00000196167	-6.06024	3.38876e-09	1.97913e-06	-0.432771	chr11:111337793	rs1893993	T	C	11:111337793_T/C	11	734	350	0.476839	111337793
chr11_111338110_C_T_b38	ENSG00000196167	-6.06024	3.38876e-09	1.97913e-06	-0.432771	chr11:111338110	rs7117592	C	T	11:111338110_C/T	11	734	350	0.476839	111338110
chr11_111386477_C_T_b38	ENSG00000196167	-6.01544	4.3614e-09	2.50547e-06	-0.432665	chr11:111386477	rs12800302	C	T	11:111386477_C/T	11	734	324	0.441417	111386477
chr11_111333268_A_T_b38	ENSG00000196167	-6.0044	4.64031e-09	2.65445e-06	-0.427806	chr11:111333268	rs2003313	A	T	11:111333268_A/T	11	734	351	0.478202	111333268
chr11_111317996_T_C_b38	ENSG00000196167	-5.98558	5.15613e-09	2.90081e-06	-0.434205	chr11:111317996	rs10891255	T	C	11:111317996_T/C	11	734	266	0.362398	111317996
chr11_111318433_A_G_b38	ENSG00000196167	-5.98558	5.15613e-09	2.90081e-06	-0.434205	chr11:111318433	rs10749971	A	G	11:111318433_A/G	11	734	266	0.362398	111318433
chr11_111318709_A_T_b38	ENSG00000196167	-5.98558	5.15613e-09	2.90081e-06	-0.434205	chr11:111318709	rs10749972	A	T	11:111318709_A/T	11	734	266	0.362398	111318709
chr11_111318718_A_G_b38	ENSG00000196167	-5.98558	5.15613e-09	2.90081e-06	-0.434205	chr11:111318718	rs10749973	A	G	11:111318718_A/G	11	734	266	0.362398	111318718
chr11_111320365_A_C_b38	ENSG00000196167	-5.98558	5.15613e-09	2.90081e-06	-0.434205	chr11:111320365	rs2002180	A	C	11:111320365_A/C	11	734	266	0.362398	111320365
chr11_111286858_AT_A_b38	ENSG00000196167	5.9679	5.69137e-09	3.17861e-06	0.462339	chr11:111286858	chr11:111286858	AT	A	11:111286858_AT/A	11	734	276	0.376022	111286858
chr11_111289904_A_C_b38	ENSG00000196167	5.92072	7.40019e-09	4.00177e-06	0.460198	chr11:111289904	rs17092444	A	C	11:111289904_A/C	11	734	178	0.242507	111289904
chr11_111292165_A_T_b38	ENSG00000196167	5.92072	7.40019e-09	4.00177e-06	0.460198	chr11:111292165	rs4356266	A	T	11:111292165_A/T	11	734	178	0.242507	111292165
chr11_111293072_A_G_b38	ENSG00000196167	5.92072	7.40019e-09	4.00177e-06	0.460198	chr11:111293072	rs78234435	A	G	11:111293072_A/G	11	734	178	0.242507	111293072
chr11_111293926_T_C_b38	ENSG00000196167	5.92072	7.40019e-09	4.00177e-06	0.460198	chr11:111293926	rs11213821	T	C	11:111293926_T/C	11	734	178	0.242507	111293926
chr11_111295215_G_T_b38	ENSG00000196167	5.92072	7.40019e-09	4.00177e-06	0.460198	chr11:111295215	rs10891244	G	T	11:111295215_G/T	11	734	178	0.242507	111295215
chr11_111298042_C_T_b38	ENSG00000196167	5.92072	7.40019e-09	4.00177e-06	0.460198	chr11:111298042	rs7127721	C	T	11:111298042_C/T	11	734	178	0.242507	111298042
chr11_111332334_T_G_b38	ENSG00000196167	-5.91063	7.82595e-09	4.19501e-06	-0.424916	chr11:111332334	rs7951890	T	G	11:111332334_T/G	11	734	356	0.485014	111332334
chr11_111293388_C_A_b38	ENSG00000196167	5.90442	8.09987e-09	4.32671e-06	0.455889	chr11:111293388	rs56160097	C	A	11:111293388_C/A	11	734	180	0.245232	111293388
chr11_111297067_T_G_b38	ENSG00000196167	5.90442	8.09987e-09	4.32671e-06	0.455889	chr11:111297067	rs10891245	T	G	11:111297067_T/G	11	734	180	0.245232	111297067
chr11_111313450_TA_T_b38	ENSG00000196167	-5.89872	8.35942e-09	4.44985e-06	-0.426905	chr11:111313450	chr11:111313450	TA	T	11:111313450_TA/T	11	734	276	0.376022	111313450
chr11_111314663_G_A_b38	ENSG00000196167	-5.89872	8.35942e-09	4.44985e-06	-0.426905	chr11:111314663	rs7938881	G	A	11:111314663_G/A	11	734	276	0.376022	111314663
chr11_111310924_A_C_b38	ENSG00000196167	-5.86325	1.01666e-08	5.36527e-06	-0.426322	chr11:111310924	rs7130102	A	C	11:111310924_A/C	11	734	257	0.350136	111310924
chr11_111333872_C_G_b38	ENSG00000196167	-5.85589	1.05872e-08	5.52071e-06	-0.420036	chr11:111333872	rs2003312	C	G	11:111333872_C/G	11	734	357	0.486376	111333872
chr11_111420812_C_A_b38	ENSG00000196167	5.67128	2.88628e-08	1.45078e-05	0.514431	chr11:111420812	rs61896853	C	A	11:111420812_C/A	11	734	153	0.208447	111420812
chr11_111382943_A_AGT_b38	ENSG00000196167	-5.62865	3.62544e-08	1.79872e-05	-0.410983	chr11:111382943	chr11:111382943	A	AGT	11:111382943_A/AGT	11	734	312	0.425068	111382943
chr11_111301339_C_G_b38	ENSG00000196167	5.60755	4.05661e-08	2.00292e-05	0.441576	chr11:111301339	rs12575395	C	G	11:111301339_C/G	11	734	169	0.230245	111301339
chr11_111303258_GAC_G_b38	ENSG00000196167	5.60755	4.05661e-08	2.00292e-05	0.441576	chr11:111303258	rs3833764	GAC	G	11:111303258_GAC/G	11	734	169	0.230245	111303258
chr11_111304031_C_A_b38	ENSG00000196167	5.60755	4.05661e-08	2.00292e-05	0.441576	chr11:111304031	rs7123095	C	A	11:111304031_C/A	11	734	169	0.230245	111304031
chr11_111427974_C_T_b38	ENSG00000196167	5.55431	5.37836e-08	2.63853e-05	0.523488	chr11:111427974	rs4938597	C	T	11:111427974_C/T	11	734	144	0.196185	111427974
chr11_111268350_A_G_b38	ENSG00000196167	5.5413	5.75998e-08	2.80332e-05	0.440066	chr11:111268350	rs9633936	A	G	11:111268350_A/G	11	734	167	0.22752	111268350
chr11_111269737_A_G_b38	ENSG00000196167	5.5413	5.75998e-08	2.80332e-05	0.440066	chr11:111269737	rs10891240	A	G	11:111269737_A/G	11	734	167	0.22752	111269737
chr11_111271053_T_C_b38	ENSG00000196167	5.5413	5.75998e-08	2.80332e-05	0.440066	chr11:111271053	rs34926143	T	C	11:111271053_T/C	11	734	167	0.22752	111271053
chr11_111275991_T_C_b38	ENSG00000196167	5.5413	5.75998e-08	2.80332e-05	0.440066	chr11:111275991	rs10789821	T	C	11:111275991_T/C	11	734	167	0.22752	111275991
chr11_111289670_G_A_b38	ENSG00000196167	5.54006	5.79794e-08	2.81732e-05	0.440428	chr11:111289670	rs12577869	G	A	11:111289670_G/A	11	734	164	0.223433	111289670
chr11_111345616_C_A_b38	ENSG00000196167	5.49374	7.39377e-08	3.55334e-05	0.421396	chr11:111345616	rs59514954	C	A	11:111345616_C/A	11	734	223	0.303815	111345616
chr11_111255290_C_G_b38	ENSG00000196167	5.47547	8.13425e-08	3.88485e-05	0.447333	chr11:111255290	rs11213803	C	G	11:111255290_C/G	11	734	154	0.209809	111255290
chr11_111252970_A_G_b38	ENSG00000196167	5.465	8.59061e-08	4.0711e-05	0.446812	chr11:111252970	rs11213802	A	G	11:111252970_A/G	11	734	153	0.208447	111252970
chr11_111253762_T_C_b38	ENSG00000196167	5.465	8.59061e-08	4.0711e-05	0.446812	chr11:111253762	rs1986684	T	C	11:111253762_T/C	11	734	153	0.208447	111253762
chr11_111246412_A_T_b38	ENSG00000196167	5.46157	8.74566e-08	4.13818e-05	0.454215	chr11:111246412	rs12803934	A	T	11:111246412_A/T	11	734	150	0.20436	111246412
chr11_111330344_G_C_b38	ENSG00000196167	-5.45906	8.8608e-08	4.17976e-05	-0.390824	chr11:111330344	rs7929076	G	C	11:111330344_G/C	11	734	280	0.381471	111330344
chr11_111341014_T_C_b38	ENSG00000196167	5.43305	1.01428e-07	4.74796e-05	0.41695	chr11:111341014	rs7116100	T	C	11:111341014_T/C	11	734	231	0.314714	111341014
chr11_111350238_C_A_b38	ENSG00000196167	-5.4071	1.16011e-07	5.38132e-05	-0.385203	chr11:111350238	rs4641517	C	A	11:111350238_C/A	11	734	280	0.381471	111350238
chr11_111351988_G_A_b38	ENSG00000196167	-5.4071	1.16011e-07	5.38132e-05	-0.385203	chr11:111351988	rs10502143	G	A	11:111351988_G/A	11	734	280	0.381471	111351988
chr11_111331728_C_G_b38	ENSG00000196167	-5.40483	1.1738e-07	5.42021e-05	-0.375406	chr11:111331728	rs1893988	C	G	11:111331728_C/G	11	734	332	0.452316	111331728
chr11_111331753_A_G_b38	ENSG00000196167	-5.40483	1.1738e-07	5.42021e-05	-0.375406	chr11:111331753	rs1893989	A	G	11:111331753_A/G	11	734	332	0.452316	111331753
chr11_111336349_A_G_b38	ENSG00000196167	-5.40483	1.1738e-07	5.42021e-05	-0.375406	chr11:111336349	rs7931570	A	G	11:111336349_A/G	11	734	332	0.452316	111336349
chr11_111281538_ACT_A_b38	ENSG00000196167	5.38727	1.2851e-07	5.81164e-05	0.425651	chr11:111281538	chr11:111281538	ACT	A	11:111281538_ACT/A	11	734	168	0.228883	111281538
chr11_111281664_G_T_b38	ENSG00000196167	5.38727	1.2851e-07	5.81164e-05	0.425651	chr11:111281664	rs4636709	G	T	11:111281664_G/T	11	734	168	0.228883	111281664
chr11_111343907_A_G_b38	ENSG00000196167	-5.38129	1.32523e-07	5.97261e-05	-0.382939	chr11:111343907	rs11213841	A	G	11:111343907_A/G	11	734	279	0.380109	111343907
chr11_111348925_T_G_b38	ENSG00000196167	-5.3811	1.32654e-07	5.97261e-05	-0.382927	chr11:111348925	rs11213845	T	G	11:111348925_T/G	11	734	279	0.380109	111348925
chr11_111246759_T_C_b38	ENSG00000196167	5.37786	1.34888e-07	6.06432e-05	0.439445	chr11:111246759	rs11213798	T	C	11:111246759_T/C	11	734	156	0.212534	111246759
chr11_111248595_A_G_b38	ENSG00000196167	5.36714	1.42523e-07	6.34244e-05	0.43888	chr11:111248595	rs11213800	A	G	11:111248595_A/G	11	734	155	0.211172	111248595
chr11_111343219_G_A_b38	ENSG00000196167	-5.35937	1.48323e-07	6.59101e-05	-0.383196	chr11:111343219	rs12365324	G	A	11:111343219_G/A	11	734	282	0.384196	111343219
chr11_111326212_C_T_b38	ENSG00000196167	-5.33478	1.68232e-07	7.43259e-05	-0.362905	chr11:111326212	rs10891256	C	T	11:111326212_C/T	11	734	348	0.474114	111326212
chr11_111340067_A_T_b38	ENSG00000196167	5.32655	1.75451e-07	7.70714e-05	0.409031	chr11:111340067	rs7126039	A	T	11:111340067_A/T	11	734	230	0.313351	111340067
chr11_111341072_C_T_b38	ENSG00000196167	5.32655	1.75451e-07	7.70714e-05	0.409031	chr11:111341072	rs7130334	C	T	11:111341072_C/T	11	734	230	0.313351	111341072
chr11_111385943_C_T_b38	ENSG00000196167	-5.32402	1.77736e-07	7.79632e-05	-0.383877	chr11:111385943	rs7127806	C	T	11:111385943_C/T	11	734	263	0.358311	111385943
chr11_111327051_C_T_b38	ENSG00000196167	5.30894	1.91931e-07	8.38302e-05	0.412553	chr11:111327051	rs7944798	C	T	11:111327051_C/T	11	734	219	0.298365	111327051
chr11_111330441_C_A_b38	ENSG00000196167	-5.30069	2.00167e-07	8.64422e-05	-0.376796	chr11:111330441	rs7929013	C	A	11:111330441_C/A	11	734	285	0.388283	111330441
chr11_111331839_G_T_b38	ENSG00000196167	-5.30069	2.00167e-07	8.64422e-05	-0.376796	chr11:111331839	rs1893991	G	T	11:111331839_G/T	11	734	285	0.388283	111331839
chr11_111336956_G_C_b38	ENSG00000196167	-5.30069	2.00167e-07	8.64422e-05	-0.376796	chr11:111336956	rs4296070	G	C	11:111336956_G/C	11	734	285	0.388283	111336956
chr11_111338198_T_C_b38	ENSG00000196167	-5.30069	2.00167e-07	8.64422e-05	-0.376796	chr11:111338198	rs35349974	T	C	11:111338198_T/C	11	734	285	0.388283	111338198
chr11_111340909_C_A_b38	ENSG00000196167	-5.30069	2.00167e-07	8.64422e-05	-0.376796	chr11:111340909	rs12364442	C	A	11:111340909_C/A	11	734	285	0.388283	111340909
chr11_111342457_C_T_b38	ENSG00000196167	5.30187	1.9897e-07	8.64422e-05	0.40694	chr11:111342457	rs7104680	C	T	11:111342457_C/T	11	734	229	0.311989	111342457
chr11_111389477_C_T_b38	ENSG00000196167	-5.29298	2.08165e-07	8.96438e-05	-0.376413	chr11:111389477	rs883326	C	T	11:111389477_C/T	11	734	344	0.468665	111389477
chr11_111350557_C_T_b38	ENSG00000196167	5.26669	2.37844e-07	0.000101287	0.439924	chr11:111350557	rs10502139	C	T	11:111350557_C/T	11	734	160	0.217984	111350557
chr11_111350665_T_A_b38	ENSG00000196167	5.26669	2.37844e-07	0.000101287	0.439924	chr11:111350665	rs10502140	T	A	11:111350665_T/A	11	734	160	0.217984	111350665
chr11_111245754_G_A_b38	ENSG00000196167	5.25784	2.48724e-07	0.000105773	0.418621	chr11:111245754	rs1568202	G	A	11:111245754_G/A	11	734	172	0.234332	111245754
chr11_111334213_A_G_b38	ENSG00000196167	5.23951	2.72827e-07	0.0001131	0.438263	chr11:111334213	rs12574149	A	G	11:111334213_A/G	11	734	158	0.215259	111334213
chr11_111341644_G_A_b38	ENSG00000196167	5.23951	2.72827e-07	0.0001131	0.438263	chr11:111341644	rs12785346	G	A	11:111341644_G/A	11	734	158	0.215259	111341644
chr11_111341841_C_A_b38	ENSG00000196167	5.23951	2.72827e-07	0.0001131	0.438263	chr11:111341841	rs56115808	C	A	11:111341841_C/A	11	734	158	0.215259	111341841
chr11_111342034_G_A_b38	ENSG00000196167	5.23951	2.72827e-07	0.0001131	0.438263	chr11:111342034	rs35389890	G	A	11:111342034_G/A	11	734	158	0.215259	111342034
chr11_111364595_G_T_b38	ENSG00000196167	5.23766	2.75382e-07	0.0001131	0.43633	chr11:111364595	rs45486198	G	T	11:111364595_G/T	11	734	152	0.207084	111364595
chr11_111408402_G_A_b38	ENSG00000196167	5.23204	2.83292e-07	0.000114593	0.471262	chr11:111408402	rs56180416	G	A	11:111408402_G/A	11	734	159	0.216621	111408402
chr11_111347175_T_G_b38	ENSG00000196167	5.19182	3.46638e-07	0.000135049	0.435289	chr11:111347175	rs35106034	T	G	11:111347175_T/G	11	734	155	0.211172	111347175
chr11_111347639_C_A_b38	ENSG00000196167	5.19182	3.46638e-07	0.000135049	0.435289	chr11:111347639	rs34999255	C	A	11:111347639_C/A	11	734	155	0.211172	111347639
chr11_111346623_G_A_b38	ENSG00000196167	5.18844	3.52548e-07	0.000137004	0.423621	chr11:111346623	rs4144344	G	A	11:111346623_G/A	11	734	163	0.222071	111346623
chr11_111349443_G_A_b38	ENSG00000196167	5.18776	3.53744e-07	0.000137295	0.430291	chr11:111349443	rs7112282	G	A	11:111349443_G/A	11	734	161	0.219346	111349443
chr11_111404525_T_C_b38	ENSG00000196167	5.18624	3.56439e-07	0.000138166	0.467149	chr11:111404525	rs4938535	T	C	11:111404525_T/C	11	734	160	0.217984	111404525
chr11_111344222_G_A_b38	ENSG00000196167	5.17377	3.79332e-07	0.00014575	0.399487	chr11:111344222	rs4938488	G	A	11:111344222_G/A	11	734	234	0.318801	111344222
chr11_111436183_C_T_b38	ENSG00000196167	5.15421	4.1816e-07	0.000158484	0.494984	chr11:111436183	rs7930326	C	T	11:111436183_C/T	11	734	141	0.192098	111436183
chr11_111250395_C_T_b38	ENSG00000196167	5.1519	4.22973e-07	0.000160111	0.427924	chr11:111250395	rs7939539	C	T	11:111250395_C/T	11	734	147	0.200272	111250395
chr11_111348623_G_A_b38	ENSG00000196167	5.13858	4.51898e-07	0.000170638	0.42669	chr11:111348623	rs35971924	G	A	11:111348623_G/A	11	734	160	0.217984	111348623
chr11_111305626_C_T_b38	ENSG00000196167	5.11204	5.15353e-07	0.000192466	0.399118	chr11:111305626	rs12792445	C	T	11:111305626_C/T	11	734	179	0.243869	111305626
chr11_111333424_A_G_b38	ENSG00000196167	-5.09724	5.54407e-07	0.000204559	-0.361113	chr11:111333424	rs2003314	A	G	11:111333424_A/G	11	734	295	0.401907	111333424
chr11_111336155_T_C_b38	ENSG00000196167	5.09642	5.56642e-07	0.000204891	0.429857	chr11:111336155	rs17471196	T	C	11:111336155_T/C	11	734	148	0.201635	111336155
chr11_111338199_G_A_b38	ENSG00000196167	5.09642	5.56642e-07	0.000204891	0.429857	chr11:111338199	rs4938475	G	A	11:111338199_G/A	11	734	148	0.201635	111338199
chr11_111247019_C_A_b38	ENSG00000196167	5.08509	5.88592e-07	0.000215359	0.411774	chr11:111247019	rs11213799	C	A	11:111247019_C/A	11	734	170	0.231608	111247019
chr11_111247113_C_T_b38	ENSG00000196167	5.08509	5.88592e-07	0.000215359	0.411774	chr11:111247113	rs35759288	C	T	11:111247113_C/T	11	734	170	0.231608	111247113
chr11_111266084_C_T_b38	ENSG00000196167	5.08186	5.98005e-07	0.000218542	0.402941	chr11:111266084	rs11213811	C	T	11:111266084_C/T	11	734	170	0.231608	111266084
chr11_111410197_A_G_b38	ENSG00000196167	5.07741	6.11233e-07	0.000222316	0.453973	chr11:111410197	rs6589230	A	G	11:111410197_A/G	11	734	160	0.217984	111410197
chr11_111261286_CACACACAT_C_b38	ENSG00000196167	5.06759	6.41418e-07	0.000232193	0.430317	chr11:111261286	chr11:111261286	CACACACAT	C	11:111261286_CACACACAT/C	11	734	150	0.20436	111261286
chr11_111351502_G_A_b38	ENSG00000196167	5.00274	8.80271e-07	0.000304976	0.393711	chr11:111351502	rs45611937	G	A	11:111351502_G/A	11	734	182	0.247956	111351502
chr11_111352680_G_A_b38	ENSG00000196167	5.00274	8.80271e-07	0.000304976	0.393711	chr11:111352680	rs11213847	G	A	11:111352680_G/A	11	734	182	0.247956	111352680
chr11_111352791_A_G_b38	ENSG00000196167	5.00274	8.80271e-07	0.000304976	0.393711	chr11:111352791	rs11825875	A	G	11:111352791_A/G	11	734	182	0.247956	111352791
chr11_111327494_G_T_b38	ENSG00000196167	4.99295	9.23048e-07	0.000319075	0.412905	chr11:111327494	rs4420303	G	T	11:111327494_G/T	11	734	157	0.213896	111327494
chr11_111419757_G_T_b38	ENSG00000196167	4.95963	1.08444e-06	0.00036539	0.412089	chr11:111419757	rs57797362	G	T	11:111419757_G/T	11	734	217	0.29564	111419757
chr11_111401376_G_A_b38	ENSG00000196167	4.95346	1.11714e-06	0.000375583	0.422874	chr11:111401376	rs4938532	G	A	11:111401376_G/A	11	734	180	0.245232	111401376
chr11_111401355_G_A_b38	ENSG00000196167	4.90151	1.43327e-06	0.000475094	0.41875	chr11:111401355	rs61896843	G	A	11:111401355_G/A	11	734	179	0.243869	111401355
chr11_111401839_G_A_b38	ENSG00000196167	4.88373	1.56012e-06	0.000513372	0.413964	chr11:111401839	rs12362765	G	A	11:111401839_G/A	11	734	182	0.247956	111401839
chr11_111411694_G_C_b38	ENSG00000196167	4.88368	1.56047e-06	0.000513372	0.455435	chr11:111411694	rs4938546	G	C	11:111411694_G/C	11	734	155	0.211172	111411694
chr11_111404257_T_C_b38	ENSG00000196167	-4.86587	1.69833e-06	0.000553971	-0.366079	chr11:111404257	rs11213876	T	C	11:111404257_T/C	11	734	284	0.386921	111404257
chr11_111245075_T_TA_b38	ENSG00000196167	4.84717	1.85581e-06	0.000599596	0.357148	chr11:111245075	rs28595215	T	TA	11:111245075_T/TA	11	734	214	0.291553	111245075
chr11_111401675_C_T_b38	ENSG00000196167	4.79359	2.3888e-06	0.000766952	0.409993	chr11:111401675	rs17577003	C	T	11:111401675_C/T	11	734	183	0.249319	111401675
chr11_111361534_C_T_b38	ENSG00000196167	-4.77867	2.56174e-06	0.000819045	-0.345252	chr11:111361534	rs1815949	C	T	11:111361534_C/T	11	734	268	0.365123	111361534
chr11_111320015_AT_A_b38	ENSG00000196167	-4.7721	2.64165e-06	0.000839343	-0.33693	chr11:111320015	rs200050852	AT	A	11:111320015_AT/A	11	734	315	0.429155	111320015
chr11_111430319_G_A_b38	ENSG00000196167	4.74596	2.98416e-06	0.000935569	0.434876	chr11:111430319	rs10891268	G	A	11:111430319_G/A	11	734	156	0.212534	111430319
chr11_111411904_A_G_b38	ENSG00000196167	-4.71148	3.50176e-06	0.0010547	-0.396354	chr11:111411904	rs11213878	A	G	11:111411904_A/G	11	734	207	0.282016	111411904
chr11_111250082_C_G_b38	ENSG00000196167	4.7027	3.6468e-06	0.00108982	0.367451	chr11:111250082	rs7939167	C	G	11:111250082_C/G	11	734	200	0.27248	111250082
chr11_111402858_TTAA_T_b38	ENSG00000196167	-4.64191	4.82195e-06	0.00138564	-0.352789	chr11:111402858	chr11:111402858	TTAA	T	11:111402858_TTAA/T	11	734	281	0.382834	111402858
chr11_111325894_G_A_b38	ENSG00000196167	4.54072	7.62571e-06	0.00204563	0.357208	chr11:111325894	rs4938459	G	A	11:111325894_G/A	11	734	192	0.26158	111325894
chr11_111348310_G_A_b38	ENSG00000196167	4.53709	7.75084e-06	0.00207375	0.343954	chr11:111348310	rs12577316	G	A	11:111348310_G/A	11	734	225	0.30654	111348310
chr11_111405143_T_C_b38	ENSG00000196167	4.51242	8.65562e-06	0.00228001	0.383467	chr11:111405143	rs11213877	T	C	11:111405143_T/C	11	734	207	0.282016	111405143
chr11_111328474_C_T_b38	ENSG00000196167	4.50494	8.94958e-06	0.0023534	0.413204	chr11:111328474	rs34664097	C	T	11:111328474_C/T	11	734	124	0.168937	111328474
chr11_111325955_T_C_b38	ENSG00000196167	-4.48939	9.59126e-06	0.00250282	-0.301346	chr11:111325955	rs7104509	T	C	11:111325955_T/C	11	734	332	0.452316	111325955
chr11_111412385_GTTTC_G_b38	ENSG00000196167	-4.44566	1.16417e-05	0.00296716	-0.332326	chr11:111412385	rs115959381	GTTTC	G	11:111412385_GTTTC/G	11	734	288	0.392371	111412385
chr11_111426618_TCA_T_b38	ENSG00000196167	4.37909	1.55886e-05	0.00387646	0.366667	chr11:111426618	chr11:111426618	TCA	T	11:111426618_TCA/T	11	734	218	0.297003	111426618
chr11_111392423_C_T_b38	ENSG00000196167	4.34831	1.78193e-05	0.00433967	0.526542	chr11:111392423	rs113205403	C	T	11:111392423_C/T	11	734	68	0.0926431	111392423
chr11_111303892_T_TA_b38	ENSG00000196167	4.28928	2.29811e-05	0.00534217	0.374297	chr11:111303892	chr11:111303892	T	TA	11:111303892_T/TA	11	734	160	0.217984	111303892
chr11_111424537_C_T_b38	ENSG00000196167	4.27866	2.40492e-05	0.00555258	0.358414	chr11:111424537	rs4938583	C	T	11:111424537_C/T	11	734	217	0.29564	111424537
chr11_111405000_C_T_b38	ENSG00000196167	-4.19946	3.36576e-05	0.00753423	-0.317782	chr11:111405000	rs10891260	C	T	11:111405000_C/T	11	734	271	0.36921	111405000
chr11_111339368_CTT_C_b38	ENSG00000196167	4.19479	3.43258e-05	0.00765438	0.306155	chr11:111339368	chr11:111339368	CTT	C	11:111339368_CTT/C	11	734	286	0.389646	111339368
chr11_111340785_G_A_b38	ENSG00000196167	4.19479	3.43258e-05	0.00765438	0.306155	chr11:111340785	rs7130155	G	A	11:111340785_G/A	11	734	286	0.389646	111340785
chr11_111418745_G_C_b38	ENSG00000196167	-4.18875	3.52101e-05	0.00781745	-0.33405	chr11:111418745	rs12795129	G	C	11:111418745_G/C	11	734	217	0.29564	111418745
chr11_111416620_G_A_b38	ENSG00000196167	-4.17962	3.65848e-05	0.00811092	-0.309632	chr11:111416620	rs4259858	G	A	11:111416620_G/A	11	734	334	0.455041	111416620
chr11_111415796_T_G_b38	ENSG00000196167	-4.17403	3.74534e-05	0.00823865	-0.307404	chr11:111415796	rs4261318	T	G	11:111415796_T/G	11	734	329	0.448229	111415796
chr11_111415804_C_G_b38	ENSG00000196167	-4.17403	3.74534e-05	0.00823865	-0.307404	chr11:111415804	rs4268541	C	G	11:111415804_C/G	11	734	329	0.448229	111415804
chr11_111426574_C_T_b38	ENSG00000196167	-4.15716	4.01928e-05	0.00873401	-0.317879	chr11:111426574	rs2068856	C	T	11:111426574_C/T	11	734	292	0.39782	111426574
chr11_111340966_C_A_b38	ENSG00000196167	4.15401	4.07238e-05	0.00883061	0.302834	chr11:111340966	rs7130200	C	A	11:111340966_C/A	11	734	285	0.388283	111340966
chr11_111412872_A_G_b38	ENSG00000196167	-4.14914	4.15596e-05	0.00899912	-0.337595	chr11:111412872	rs11213880	A	G	11:111412872_A/G	11	734	215	0.292916	111412872
chr11_111308329_A_G_b38	ENSG00000196167	-4.11039	4.88196e-05	0.0102743	-0.278893	chr11:111308329	rs3087587	A	G	11:111308329_A/G	11	734	366	0.498638	111308329
chr11_111416210_A_G_b38	ENSG00000196167	-4.10378	5.01719e-05	0.010472	-0.303162	chr11:111416210	rs10789827	A	G	11:111416210_A/G	11	734	330	0.449591	111416210
chr11_111416432_T_C_b38	ENSG00000196167	-4.10378	5.01719e-05	0.010472	-0.303162	chr11:111416432	rs4415806	T	C	11:111416432_T/C	11	734	330	0.449591	111416432
chr11_111426193_G_A_b38	ENSG00000196167	4.09931	5.11073e-05	0.0106237	0.339957	chr11:111426193	rs4938590	G	A	11:111426193_G/A	11	734	221	0.30109	111426193
chr11_111416635_GC_G_b38	ENSG00000196167	-4.09666	5.16706e-05	0.0106686	-0.301958	chr11:111416635	chr11:111416635	GC	G	11:111416635_GC/G	11	734	329	0.448229	111416635
chr11_111419461_T_C_b38	ENSG00000196167	-4.03536	6.64418e-05	0.0130506	-0.32058	chr11:111419461	rs11213885	T	C	11:111419461_T/C	11	734	219	0.298365	111419461
chr11_111415890_A_G_b38	ENSG00000196167	-4.03039	6.78005e-05	0.0132159	-0.327604	chr11:111415890	rs7127521	A	G	11:111415890_A/G	11	734	211	0.287466	111415890
chr11_111412945_A_C_b38	ENSG00000196167	-4.01532	7.2085e-05	0.0139359	-0.321895	chr11:111412945	rs11213881	A	C	11:111412945_A/C	11	734	222	0.302452	111412945
chr11_111311005_G_A_b38	ENSG00000196167	4.00217	7.60316e-05	0.0146159	0.342395	chr11:111311005	rs11213826	G	A	11:111311005_G/A	11	734	158	0.215259	111311005
chr11_111411329_T_C_b38	ENSG00000196167	-3.99554	7.81002e-05	0.0149573	-0.297318	chr11:111411329	rs7115223	T	C	11:111411329_T/C	11	734	317	0.43188	111411329
chr11_111408176_G_C_b38	ENSG00000196167	-3.9894	8.00611e-05	0.0152851	-0.301139	chr11:111408176	rs10891262	G	C	11:111408176_G/C	11	734	276	0.376022	111408176
chr11_112245561_G_A_b38	ENSG00000196167	-3.93148	0.000101017	0.0187602	-1.11765	chr11:112245561	chr11:112245561	G	A	11:112245561_G/A	11	734	12	0.0163488	112245561
chr11_111427528_G_A_b38	ENSG00000196167	3.88126	0.000123302	0.022397	0.321536	chr11:111427528	rs4938593	G	A	11:111427528_G/A	11	734	226	0.307902	111427528
chr11_111430282_G_A_b38	ENSG00000196167	3.86352	0.000132232	0.0237498	0.317225	chr11:111430282	rs10891267,rs386757480	G	A	11:111430282_G/A	11	734	232	0.316076	111430282
chr11_111265875_TA_T_b38	ENSG00000196167	-3.84751	0.000140813	0.0249856	-1.19584	chr11:111265875	rs201448592	TA	T	11:111265875_TA/T	11	734	10	0.013624	111265875
chr11_111425054_T_C_b38	ENSG00000196167	3.83266	0.000149244	0.026284	0.3174	chr11:111425054	rs4938586	T	C	11:111425054_T/C	11	734	225	0.30654	111425054
chr11_111309445_T_C_b38	ENSG00000196167	-3.81894	0.000157449	0.0274451	-0.25834	chr11:111309445	rs2002560	T	C	11:111309445_T/C	11	734	353	0.480926	111309445
chr11_111404151_A_G_b38	ENSG00000196167	-3.8125	0.000161446	0.0279695	-0.28193	chr11:111404151	rs7121760	A	G	11:111404151_A/G	11	734	324	0.441417	111404151
chr11_111428260_G_A_b38	ENSG00000196167	-3.80851	0.000163976	0.0279695	-0.309162	chr11:111428260	rs11213890	G	A	11:111428260_G/A	11	734	203	0.276567	111428260
chr11_111439424_T_G_b38	ENSG00000196167	-3.80949	0.000163348	0.0279695	-0.676012	chr11:111439424	rs77111683	T	G	11:111439424_T/G	11	734	28	0.0381471	111439424
chr11_111410183_C_CT_b38	ENSG00000196167	-3.79923	0.000169991	0.028733	-0.319467	chr11:111410183	chr11:111410183	C	CT	11:111410183_C/CT	11	734	257	0.350136	111410183
chr11_111429076_T_G_b38	ENSG00000196167	3.78999	0.000176188	0.0295138	0.313088	chr11:111429076	rs2156724	T	G	11:111429076_T/G	11	734	230	0.313351	111429076
chr11_111432651_TAAAG_T_b38	ENSG00000196167	-3.79033	0.000175959	0.0295138	-0.303355	chr11:111432651	chr11:111432651	TAAAG	T	11:111432651_TAAAG/T	11	734	216	0.294278	111432651
chr11_111427372_C_T_b38	ENSG00000196167	3.7704	0.000190046	0.0310777	0.311697	chr11:111427372	rs4938592	C	T	11:111427372_C/T	11	734	222	0.302452	111427372
chr11_111430099_T_G_b38	ENSG00000196167	3.7673	0.000192333	0.0314015	0.311376	chr11:111430099	rs4938608	T	G	11:111430099_T/G	11	734	244	0.332425	111430099
chr11_111434036_C_A_b38	ENSG00000196167	3.74951	0.000205946	0.033446	0.289176	chr11:111434036	rs11213894	C	A	11:111434036_C/A	11	734	268	0.365123	111434036
chr11_111427997_T_C_b38	ENSG00000196167	3.72048	0.000230143	0.0367909	0.291065	chr11:111427997	rs4938599	T	C	11:111427997_T/C	11	734	273	0.371935	111427997
chr11_111645817_A_AT_b38	ENSG00000196167	-3.69441	0.000254132	0.0400002	-1.01288	chr11:111645817	rs150065971	A	AT	11:111645817_A/AT	11	734	13	0.0177112	111645817
chr11_111825823_G_A_b38	ENSG00000196167	-3.69441	0.000254132	0.0400002	-1.01288	chr11:111825823	rs148806712	G	A	11:111825823_G/A	11	734	13	0.0177112	111825823
chr11_111308948_T_C_b38	ENSG00000196167	-3.64765	0.000303165	0.0461313	-0.245431	chr11:111308948	rs7930041	T	C	11:111308948_T/C	11	734	352	0.479564	111308948
chr11_111310408_G_A_b38	ENSG00000196167	-3.60917	0.000350048	0.0521524	-0.24475	chr11:111310408	rs7948150	G	A	11:111310408_G/A	11	734	351	0.478202	111310408
chr11_111310395_C_T_b38	ENSG00000196167	-3.59795	0.000364953	0.0536432	-0.244469	chr11:111310395	rs7947952	C	T	11:111310395_C/T	11	734	354	0.482289	111310395
chr11_111308665_A_G_b38	ENSG00000196167	3.58512	0.000382718	0.0559059	0.273078	chr11:111308665	rs1046872	A	G	11:111308665_A/G	11	734	234	0.318801	111308665
chr11_111312968_G_A_b38	ENSG00000196167	3.57616	0.000395609	0.0572978	0.308378	chr11:111312968	rs10891251	G	A	11:111312968_G/A	11	734	152	0.207084	111312968
chr11_111314088_G_T_b38	ENSG00000196167	3.57616	0.000395609	0.0572978	0.308378	chr11:111314088	rs7113243	G	T	11:111314088_G/T	11	734	152	0.207084	111314088
chr11_111318543_G_A_b38	ENSG00000196167	3.57616	0.000395609	0.0572978	0.308378	chr11:111318543	rs35201780	G	A	11:111318543_G/A	11	734	152	0.207084	111318543
chr11_111323172_C_T_b38	ENSG00000196167	3.57616	0.000395609	0.0572978	0.308378	chr11:111323172	rs11213833	C	T	11:111323172_C/T	11	734	152	0.207084	111323172
chr11_111427573_A_G_b38	ENSG00000196167	3.57189	0.000401888	0.0581247	0.280742	chr11:111427573	rs4938594	A	G	11:111427573_A/G	11	734	275	0.374659	111427573
chr11_111261260_TACACAC_T_b38	ENSG00000196167	3.54755	0.000439538	0.0628291	0.300614	chr11:111261260	chr11:111261260	TACACAC	T	11:111261260_TACACAC/T	11	734	190	0.258856	111261260
chr11_111323177_C_T_b38	ENSG00000196167	3.53107	0.000466893	0.0662145	0.304828	chr11:111323177	rs11213834	C	T	11:111323177_C/T	11	734	151	0.205722	111323177
chr11_111433473_C_G_b38	ENSG00000196167	-3.51283	0.000499008	0.0700445	-0.282502	chr11:111433473	rs12807309	C	G	11:111433473_C/G	11	734	207	0.282016	111433473
chr11_111977411_G_A_b38	ENSG00000196167	3.51262	0.000499382	0.0700445	0.675725	chr11:111977411	rs75508818	G	A	11:111977411_G/A	11	734	23	0.0313351	111977411
chr11_112018671_C_G_b38	ENSG00000196167	3.51262	0.000499382	0.0700445	0.675725	chr11:112018671	rs74373890	C	G	11:112018671_C/G	11	734	23	0.0313351	112018671
chr11_112057329_C_T_b38	ENSG00000196167	3.51262	0.000499382	0.0700445	0.675725	chr11:112057329	rs4937001	C	T	11:112057329_C/T	11	734	23	0.0313351	112057329
chr11_112109017_C_G_b38	ENSG00000196167	3.51262	0.000499382	0.0700445	0.675725	chr11:112109017	rs76460663	C	G	11:112109017_C/G	11	734	23	0.0313351	112109017
chr11_111500147_AT_A_b38	ENSG00000196167	-3.48991	0.000542284	0.0750325	-0.637229	chr11:111500147	rs552574242	AT	A	11:111500147_AT/A	11	734	31	0.0422343	111500147
chr11_111428926_T_C_b38	ENSG00000196167	3.48229	0.000557446	0.076716	0.281223	chr11:111428926	rs2156722	T	C	11:111428926_T/C	11	734	246	0.33515	111428926
chr11_111325286_C_T_b38	ENSG00000196167	3.47515	0.000572004	0.0785421	0.30154	chr11:111325286	rs7107344	C	T	11:111325286_C/T	11	734	145	0.197548	111325286
chr11_111430057_T_G_b38	ENSG00000196167	3.45855	0.000607238	0.0827501	0.277785	chr11:111430057	rs4936453	T	G	11:111430057_T/G	11	734	247	0.336512	111430057
chr11_111148076_G_A_b38	ENSG00000196167	-3.44251	0.00064319	0.0867624	-0.856412	chr11:111148076	rs73021558	G	A	11:111148076_G/A	11	734	16	0.0217984	111148076
chr11_111433141_T_C_b38	ENSG00000196167	3.43553	0.000659443	0.0886817	0.262184	chr11:111433141	rs17578003	T	C	11:111433141_T/C	11	734	315	0.429155	111433141
chr11_111510637_C_CT_b38	ENSG00000196167	3.35679	0.000871482	0.108313	0.811938	chr11:111510637	chr11:111510637	C	CT	11:111510637_C/CT	11	734	17	0.0231608	111510637
chr11_111946111_AT_A_b38	ENSG00000196167	3.34676	0.000902634	0.110395	0.473202	chr11:111946111	chr11:111946111	AT	A	11:111946111_AT/A	11	734	56	0.0762943	111946111
chr11_111382943_A_AGTGTGTGTGT_b38	ENSG00000196167	3.30108	0.00105813	0.125314	0.535611	chr11:111382943	chr11:111382943	A	AGTGTGTGTGT	11:111382943_A/AGTGTGTGTGT	11	734	38	0.0517711	111382943
chr11_111428613_G_A_b38	ENSG00000196167	3.28739	0.00110939	0.130477	0.266575	chr11:111428613	rs7130116	G	A	11:111428613_G/A	11	734	242	0.3297	111428613
chr11_111429042_G_A_b38	ENSG00000196167	3.28739	0.00110939	0.130477	0.266575	chr11:111429042	rs2156723	G	A	11:111429042_G/A	11	734	242	0.3297	111429042
chr11_111429789_G_A_b38	ENSG00000196167	3.28739	0.00110939	0.130477	0.266575	chr11:111429789	rs10891265	G	A	11:111429789_G/A	11	734	242	0.3297	111429789
chr11_111429940_T_TTTG_b38	ENSG00000196167	3.28739	0.00110939	0.130477	0.266575	chr11:111429940	rs113699141	T	TTTG	11:111429940_T/TTTG	11	734	242	0.3297	111429940
chr11_110766588_T_C_b38	ENSG00000196167	-3.27656	0.00115154	0.133546	-0.901797	chr11:110766588	rs118069550	T	C	11:110766588_T/C	11	734	13	0.0177112	110766588
chr11_111382943_A_AGTGTGTGT_b38	ENSG00000196167	3.23621	0.00132204	0.148102	0.303919	chr11:111382943	chr11:111382943	A	AGTGTGTGT	11:111382943_A/AGTGTGTGT	11	734	123	0.167575	111382943
chr11_112229950_C_A_b38	ENSG00000196167	-3.2173	0.00140974	0.155429	-0.885941	chr11:112229950	rs76051337	C	A	11:112229950_C/A	11	734	13	0.0177112	112229950
chr11_112245360_A_G_b38	ENSG00000196167	-3.2173	0.00140974	0.155429	-0.885941	chr11:112245360	rs1960532	A	G	11:112245360_A/G	11	734	13	0.0177112	112245360
chr11_111429185_A_G_b38	ENSG00000196167	3.1936	0.00152725	0.164451	0.258897	chr11:111429185	rs2156725	A	G	11:111429185_A/G	11	734	241	0.328338	111429185
chr11_111429557_A_G_b38	ENSG00000196167	3.1936	0.00152725	0.164451	0.258897	chr11:111429557	rs10789835	A	G	11:111429557_A/G	11	734	241	0.328338	111429557
chr11_111429696_C_T_b38	ENSG00000196167	3.1936	0.00152725	0.164451	0.258897	chr11:111429696	rs10789836	C	T	11:111429696_C/T	11	734	241	0.328338	111429696
chr11_111760199_C_T_b38	ENSG00000196167	3.15694	0.00172699	0.17787	0.619955	chr11:111760199	rs77277356	C	T	11:111760199_C/T	11	734	22	0.0299728	111760199
chr11_111767344_A_T_b38	ENSG00000196167	3.15694	0.00172699	0.17787	0.619955	chr11:111767344	rs77827985	A	T	11:111767344_A/T	11	734	22	0.0299728	111767344
chr11_111784549_C_T_b38	ENSG00000196167	3.15694	0.00172699	0.17787	0.619955	chr11:111784549	rs45620134	C	T	11:111784549_C/T	11	734	22	0.0299728	111784549
chr11_111437668_C_T_b38	ENSG00000196167	-3.10956	0.00202087	0.19988	-0.260629	chr11:111437668	rs7115710	C	T	11:111437668_C/T	11	734	191	0.260218	111437668
chr11_111262296_T_G_b38	ENSG00000196167	3.07651	0.00225245	0.217522	0.725955	chr11:111262296	rs74811177	T	G	11:111262296_T/G	11	734	18	0.0245232	111262296
chr11_111430283_T_C_b38	ENSG00000196167	3.03291	0.00259535	0.239258	0.231669	chr11:111430283	rs7942549	T	C	11:111430283_T/C	11	734	353	0.480926	111430283
chr11_111430034_A_G_b38	ENSG00000196167	3.03189	0.00260394	0.239576	0.230007	chr11:111430034	rs4938607	A	G	11:111430034_A/G	11	734	357	0.486376	111430034
chr11_111506585_A_T_b38	ENSG00000196167	3.03216	0.0026016	0.239576	0.60702	chr11:111506585	rs4329721	A	T	11:111506585_A/T	11	734	21	0.0286104	111506585
chr11_111283058_C_CTT_b38	ENSG00000196167	3.01698	0.00273216	0.246315	0.257497	chr11:111283058	chr11:111283058	C	CTT	11:111283058_C/CTT	11	734	115	0.156676	111283058
chr11_111431285_T_A_b38	ENSG00000196167	3.00062	0.00287951	0.255739	0.228422	chr11:111431285	rs1944932	T	A	11:111431285_T/A	11	734	356	0.485014	111431285
chr11_110806102_C_T_b38	ENSG00000196167	-2.99624	0.00292013	0.256371	-0.797642	chr11:110806102	rs117414310	C	T	11:110806102_C/T	11	734	14	0.0190736	110806102
chr11_111284577_C_T_b38	ENSG00000196167	2.99087	0.0029707	0.258546	0.232824	chr11:111284577	rs7930251	C	T	11:111284577_C/T	11	734	223	0.303815	111284577
chr11_111429800_C_A_b38	ENSG00000196167	2.98017	0.00307386	0.26415	0.230077	chr11:111429800	rs10891266	C	A	11:111429800_C/A	11	734	341	0.464578	111429800
chr11_111331574_G_A_b38	ENSG00000196167	2.97591	0.00311587	0.266491	0.63937	chr11:111331574	rs111648564	G	A	11:111331574_G/A	11	734	22	0.0299728	111331574
chr11_111443279_G_A_b38	ENSG00000196167	-2.96005	0.00327676	0.274398	-0.248364	chr11:111443279	rs7107639	G	A	11:111443279_G/A	11	734	190	0.258856	111443279
chr11_110347815_C_G_b38	ENSG00000196167	2.95502	0.00332942	0.277027	0.594947	chr11:110347815	rs55770928	C	G	11:110347815_C/G	11	734	23	0.0313351	110347815
chr11_111311177_CGT_C_b38	ENSG00000196167	2.95371	0.00334329	0.277654	0.255015	chr11:111311177	rs145073421,rs199493648	CGT	C	11:111311177_CGT/C	11	734	159	0.216621	111311177
chr11_111297819_G_T_b38	ENSG00000196167	2.95302	0.00335051	0.277953	0.533952	chr11:111297819	rs45583336	G	T	11:111297819_G/T	11	734	32	0.0435967	111297819
chr11_111429319_C_T_b38	ENSG00000196167	2.92642	0.00364356	0.293914	0.223627	chr11:111429319	rs10789833	C	T	11:111429319_C/T	11	734	355	0.483651	111429319
chr11_111429401_G_A_b38	ENSG00000196167	2.92642	0.00364356	0.293914	0.223627	chr11:111429401	rs10789834	G	A	11:111429401_G/A	11	734	355	0.483651	111429401
chr11_111692694_T_A_b38	ENSG00000196167	2.92519	0.00365767	0.29482	0.586103	chr11:111692694	rs17474471	T	A	11:111692694_T/A	11	734	21	0.0286104	111692694
chr11_111710419_A_T_b38	ENSG00000196167	2.92519	0.00365767	0.29482	0.586103	chr11:111710419	rs45524342	A	T	11:111710419_A/T	11	734	21	0.0286104	111710419
chr11_111311177_C_CGT_b38	ENSG00000196167	-2.91405	0.00378761	0.301332	-0.229578	chr11:111311177	rs145073421,rs199493648	C	CGT	11:111311177_C/CGT	11	734	363	0.49455	111311177
chr11_111500148_T_A_b38	ENSG00000196167	2.91215	0.00381022	0.302233	0.457464	chr11:111500148	rs657092	T	A	11:111500148_T/A	11	734	44	0.0599455	111500148
chr11_111482837_G_GAA_b38	ENSG00000196167	-2.90386	0.0039101	0.308199	-0.725708	chr11:111482837	chr11:111482837	G	GAA	11:111482837_G/GAA	11	734	16	0.0217984	111482837
chr11_111314720_T_C_b38	ENSG00000196167	2.89652	0.00400062	0.31364	0.249627	chr11:111314720	rs10891252	T	C	11:111314720_T/C	11	734	150	0.20436	111314720
chr11_111891089_GGT_G_b38	ENSG00000196167	2.87242	0.00431137	0.32851	0.470489	chr11:111891089	chr11:111891089	GGT	G	11:111891089_GGT/G	11	734	40	0.0544959	111891089
chr11_110620306_T_A_b38	ENSG00000196167	-2.85485	0.00455164	0.340141	-0.693408	chr11:110620306	rs192860803	T	A	11:110620306_T/A	11	734	17	0.0231608	110620306
chr11_111290416_C_T_b38	ENSG00000196167	2.84873	0.00463808	0.344515	0.221856	chr11:111290416	rs4533073	C	T	11:111290416_C/T	11	734	222	0.302452	111290416
chr11_111291331_G_A_b38	ENSG00000196167	2.84873	0.00463808	0.344515	0.221856	chr11:111291331	rs7942622	G	A	11:111291331_G/A	11	734	222	0.302452	111291331
chr11_112245548_C_T_b38	ENSG00000196167	-2.84155	0.00474158	0.348141	-0.891104	chr11:112245548	rs142050390	C	T	11:112245548_C/T	11	734	10	0.013624	112245548
chr11_111278907_G_C_b38	ENSG00000196167	2.84066	0.00475441	0.348581	0.202622	chr11:111278907	rs7934982	G	C	11:111278907_G/C	11	734	298	0.405995	111278907
chr11_111443996_C_T_b38	ENSG00000196167	-2.83569	0.00482751	0.351877	-0.236338	chr11:111443996	rs72645432	C	T	11:111443996_C/T	11	734	186	0.253406	111443996
chr11_111462655_G_A_b38	ENSG00000196167	2.82762	0.00494811	0.355821	0.569859	chr11:111462655	rs112065305	G	A	11:111462655_G/A	11	734	23	0.0313351	111462655
chr11_110262591_G_A_b38	ENSG00000196167	-2.81196	0.00519002	0.363579	-0.882024	chr11:110262591	rs77266005	G	A	11:110262591_G/A	11	734	10	0.013624	110262591
chr11_112059051_TAA_T_b38	ENSG00000196167	2.80786	0.00525507	0.365493	0.77575	chr11:112059051	chr11:112059051	TAA	T	11:112059051_TAA/T	11	734	13	0.0177112	112059051
chr11_110378373_T_G_b38	ENSG00000196167	-2.80576	0.00528878	0.367355	-0.88012	chr11:110378373	rs180763220	T	G	11:110378373_T/G	11	734	10	0.013624	110378373
chr11_111631216_G_A_b38	ENSG00000196167	-2.80371	0.00532171	0.368831	-0.539371	chr11:111631216	rs77346371	G	A	11:111631216_G/A	11	734	28	0.0381471	111631216
chr11_111733070_C_G_b38	ENSG00000196167	-2.7829	0.00566768	0.381178	-0.526914	chr11:111733070	rs75461705	C	G	11:111733070_C/G	11	734	29	0.0395095	111733070
chr11_111865258_G_A_b38	ENSG00000196167	-2.7829	0.00566768	0.381178	-0.526914	chr11:111865258	rs45574638	G	A	11:111865258_G/A	11	734	29	0.0395095	111865258
chr11_111894859_T_G_b38	ENSG00000196167	-2.7829	0.00566768	0.381178	-0.526914	chr11:111894859	rs146308904	T	G	11:111894859_T/G	11	734	29	0.0395095	111894859
chr11_111503609_C_T_b38	ENSG00000196167	-2.77229	0.00585174	0.387299	-0.206481	chr11:111503609	rs955744	C	T	11:111503609_C/T	11	734	315	0.429155	111503609
chr11_110895092_A_G_b38	ENSG00000196167	2.76475	0.0059859	0.392087	0.281998	chr11:110895092	rs73020025	A	G	11:110895092_A/G	11	734	118	0.160763	110895092
chr11_112161075_C_CT_b38	ENSG00000196167	2.75674	0.00613136	0.39791	0.514049	chr11:112161075	rs34546088	C	CT	11:112161075_C/CT	11	734	30	0.0408719	112161075
chr11_110888844_CT_C_b38	ENSG00000196167	2.75066	0.00624385	0.400094	0.346807	chr11:110888844	chr11:110888844	CT	C	11:110888844_CT/C	11	734	76	0.103542	110888844
chr11_111530884_G_A_b38	ENSG00000196167	-2.7474	0.00630492	0.402583	-0.294484	chr11:111530884	rs11602450	G	A	11:111530884_G/A	11	734	106	0.144414	111530884
chr11_111457182_G_A_b38	ENSG00000196167	2.73417	0.00655859	0.411139	0.55141	chr11:111457182	rs78975669	G	A	11:111457182_G/A	11	734	23	0.0313351	111457182
chr11_112036153_A_ATG_b38	ENSG00000196167	2.73201	0.00660091	0.413141	0.724972	chr11:112036153	rs12800504,rs139271036	A	ATG	11:112036153_A/ATG	11	734	12	0.0163488	112036153
chr11_112118892_C_A_b38	ENSG00000196167	-2.73101	0.00662053	0.413178	-0.506451	chr11:112118892	rs117334584	C	A	11:112118892_C/A	11	734	28	0.0381471	112118892
chr11_111263832_C_T_b38	ENSG00000196167	-2.704	0.00717177	0.431762	-0.747627	chr11:111263832	rs117687862	C	T	11:111263832_C/T	11	734	13	0.0177112	111263832
chr11_111971724_GTATATC_G_b38	ENSG00000196167	2.69599	0.00734299	0.435486	0.695951	chr11:111971724	rs200576752	GTATATC	G	11:111971724_GTATATC/G	11	734	15	0.020436	111971724
chr11_111983413_GGGA_G_b38	ENSG00000196167	2.69318	0.00740396	0.438001	0.550941	chr11:111983413	chr11:111983413	GGGA	G	11:111983413_GGGA/G	11	734	20	0.027248	111983413
chr11_111459420_C_T_b38	ENSG00000196167	2.67729	0.00775707	0.451006	0.550511	chr11:111459420	rs77651758	C	T	11:111459420_C/T	11	734	22	0.0299728	111459420
chr11_111257361_C_CT_b38	ENSG00000196167	2.67656	0.00777378	0.451344	0.398842	chr11:111257361	chr11:111257361	C	CT	11:111257361_C/CT	11	734	50	0.0681199	111257361
chr11_111304313_TTAAA_T_b38	ENSG00000196167	2.66477	0.00804595	0.4577	0.210813	chr11:111304313	chr11:111304313	TTAAA	T	11:111304313_TTAAA/T	11	734	197	0.268392	111304313
chr11_110983126_G_A_b38	ENSG00000196167	-2.64318	0.00856704	0.465991	-0.925501	chr11:110983126	rs7926871	G	A	11:110983126_G/A	11	734	8	0.0108992	110983126
chr11_110984155_T_G_b38	ENSG00000196167	-2.64318	0.00856704	0.465991	-0.925501	chr11:110984155	rs75696081	T	G	11:110984155_T/G	11	734	8	0.0108992	110984155
chr11_111401283_G_A_b38	ENSG00000196167	2.64296	0.00857255	0.46604	0.546614	chr11:111401283	rs143704091	G	A	11:111401283_G/A	11	734	24	0.0326975	111401283
chr11_111311477_C_G_b38	ENSG00000196167	2.63851	0.00868362	0.468588	0.222678	chr11:111311477	rs7130969	C	G	11:111311477_C/G	11	734	164	0.223433	111311477
chr11_111315928_C_T_b38	ENSG00000196167	2.63851	0.00868362	0.468588	0.222678	chr11:111315928	rs12801181	C	T	11:111315928_C/T	11	734	164	0.223433	111315928
chr11_111319979_C_A_b38	ENSG00000196167	2.63851	0.00868362	0.468588	0.222678	chr11:111319979	rs11213832	C	A	11:111319979_C/A	11	734	164	0.223433	111319979
chr11_110372421_C_T_b38	ENSG00000196167	2.63061	0.00888433	0.47204	0.619512	chr11:110372421	rs111956903	C	T	11:110372421_C/T	11	734	16	0.0217984	110372421
chr11_111163400_TACAC_T_b38	ENSG00000196167	2.62383	0.00905968	0.475738	0.520041	chr11:111163400	chr11:111163400	TACAC	T	11:111163400_TACAC/T	11	734	24	0.0326975	111163400
chr11_111490228_G_A_b38	ENSG00000196167	2.61666	0.00924841	0.480445	0.182792	chr11:111490228	rs646030	G	A	11:111490228_G/A	11	734	345	0.470027	111490228
chr11_112235067_AT_A_b38	ENSG00000196167	2.61631	0.0092578	0.480463	0.380637	chr11:112235067	chr11:112235067	AT	A	11:112235067_AT/A	11	734	53	0.0722071	112235067
chr11_110287954_T_C_b38	ENSG00000196167	2.61617	0.00926136	0.480566	0.475836	chr11:110287954	rs17654297	T	C	11:110287954_T/C	11	734	27	0.0367847	110287954
chr11_111459239_CA_C_b38	ENSG00000196167	2.60997	0.00942779	0.485027	0.368875	chr11:111459239	chr11:111459239	CA	C	11:111459239_CA/C	11	734	54	0.0735695	111459239

## Sheet: POU2AF3_cis-eQTLs
snps	gene	statistic	pvalue	FDR	beta	marker	rsid	REF	ALT	markerID	chr	nAllele	Count	Frequency	POS
chr11_111286111_T_C_b38	ENSG00000214290	14.895	1.55097e-39	2.37775e-34	0.934945	chr11:111286111	rs3087967	T	C	11:111286111_T/C	11	734	228	0.310627	111286111
chr11_111286502_T_TAAAAC_b38	ENSG00000214290	14.9544	8.91744e-40	2.37775e-34	0.924045	chr11:111286502	rs71461518	T	TAAAAC	11:111286502_T/TAAAAC	11	734	234	0.318801	111286502
chr11_111300346_T_C_b38	ENSG00000214290	14.6701	1.25288e-38	3.84151e-34	0.91303	chr11:111300346	rs7122375	T	C	11:111300346_T/C	11	734	234	0.318801	111300346
chr11_111300921_T_G_b38	ENSG00000214290	14.6701	1.25288e-38	3.84151e-34	0.91303	chr11:111300921	rs3802840	T	G	11:111300921_T/G	11	734	234	0.318801	111300921
chr11_111300947_G_T_b38	ENSG00000214290	14.6701	1.25288e-38	3.84151e-34	0.91303	chr11:111300947	rs3802841	G	T	11:111300947_G/T	11	734	234	0.318801	111300947
chr11_111300984_C_A_b38	ENSG00000214290	14.6701	1.25288e-38	3.84151e-34	0.91303	chr11:111300984	rs3802842	C	A	11:111300984_C/A	11	734	234	0.318801	111300984
chr11_111301454_T_C_b38	ENSG00000214290	14.6701	1.25288e-38	3.84151e-34	0.91303	chr11:111301454	rs4608113	T	C	11:111301454_T/C	11	734	234	0.318801	111301454
chr11_111301485_A_G_b38	ENSG00000214290	14.6701	1.25288e-38	3.84151e-34	0.91303	chr11:111301485	rs4520624	A	G	11:111301485_A/G	11	734	234	0.318801	111301485
chr11_111301511_ATGTGCAATG_A_b38	ENSG00000214290	14.6701	1.25288e-38	3.84151e-34	0.91303	chr11:111301511	chr11:111301511	ATGTGCAATG	A	11:111301511_ATGTGCAATG/A	11	734	234	0.318801	111301511
chr11_111301678_T_C_b38	ENSG00000214290	14.6701	1.25288e-38	3.84151e-34	0.91303	chr11:111301678	rs10789823	T	C	11:111301678_T/C	11	734	234	0.318801	111301678
chr11_111302186_G_C_b38	ENSG00000214290	14.6015	2.36519e-38	6.59273e-34	0.886532	chr11:111302186	rs6589219	G	C	11:111302186_G/C	11	734	245	0.333787	111302186
chr11_111290028_C_T_b38	ENSG00000214290	14.534	4.41733e-38	9.02943e-34	0.903591	chr11:111290028	rs4477469	C	T	11:111290028_C/T	11	734	236	0.321526	111290028
chr11_111291966_A_G_b38	ENSG00000214290	14.534	4.41733e-38	9.02943e-34	0.903591	chr11:111291966	rs10789822	A	G	11:111291966_A/G	11	734	236	0.321526	111291966
chr11_111294284_C_T_b38	ENSG00000214290	14.534	4.41733e-38	9.02943e-34	0.903591	chr11:111294284	rs7103178	C	T	11:111294284_C/T	11	734	236	0.321526	111294284
chr11_111302565_C_T_b38	ENSG00000214290	14.5451	3.98474e-38	9.02943e-34	0.885261	chr11:111302565	rs6589220	C	T	11:111302565_C/T	11	734	246	0.33515	111302565
chr11_111299815_A_G_b38	ENSG00000214290	14.4887	6.7164e-38	1.28709e-33	0.921082	chr11:111299815	rs10891246	A	G	11:111299815_A/G	11	734	231	0.314714	111299815
chr11_111283347_A_C_b38	ENSG00000214290	14.42	1.26614e-37	2.28362e-33	0.901616	chr11:111283347	rs7130173	A	C	11:111283347_A/C	11	734	232	0.316076	111283347
chr11_111289766_T_C_b38	ENSG00000214290	14.3349	2.77481e-37	4.72664e-33	0.896502	chr11:111289766	rs11213820	T	C	11:111289766_T/C	11	734	237	0.322888	111289766
chr11_111299265_T_C_b38	ENSG00000214290	14.2957	3.98356e-37	6.42851e-33	0.894502	chr11:111299265	rs11213823	T	C	11:111299265_T/C	11	734	243	0.331063	111299265
chr11_111296832_A_C_b38	ENSG00000214290	14.0511	3.76735e-36	5.25055e-32	0.861093	chr11:111296832	rs6589218	A	C	11:111296832_A/C	11	734	252	0.343324	111296832
chr11_111297051_C_G_b38	ENSG00000214290	14.0511	3.76735e-36	5.25055e-32	0.861093	chr11:111297051	rs7944895	C	G	11:111297051_C/G	11	734	252	0.343324	111297051
chr11_111300019_C_T_b38	ENSG00000214290	14.0511	3.76735e-36	5.25055e-32	0.861093	chr11:111300019	rs7105857	C	T	11:111300019_C/T	11	734	252	0.343324	111300019
chr11_111295779_G_A_b38	ENSG00000214290	13.9429	1.01467e-35	1.35266e-31	0.853638	chr11:111295779	rs12296076	G	A	11:111295779_G/A	11	734	254	0.346049	111295779
chr11_111269318_C_G_b38	ENSG00000214290	12.7714	3.931e-31	5.02208e-27	0.802632	chr11:111269318	rs4548657	C	G	11:111269318_C/G	11	734	246	0.33515	111269318
chr11_111269217_C_T_b38	ENSG00000214290	12.6947	7.76374e-31	9.52188e-27	0.800093	chr11:111269217	rs36029541	C	T	11:111269217_C/T	11	734	247	0.336512	111269217
chr11_111281771_C_G_b38	ENSG00000214290	12.6284	1.39544e-30	1.64562e-26	0.79719	chr11:111281771	rs1987128	C	G	11:111281771_C/G	11	734	247	0.336512	111281771
chr11_111269214_A_AC_b38	ENSG00000214290	12.6091	1.65486e-30	1.87928e-26	0.806653	chr11:111269214	rs59942963,rs77037348	A	AC	11:111269214_A/AC	11	734	242	0.3297	111269214
chr11_111272783_A_G_b38	ENSG00000214290	12.176	7.40968e-29	8.11397e-25	0.795096	chr11:111272783	rs10891241	A	G	11:111272783_A/G	11	734	233	0.317439	111272783
chr11_111248969_T_C_b38	ENSG00000214290	-10.9354	2.88087e-24	1.57735e-20	-0.778493	chr11:111248969	rs11213801	T	C	11:111248969_T/C	11	734	196	0.26703	111248969
chr11_111249973_C_T_b38	ENSG00000214290	-10.9354	2.88087e-24	1.57735e-20	-0.778493	chr11:111249973	rs10891239	C	T	11:111249973_C/T	11	734	196	0.26703	111249973
chr11_111265020_A_G_b38	ENSG00000214290	10.7877	9.78355e-24	4.83834e-20	0.720714	chr11:111265020	rs11213809	A	G	11:111265020_A/G	11	734	229	0.311989	111265020
chr11_111254787_G_A_b38	ENSG00000214290	10.5838	5.21632e-23	2.19096e-19	0.710852	chr11:111254787	rs2001754	G	A	11:111254787_G/A	11	734	230	0.313351	111254787
chr11_111262280_C_T_b38	ENSG00000214290	9.88862	1.38194e-20	4.36826e-17	0.64201	chr11:111262280	rs7116087	C	T	11:111262280_C/T	11	734	262	0.356948	111262280
chr11_111309665_C_A_b38	ENSG00000214290	-9.04383	9.0886e-18	1.39335e-14	-0.656962	chr11:111309665	rs11213825	C	A	11:111309665_C/A	11	734	213	0.290191	111309665
chr11_111309906_T_A_b38	ENSG00000214290	-9.04383	9.0886e-18	1.39335e-14	-0.656962	chr11:111309906	rs7933961	T	A	11:111309906_T/A	11	734	213	0.290191	111309906
chr11_111310405_A_G_b38	ENSG00000214290	-8.38645	1.10658e-15	1.54928e-12	-0.609831	chr11:111310405	rs7947849	A	G	11:111310405_A/G	11	734	215	0.292916	111310405
chr11_111344789_C_T_b38	ENSG00000214290	-8.00348	1.62803e-14	1.90525e-11	-0.560181	chr11:111344789	rs7116894	C	T	11:111344789_C/T	11	734	346	0.47139	111344789
chr11_111333946_A_G_b38	ENSG00000214290	-7.90125	3.29008e-14	3.80674e-11	-0.547097	chr11:111333946	rs2003311	A	G	11:111333946_A/G	11	734	341	0.464578	111333946
chr11_111344939_G_A_b38	ENSG00000214290	-7.84231	4.92189e-14	5.63104e-11	-0.542276	chr11:111344939	rs7117229	G	A	11:111344939_G/A	11	734	340	0.463215	111344939
chr11_111386477_C_T_b38	ENSG00000214290	-7.8396	5.01366e-14	5.71472e-11	-0.546905	chr11:111386477	rs12800302	C	T	11:111386477_C/T	11	734	324	0.441417	111386477
chr11_111344526_A_G_b38	ENSG00000214290	-7.81526	5.91722e-14	6.71964e-11	-0.542001	chr11:111344526	rs7113329	A	G	11:111344526_A/G	11	734	341	0.464578	111344526
chr11_111329456_G_A_b38	ENSG00000214290	-7.7114	1.19533e-13	1.32558e-10	-0.532416	chr11:111329456	rs7102180	G	A	11:111329456_G/A	11	734	352	0.479564	111329456
chr11_111349280_G_T_b38	ENSG00000214290	-7.71059	1.20187e-13	1.32558e-10	-0.534453	chr11:111349280	rs11213846	G	T	11:111349280_G/T	11	734	340	0.463215	111349280
chr11_111349569_C_T_b38	ENSG00000214290	-7.71059	1.20187e-13	1.32558e-10	-0.534453	chr11:111349569	rs12803281	C	T	11:111349569_C/T	11	734	340	0.463215	111349569
chr11_111349585_C_T_b38	ENSG00000214290	-7.71059	1.20187e-13	1.32558e-10	-0.534453	chr11:111349585	rs12803295	C	T	11:111349585_C/T	11	734	340	0.463215	111349585
chr11_111349736_G_A_b38	ENSG00000214290	-7.71059	1.20187e-13	1.32558e-10	-0.534453	chr11:111349736	rs7481296	G	A	11:111349736_G/A	11	734	340	0.463215	111349736
chr11_111352386_A_G_b38	ENSG00000214290	-7.71059	1.20187e-13	1.32558e-10	-0.534453	chr11:111352386	rs1042752	A	G	11:111352386_A/G	11	734	340	0.463215	111352386
chr11_111352720_G_A_b38	ENSG00000214290	-7.71059	1.20187e-13	1.32558e-10	-0.534453	chr11:111352720	rs12417556	G	A	11:111352720_G/A	11	734	340	0.463215	111352720
chr11_111265875_T_TA_b38	ENSG00000214290	7.69157	1.36606e-13	1.4959e-10	0.5683	chr11:111265875	rs201448592	T	TA	11:111265875_T/TA	11	734	301	0.410082	111265875
chr11_111326673_A_G_b38	ENSG00000214290	-7.66515	1.63139e-13	1.75792e-10	-0.532695	chr11:111326673	rs7122754	A	G	11:111326673_A/G	11	734	352	0.479564	111326673
chr11_111327185_A_G_b38	ENSG00000214290	-7.66515	1.63139e-13	1.75792e-10	-0.532695	chr11:111327185	rs7944897	A	G	11:111327185_A/G	11	734	352	0.479564	111327185
chr11_111332334_T_G_b38	ENSG00000214290	-7.66491	1.634e-13	1.75792e-10	-0.535323	chr11:111332334	rs7951890	T	G	11:111332334_T/G	11	734	356	0.485014	111332334
chr11_111333872_C_G_b38	ENSG00000214290	-7.63977	1.9339e-13	2.05176e-10	-0.532182	chr11:111333872	rs2003312	C	G	11:111333872_C/G	11	734	357	0.486376	111333872
chr11_111330777_G_A_b38	ENSG00000214290	-7.6052	2.43661e-13	2.50704e-10	-0.529366	chr11:111330777	rs7932421	G	A	11:111330777_G/A	11	734	350	0.476839	111330777
chr11_111331707_G_A_b38	ENSG00000214290	-7.6052	2.43661e-13	2.50704e-10	-0.529366	chr11:111331707	rs4512889	G	A	11:111331707_G/A	11	734	350	0.476839	111331707
chr11_111331761_C_T_b38	ENSG00000214290	-7.6052	2.43661e-13	2.50704e-10	-0.529366	chr11:111331761	rs1893990	C	T	11:111331761_C/T	11	734	350	0.476839	111331761
chr11_111336173_T_A_b38	ENSG00000214290	-7.6052	2.43661e-13	2.50704e-10	-0.529366	chr11:111336173	rs7946549	T	A	11:111336173_T/A	11	734	350	0.476839	111336173
chr11_111336380_G_A_b38	ENSG00000214290	-7.6052	2.43661e-13	2.50704e-10	-0.529366	chr11:111336380	rs7931938	G	A	11:111336380_G/A	11	734	350	0.476839	111336380
chr11_111337593_A_T_b38	ENSG00000214290	-7.6052	2.43661e-13	2.50704e-10	-0.529366	chr11:111337593	rs7116848	A	T	11:111337593_A/T	11	734	350	0.476839	111337593
chr11_111337793_T_C_b38	ENSG00000214290	-7.6052	2.43661e-13	2.50704e-10	-0.529366	chr11:111337793	rs1893993	T	C	11:111337793_T/C	11	734	350	0.476839	111337793
chr11_111338110_C_T_b38	ENSG00000214290	-7.6052	2.43661e-13	2.50704e-10	-0.529366	chr11:111338110	rs7117592	C	T	11:111338110_C/T	11	734	350	0.476839	111338110
chr11_111333268_A_T_b38	ENSG00000214290	-7.57973	2.88749e-13	2.9316e-10	-0.526191	chr11:111333268	rs2003313	A	T	11:111333268_A/T	11	734	351	0.478202	111333268
chr11_111382943_A_AGT_b38	ENSG00000214290	-7.38391	1.0512e-12	1.02975e-09	-0.524264	chr11:111382943	chr11:111382943	A	AGT	11:111382943_A/AGT	11	734	312	0.425068	111382943
chr11_111289904_A_C_b38	ENSG00000214290	7.08297	7.30571e-12	6.62732e-09	0.540423	chr11:111289904	rs17092444	A	C	11:111289904_A/C	11	734	178	0.242507	111289904
chr11_111292165_A_T_b38	ENSG00000214290	7.08297	7.30571e-12	6.62732e-09	0.540423	chr11:111292165	rs4356266	A	T	11:111292165_A/T	11	734	178	0.242507	111292165
chr11_111293072_A_G_b38	ENSG00000214290	7.08297	7.30571e-12	6.62732e-09	0.540423	chr11:111293072	rs78234435	A	G	11:111293072_A/G	11	734	178	0.242507	111293072
chr11_111293926_T_C_b38	ENSG00000214290	7.08297	7.30571e-12	6.62732e-09	0.540423	chr11:111293926	rs11213821	T	C	11:111293926_T/C	11	734	178	0.242507	111293926
chr11_111295215_G_T_b38	ENSG00000214290	7.08297	7.30571e-12	6.62732e-09	0.540423	chr11:111295215	rs10891244	G	T	11:111295215_G/T	11	734	178	0.242507	111295215
chr11_111298042_C_T_b38	ENSG00000214290	7.08297	7.30571e-12	6.62732e-09	0.540423	chr11:111298042	rs7127721	C	T	11:111298042_C/T	11	734	178	0.242507	111298042
chr11_111286858_AT_A_b38	ENSG00000214290	7.06126	8.38398e-12	7.51651e-09	0.537568	chr11:111286858	chr11:111286858	AT	A	11:111286858_AT/A	11	734	276	0.376022	111286858
chr11_111293388_C_A_b38	ENSG00000214290	7.06159	8.36617e-12	7.51651e-09	0.535287	chr11:111293388	rs56160097	C	A	11:111293388_C/A	11	734	180	0.245232	111293388
chr11_111297067_T_G_b38	ENSG00000214290	7.06159	8.36617e-12	7.51651e-09	0.535287	chr11:111297067	rs10891245	T	G	11:111297067_T/G	11	734	180	0.245232	111297067
chr11_111316873_A_G_b38	ENSG00000214290	-6.89201	2.42555e-11	2.06013e-08	-0.495773	chr11:111316873	rs12807413	A	G	11:111316873_A/G	11	734	266	0.362398	111316873
chr11_111389477_C_T_b38	ENSG00000214290	-6.82589	3.65443e-11	3.07829e-08	-0.474346	chr11:111389477	rs883326	C	T	11:111389477_C/T	11	734	344	0.468665	111389477
chr11_111313450_TA_T_b38	ENSG00000214290	-6.77733	4.92924e-11	4.10699e-08	-0.483799	chr11:111313450	chr11:111313450	TA	T	11:111313450_TA/T	11	734	276	0.376022	111313450
chr11_111314663_G_A_b38	ENSG00000214290	-6.77733	4.92924e-11	4.10699e-08	-0.483799	chr11:111314663	rs7938881	G	A	11:111314663_G/A	11	734	276	0.376022	111314663
chr11_111311727_G_T_b38	ENSG00000214290	-6.74913	5.86017e-11	4.70369e-08	-0.484409	chr11:111311727	rs10891248	G	T	11:111311727_G/T	11	734	267	0.36376	111311727
chr11_111311905_T_C_b38	ENSG00000214290	-6.74913	5.86017e-11	4.70369e-08	-0.484409	chr11:111311905	rs10891249	T	C	11:111311905_T/C	11	734	267	0.36376	111311905
chr11_111312967_C_T_b38	ENSG00000214290	-6.74913	5.86017e-11	4.70369e-08	-0.484409	chr11:111312967	rs10891250	C	T	11:111312967_C/T	11	734	267	0.36376	111312967
chr11_111313669_A_G_b38	ENSG00000214290	-6.74913	5.86017e-11	4.70369e-08	-0.484409	chr11:111313669	rs11213828	A	G	11:111313669_A/G	11	734	267	0.36376	111313669
chr11_111313948_T_C_b38	ENSG00000214290	-6.74913	5.86017e-11	4.70369e-08	-0.484409	chr11:111313948	rs11213829	T	C	11:111313948_T/C	11	734	267	0.36376	111313948
chr11_111314726_A_G_b38	ENSG00000214290	-6.74913	5.86017e-11	4.70369e-08	-0.484409	chr11:111314726	rs7938622	A	G	11:111314726_A/G	11	734	267	0.36376	111314726
chr11_111316185_G_A_b38	ENSG00000214290	-6.74913	5.86017e-11	4.70369e-08	-0.484409	chr11:111316185	rs10891253	G	A	11:111316185_G/A	11	734	267	0.36376	111316185
chr11_111317996_T_C_b38	ENSG00000214290	-6.70275	7.78029e-11	6.11679e-08	-0.480802	chr11:111317996	rs10891255	T	C	11:111317996_T/C	11	734	266	0.362398	111317996
chr11_111318433_A_G_b38	ENSG00000214290	-6.70275	7.78029e-11	6.11679e-08	-0.480802	chr11:111318433	rs10749971	A	G	11:111318433_A/G	11	734	266	0.362398	111318433
chr11_111318709_A_T_b38	ENSG00000214290	-6.70275	7.78029e-11	6.11679e-08	-0.480802	chr11:111318709	rs10749972	A	T	11:111318709_A/T	11	734	266	0.362398	111318709
chr11_111318718_A_G_b38	ENSG00000214290	-6.70275	7.78029e-11	6.11679e-08	-0.480802	chr11:111318718	rs10749973	A	G	11:111318718_A/G	11	734	266	0.362398	111318718
chr11_111320365_A_C_b38	ENSG00000214290	-6.70275	7.78029e-11	6.11679e-08	-0.480802	chr11:111320365	rs2002180	A	C	11:111320365_A/C	11	734	266	0.362398	111320365
chr11_111268350_A_G_b38	ENSG00000214290	6.68568	8.63228e-11	6.7007e-08	0.521802	chr11:111268350	rs9633936	A	G	11:111268350_A/G	11	734	167	0.22752	111268350
chr11_111269737_A_G_b38	ENSG00000214290	6.68568	8.63228e-11	6.7007e-08	0.521802	chr11:111269737	rs10891240	A	G	11:111269737_A/G	11	734	167	0.22752	111269737
chr11_111271053_T_C_b38	ENSG00000214290	6.68568	8.63228e-11	6.7007e-08	0.521802	chr11:111271053	rs34926143	T	C	11:111271053_T/C	11	734	167	0.22752	111271053
chr11_111275991_T_C_b38	ENSG00000214290	6.68568	8.63228e-11	6.7007e-08	0.521802	chr11:111275991	rs10789821	T	C	11:111275991_T/C	11	734	167	0.22752	111275991
chr11_111289670_G_A_b38	ENSG00000214290	6.57814	1.65408e-10	1.21915e-07	0.514835	chr11:111289670	rs12577869	G	A	11:111289670_G/A	11	734	164	0.223433	111289670
chr11_111301339_C_G_b38	ENSG00000214290	6.56176	1.82505e-10	1.32918e-07	0.509312	chr11:111301339	rs12575395	C	G	11:111301339_C/G	11	734	169	0.230245	111301339
chr11_111303258_GAC_G_b38	ENSG00000214290	6.56176	1.82505e-10	1.32918e-07	0.509312	chr11:111303258	rs3833764	GAC	G	11:111303258_GAC/G	11	734	169	0.230245	111303258
chr11_111304031_C_A_b38	ENSG00000214290	6.56176	1.82505e-10	1.32918e-07	0.509312	chr11:111304031	rs7123095	C	A	11:111304031_C/A	11	734	169	0.230245	111304031
chr11_111281538_ACT_A_b38	ENSG00000214290	6.53182	2.18357e-10	1.58277e-07	0.507374	chr11:111281538	chr11:111281538	ACT	A	11:111281538_ACT/A	11	734	168	0.228883	111281538
chr11_111281664_G_T_b38	ENSG00000214290	6.53182	2.18357e-10	1.58277e-07	0.507374	chr11:111281664	rs4636709	G	T	11:111281664_G/T	11	734	168	0.228883	111281664
chr11_111248595_A_G_b38	ENSG00000214290	6.50037	2.63428e-10	1.90049e-07	0.522696	chr11:111248595	rs11213800	A	G	11:111248595_A/G	11	734	155	0.211172	111248595
chr11_111252970_A_G_b38	ENSG00000214290	6.4815	2.94731e-10	2.11141e-07	0.521955	chr11:111252970	rs11213802	A	G	11:111252970_A/G	11	734	153	0.208447	111252970
chr11_111253762_T_C_b38	ENSG00000214290	6.4815	2.94731e-10	2.11141e-07	0.521955	chr11:111253762	rs1986684	T	C	11:111253762_T/C	11	734	153	0.208447	111253762
chr11_111343907_A_G_b38	ENSG00000214290	-6.44678	3.62148e-10	2.57633e-07	-0.451594	chr11:111343907	rs11213841	A	G	11:111343907_A/G	11	734	279	0.380109	111343907
chr11_111246759_T_C_b38	ENSG00000214290	6.44478	3.66466e-10	2.60101e-07	0.518392	chr11:111246759	rs11213798	T	C	11:111246759_T/C	11	734	156	0.212534	111246759
chr11_111330441_C_A_b38	ENSG00000214290	-6.42897	4.02378e-10	2.82322e-07	-0.449496	chr11:111330441	rs7929013	C	A	11:111330441_C/A	11	734	285	0.388283	111330441
chr11_111331839_G_T_b38	ENSG00000214290	-6.42897	4.02378e-10	2.82322e-07	-0.449496	chr11:111331839	rs1893991	G	T	11:111331839_G/T	11	734	285	0.388283	111331839
chr11_111336956_G_C_b38	ENSG00000214290	-6.42897	4.02378e-10	2.82322e-07	-0.449496	chr11:111336956	rs4296070	G	C	11:111336956_G/C	11	734	285	0.388283	111336956
chr11_111338198_T_C_b38	ENSG00000214290	-6.42897	4.02378e-10	2.82322e-07	-0.449496	chr11:111338198	rs35349974	T	C	11:111338198_T/C	11	734	285	0.388283	111338198
chr11_111340909_C_A_b38	ENSG00000214290	-6.42897	4.02378e-10	2.82322e-07	-0.449496	chr11:111340909	rs12364442	C	A	11:111340909_C/A	11	734	285	0.388283	111340909
chr11_111246412_A_T_b38	ENSG00000214290	6.42625	4.08885e-10	2.85581e-07	0.526847	chr11:111246412	rs12803934	A	T	11:111246412_A/T	11	734	150	0.20436	111246412
chr11_111255290_C_G_b38	ENSG00000214290	6.42561	4.10437e-10	2.86013e-07	0.517601	chr11:111255290	rs11213803	C	G	11:111255290_C/G	11	734	154	0.209809	111255290
chr11_111350238_C_A_b38	ENSG00000214290	-6.4148	4.37492e-10	3.03486e-07	-0.45024	chr11:111350238	rs4641517	C	A	11:111350238_C/A	11	734	280	0.381471	111350238
chr11_111351988_G_A_b38	ENSG00000214290	-6.4148	4.37492e-10	3.03486e-07	-0.45024	chr11:111351988	rs10502143	G	A	11:111351988_G/A	11	734	280	0.381471	111351988
chr11_111331728_C_G_b38	ENSG00000214290	-6.41305	4.42011e-10	3.04555e-07	-0.438852	chr11:111331728	rs1893988	C	G	11:111331728_C/G	11	734	332	0.452316	111331728
chr11_111331753_A_G_b38	ENSG00000214290	-6.41305	4.42011e-10	3.04555e-07	-0.438852	chr11:111331753	rs1893989	A	G	11:111331753_A/G	11	734	332	0.452316	111331753
chr11_111336349_A_G_b38	ENSG00000214290	-6.41305	4.42011e-10	3.04555e-07	-0.438852	chr11:111336349	rs7931570	A	G	11:111336349_A/G	11	734	332	0.452316	111336349
chr11_111385943_C_T_b38	ENSG00000214290	-6.40689	4.58378e-10	3.15123e-07	-0.454671	chr11:111385943	rs7127806	C	T	11:111385943_C/T	11	734	263	0.358311	111385943
chr11_111310924_A_C_b38	ENSG00000214290	-6.39813	4.82645e-10	3.31064e-07	-0.46144	chr11:111310924	rs7130102	A	C	11:111310924_A/C	11	734	257	0.350136	111310924
chr11_111330344_G_C_b38	ENSG00000214290	-6.39466	4.92584e-10	3.37128e-07	-0.451508	chr11:111330344	rs7929076	G	C	11:111330344_G/C	11	734	280	0.381471	111330344
chr11_111348925_T_G_b38	ENSG00000214290	-6.39345	4.96102e-10	3.38779e-07	-0.448237	chr11:111348925	rs11213845	T	G	11:111348925_T/G	11	734	279	0.380109	111348925
chr11_111343219_G_A_b38	ENSG00000214290	-6.36262	5.94598e-10	4.01568e-07	-0.448282	chr11:111343219	rs12365324	G	A	11:111343219_G/A	11	734	282	0.384196	111343219
chr11_111326212_C_T_b38	ENSG00000214290	-6.2547	1.11479e-09	7.19599e-07	-0.419833	chr11:111326212	rs10891256	C	T	11:111326212_C/T	11	734	348	0.474114	111326212
chr11_111250395_C_T_b38	ENSG00000214290	6.21777	1.37973e-09	8.74721e-07	0.508645	chr11:111250395	rs7939539	C	T	11:111250395_C/T	11	734	147	0.200272	111250395
chr11_111333424_A_G_b38	ENSG00000214290	-6.19743	1.551e-09	9.68552e-07	-0.432241	chr11:111333424	rs2003314	A	G	11:111333424_A/G	11	734	295	0.401907	111333424
chr11_111266084_C_T_b38	ENSG00000214290	6.0163	4.34052e-09	2.50162e-06	0.470826	chr11:111266084	rs11213811	C	T	11:111266084_C/T	11	734	170	0.231608	111266084
chr11_111261286_CACACACAT_C_b38	ENSG00000214290	5.99386	4.9224e-09	2.80712e-06	0.502426	chr11:111261286	chr11:111261286	CACACACAT	C	11:111261286_CACACACAT/C	11	734	150	0.20436	111261286
chr11_111245754_G_A_b38	ENSG00000214290	5.96738	5.7081e-09	3.18215e-06	0.470367	chr11:111245754	rs1568202	G	A	11:111245754_G/A	11	734	172	0.234332	111245754
chr11_111247019_C_A_b38	ENSG00000214290	5.85919	1.03965e-08	5.45841e-06	0.469398	chr11:111247019	rs11213799	C	A	11:111247019_C/A	11	734	170	0.231608	111247019
chr11_111247113_C_T_b38	ENSG00000214290	5.85919	1.03965e-08	5.45841e-06	0.469398	chr11:111247113	rs35759288	C	T	11:111247113_C/T	11	734	170	0.231608	111247113
chr11_111305626_C_T_b38	ENSG00000214290	5.83592	1.18148e-08	6.15037e-06	0.451087	chr11:111305626	rs12792445	C	T	11:111305626_C/T	11	734	179	0.243869	111305626
chr11_111245075_T_TA_b38	ENSG00000214290	5.82314	1.26715e-08	6.57402e-06	0.423422	chr11:111245075	rs28595215	T	TA	11:111245075_T/TA	11	734	214	0.291553	111245075
chr11_111361534_C_T_b38	ENSG00000214290	-5.6632	3.01402e-08	1.51003e-05	-0.404372	chr11:111361534	rs1815949	C	T	11:111361534_C/T	11	734	268	0.365123	111361534
chr11_111250082_C_G_b38	ENSG00000214290	5.4389	9.83943e-08	4.61301e-05	0.420935	chr11:111250082	rs7939167	C	G	11:111250082_C/G	11	734	200	0.27248	111250082
chr11_111345616_C_A_b38	ENSG00000214290	5.39315	1.24674e-07	5.66321e-05	0.414254	chr11:111345616	rs59514954	C	A	11:111345616_C/A	11	734	223	0.303815	111345616
chr11_111341014_T_C_b38	ENSG00000214290	5.35881	1.4875e-07	6.60042e-05	0.411671	chr11:111341014	rs7116100	T	C	11:111341014_T/C	11	734	231	0.314714	111341014
chr11_111340067_A_T_b38	ENSG00000214290	5.30729	1.9355e-07	8.42972e-05	0.407659	chr11:111340067	rs7126039	A	T	11:111340067_A/T	11	734	230	0.313351	111340067
chr11_111341072_C_T_b38	ENSG00000214290	5.30729	1.9355e-07	8.42972e-05	0.407659	chr11:111341072	rs7130334	C	T	11:111341072_C/T	11	734	230	0.313351	111341072
chr11_111320015_AT_A_b38	ENSG00000214290	-5.29694	2.04018e-07	8.79814e-05	-0.371463	chr11:111320015	rs200050852	AT	A	11:111320015_AT/A	11	734	315	0.429155	111320015
chr11_111420812_C_A_b38	ENSG00000214290	5.27776	2.24875e-07	9.61645e-05	0.481354	chr11:111420812	rs61896853	C	A	11:111420812_C/A	11	734	153	0.208447	111420812
chr11_111344222_G_A_b38	ENSG00000214290	5.27432	2.2883e-07	9.77194e-05	0.406705	chr11:111344222	rs4938488	G	A	11:111344222_G/A	11	734	234	0.318801	111344222
chr11_111327051_C_T_b38	ENSG00000214290	5.23617	2.77458e-07	0.0001131	0.407295	chr11:111327051	rs7944798	C	T	11:111327051_C/T	11	734	219	0.298365	111327051
chr11_111342457_C_T_b38	ENSG00000214290	5.2256	2.92618e-07	0.000118209	0.401496	chr11:111342457	rs7104680	C	T	11:111342457_C/T	11	734	229	0.311989	111342457
chr11_111325955_T_C_b38	ENSG00000214290	-5.0427	7.24571e-07	0.000256244	-0.336192	chr11:111325955	rs7104509	T	C	11:111325955_T/C	11	734	332	0.452316	111325955
chr11_111427974_C_T_b38	ENSG00000214290	4.99035	9.34796e-07	0.000320965	0.473909	chr11:111427974	rs4938597	C	T	11:111427974_C/T	11	734	144	0.196185	111427974
chr11_111364595_G_T_b38	ENSG00000214290	4.9736	1.01372e-06	0.000345356	0.415762	chr11:111364595	rs45486198	G	T	11:111364595_G/T	11	734	152	0.207084	111364595
chr11_111346623_G_A_b38	ENSG00000214290	4.87963	1.59082e-06	0.000522236	0.399998	chr11:111346623	rs4144344	G	A	11:111346623_G/A	11	734	163	0.222071	111346623
chr11_111336155_T_C_b38	ENSG00000214290	4.87554	1.62213e-06	0.000530809	0.412389	chr11:111336155	rs17471196	T	C	11:111336155_T/C	11	734	148	0.201635	111336155
chr11_111338199_G_A_b38	ENSG00000214290	4.87554	1.62213e-06	0.000530809	0.412389	chr11:111338199	rs4938475	G	A	11:111338199_G/A	11	734	148	0.201635	111338199
chr11_111303892_T_TA_b38	ENSG00000214290	4.86773	1.68341e-06	0.000549688	0.42187	chr11:111303892	chr11:111303892	T	TA	11:111303892_T/TA	11	734	160	0.217984	111303892
chr11_111419757_G_T_b38	ENSG00000214290	4.84361	1.88732e-06	0.000609135	0.403038	chr11:111419757	rs57797362	G	T	11:111419757_G/T	11	734	217	0.29564	111419757
chr11_111411904_A_G_b38	ENSG00000214290	-4.82934	2.01893e-06	0.000650245	-0.40568	chr11:111411904	rs11213878	A	G	11:111411904_A/G	11	734	207	0.282016	111411904
chr11_111408402_G_A_b38	ENSG00000214290	4.79812	2.33856e-06	0.000751608	0.434595	chr11:111408402	rs56180416	G	A	11:111408402_G/A	11	734	159	0.216621	111408402
chr11_111404257_T_C_b38	ENSG00000214290	-4.78896	2.44126e-06	0.000782976	-0.360637	chr11:111404257	rs11213876	T	C	11:111404257_T/C	11	734	284	0.386921	111404257
chr11_111334213_A_G_b38	ENSG00000214290	4.77056	2.66074e-06	0.000841919	0.401445	chr11:111334213	rs12574149	A	G	11:111334213_A/G	11	734	158	0.215259	111334213
chr11_111341644_G_A_b38	ENSG00000214290	4.77056	2.66074e-06	0.000841919	0.401445	chr11:111341644	rs12785346	G	A	11:111341644_G/A	11	734	158	0.215259	111341644
chr11_111341841_C_A_b38	ENSG00000214290	4.77056	2.66074e-06	0.000841919	0.401445	chr11:111341841	rs56115808	C	A	11:111341841_C/A	11	734	158	0.215259	111341841
chr11_111342034_G_A_b38	ENSG00000214290	4.77056	2.66074e-06	0.000841919	0.401445	chr11:111342034	rs35389890	G	A	11:111342034_G/A	11	734	158	0.215259	111342034
chr11_111347175_T_G_b38	ENSG00000214290	4.75845	2.81553e-06	0.000886325	0.401167	chr11:111347175	rs35106034	T	G	11:111347175_T/G	11	734	155	0.211172	111347175
chr11_111347639_C_A_b38	ENSG00000214290	4.75845	2.81553e-06	0.000886325	0.401167	chr11:111347639	rs34999255	C	A	11:111347639_C/A	11	734	155	0.211172	111347639
chr11_111410197_A_G_b38	ENSG00000214290	4.74896	2.94277e-06	0.000924482	0.42637	chr11:111410197	rs6589230	A	G	11:111410197_A/G	11	734	160	0.217984	111410197
chr11_111404525_T_C_b38	ENSG00000214290	4.72324	3.31628e-06	0.00102813	0.427957	chr11:111404525	rs4938535	T	C	11:111404525_T/C	11	734	160	0.217984	111404525
chr11_111308329_A_G_b38	ENSG00000214290	-4.71918	3.37927e-06	0.00103714	-0.31797	chr11:111308329	rs3087587	A	G	11:111308329_A/G	11	734	366	0.498638	111308329
chr11_111327494_G_T_b38	ENSG00000214290	4.68893	3.88603e-06	0.001149	0.389235	chr11:111327494	rs4420303	G	T	11:111327494_G/T	11	734	157	0.213896	111327494
chr11_111402858_TTAA_T_b38	ENSG00000214290	-4.68668	3.92655e-06	0.00115875	-0.355999	chr11:111402858	chr11:111402858	TTAA	T	11:111402858_TTAA/T	11	734	281	0.382834	111402858
chr11_111350557_C_T_b38	ENSG00000214290	4.67459	4.15105e-06	0.00121101	0.393426	chr11:111350557	rs10502139	C	T	11:111350557_C/T	11	734	160	0.217984	111350557
chr11_111350665_T_A_b38	ENSG00000214290	4.67459	4.15105e-06	0.00121101	0.393426	chr11:111350665	rs10502140	T	A	11:111350665_T/A	11	734	160	0.217984	111350665
chr11_111348623_G_A_b38	ENSG00000214290	4.64068	4.84895e-06	0.00139079	0.387766	chr11:111348623	rs35971924	G	A	11:111348623_G/A	11	734	160	0.217984	111348623
chr11_111436183_C_T_b38	ENSG00000214290	4.62675	5.16743e-06	0.00147777	0.447286	chr11:111436183	rs7930326	C	T	11:111436183_C/T	11	734	141	0.192098	111436183
chr11_111405143_T_C_b38	ENSG00000214290	4.61348	5.48912e-06	0.00155693	0.391586	chr11:111405143	rs11213877	T	C	11:111405143_T/C	11	734	207	0.282016	111405143
chr11_111349443_G_A_b38	ENSG00000214290	4.58496	6.24723e-06	0.00169512	0.383183	chr11:111349443	rs7112282	G	A	11:111349443_G/A	11	734	161	0.219346	111349443
chr11_111411694_G_C_b38	ENSG00000214290	4.55692	7.08991e-06	0.00190857	0.426659	chr11:111411694	rs4938546	G	C	11:111411694_G/C	11	734	155	0.211172	111411694
chr11_111430319_G_A_b38	ENSG00000214290	4.52238	8.27876e-06	0.00219964	0.415501	chr11:111430319	rs10891268	G	A	11:111430319_G/A	11	734	156	0.212534	111430319
chr11_111348310_G_A_b38	ENSG00000214290	4.42563	1.27155e-05	0.00323278	0.335939	chr11:111348310	rs12577316	G	A	11:111348310_G/A	11	734	225	0.30654	111348310
chr11_111401675_C_T_b38	ENSG00000214290	4.38813	1.49856e-05	0.00373865	0.377128	chr11:111401675	rs17577003	C	T	11:111401675_C/T	11	734	183	0.249319	111401675
chr11_111410183_C_CT_b38	ENSG00000214290	-4.38791	1.50003e-05	0.00373926	-0.366645	chr11:111410183	chr11:111410183	C	CT	11:111410183_C/CT	11	734	257	0.350136	111410183
chr11_111351502_G_A_b38	ENSG00000214290	4.37068	1.61698e-05	0.00398544	0.346612	chr11:111351502	rs45611937	G	A	11:111351502_G/A	11	734	182	0.247956	111351502
chr11_111352680_G_A_b38	ENSG00000214290	4.37068	1.61698e-05	0.00398544	0.346612	chr11:111352680	rs11213847	G	A	11:111352680_G/A	11	734	182	0.247956	111352680
chr11_111352791_A_G_b38	ENSG00000214290	4.37068	1.61698e-05	0.00398544	0.346612	chr11:111352791	rs11825875	A	G	11:111352791_A/G	11	734	182	0.247956	111352791
chr11_111401376_G_A_b38	ENSG00000214290	4.34204	1.83099e-05	0.00445208	0.373411	chr11:111401376	rs4938532	G	A	11:111401376_G/A	11	734	180	0.245232	111401376
chr11_111401839_G_A_b38	ENSG00000214290	4.33229	1.90984e-05	0.00462545	0.369645	chr11:111401839	rs12362765	G	A	11:111401839_G/A	11	734	182	0.247956	111401839
chr11_111325894_G_A_b38	ENSG00000214290	4.32678	1.95581e-05	0.00472561	0.341218	chr11:111325894	rs4938459	G	A	11:111325894_G/A	11	734	192	0.26158	111325894
chr11_111405000_C_T_b38	ENSG00000214290	-4.30804	2.12026e-05	0.00508289	-0.325605	chr11:111405000	rs10891260	C	T	11:111405000_C/T	11	734	271	0.36921	111405000
chr11_111309445_T_C_b38	ENSG00000214290	-4.27924	2.39904e-05	0.00554316	-0.288067	chr11:111309445	rs2002560	T	C	11:111309445_T/C	11	734	353	0.480926	111309445
chr11_111412385_GTTTC_G_b38	ENSG00000214290	-4.27227	2.47155e-05	0.00570212	-0.319994	chr11:111412385	rs115959381	GTTTC	G	11:111412385_GTTTC/G	11	734	288	0.392371	111412385
chr11_111328474_C_T_b38	ENSG00000214290	4.24503	2.77566e-05	0.00636541	0.390519	chr11:111328474	rs34664097	C	T	11:111328474_C/T	11	734	124	0.168937	111328474
chr11_111278907_G_C_b38	ENSG00000214290	4.24482	2.77819e-05	0.00636646	0.298821	chr11:111278907	rs7934982	G	C	11:111278907_G/C	11	734	298	0.405995	111278907
chr11_111311005_G_A_b38	ENSG00000214290	4.2315	2.93969e-05	0.00669591	0.361121	chr11:111311005	rs11213826	G	A	11:111311005_G/A	11	734	158	0.215259	111311005
chr11_111401355_G_A_b38	ENSG00000214290	4.22681	2.99869e-05	0.00679107	0.364002	chr11:111401355	rs61896843	G	A	11:111401355_G/A	11	734	179	0.243869	111401355
chr11_111412872_A_G_b38	ENSG00000214290	-4.21263	3.18398e-05	0.00716779	-0.342523	chr11:111412872	rs11213880	A	G	11:111412872_A/G	11	734	215	0.292916	111412872
chr11_111308948_T_C_b38	ENSG00000214290	-4.19535	3.42461e-05	0.00764774	-0.280693	chr11:111308948	rs7930041	T	C	11:111308948_T/C	11	734	352	0.479564	111308948
chr11_111392423_C_T_b38	ENSG00000214290	4.14661	4.20002e-05	0.0090881	0.503243	chr11:111392423	rs113205403	C	T	11:111392423_C/T	11	734	68	0.0926431	111392423
chr11_111412945_A_C_b38	ENSG00000214290	-4.13771	4.35866e-05	0.00935873	-0.331273	chr11:111412945	rs11213881	A	C	11:111412945_A/C	11	734	222	0.302452	111412945
chr11_111415890_A_G_b38	ENSG00000214290	-4.13507	4.40684e-05	0.00944234	-0.335737	chr11:111415890	rs7127521	A	G	11:111415890_A/G	11	734	211	0.287466	111415890
chr11_111408176_G_C_b38	ENSG00000214290	-4.08668	5.38393e-05	0.0109851	-0.308165	chr11:111408176	rs10891262	G	C	11:111408176_G/C	11	734	276	0.376022	111408176
chr11_111283058_C_CTT_b38	ENSG00000214290	4.01317	7.2717e-05	0.0140492	0.33936	chr11:111283058	chr11:111283058	C	CTT	11:111283058_C/CTT	11	734	115	0.156676	111283058
chr11_111418745_G_C_b38	ENSG00000214290	-3.99946	7.68713e-05	0.0147496	-0.319603	chr11:111418745	rs12795129	G	C	11:111418745_G/C	11	734	217	0.29564	111418745
chr11_111530884_G_A_b38	ENSG00000214290	-3.99086	7.95889e-05	0.0152139	-0.423036	chr11:111530884	rs11602450	G	A	11:111530884_G/A	11	734	106	0.144414	111530884
chr11_111426574_C_T_b38	ENSG00000214290	-3.9816	8.26222e-05	0.0157446	-0.305025	chr11:111426574	rs2068856	C	T	11:111426574_C/T	11	734	292	0.39782	111426574
chr11_111261260_TACACAC_T_b38	ENSG00000214290	3.97219	8.5813e-05	0.0162716	0.335182	chr11:111261260	chr11:111261260	TACACAC	T	11:111261260_TACACAC/T	11	734	190	0.258856	111261260
chr11_111645817_A_AT_b38	ENSG00000214290	-3.91165	0.000109321	0.0201196	-1.07011	chr11:111645817	rs150065971	A	AT	11:111645817_A/AT	11	734	13	0.0177112	111645817
chr11_111825823_G_A_b38	ENSG00000214290	-3.91165	0.000109321	0.0201196	-1.07011	chr11:111825823	rs148806712	G	A	11:111825823_G/A	11	734	13	0.0177112	111825823
chr11_111382943_A_AGTGTGTGT_b38	ENSG00000214290	3.8972	0.000115768	0.021179	0.363718	chr11:111382943	chr11:111382943	A	AGTGTGTGT	11:111382943_A/AGTGTGTGT	11	734	123	0.167575	111382943
chr11_112245561_G_A_b38	ENSG00000214290	-3.88779	0.000120163	0.0219048	-1.10572	chr11:112245561	chr11:112245561	G	A	11:112245561_G/A	11	734	12	0.0163488	112245561
chr11_111265875_TA_T_b38	ENSG00000214290	-3.87487	0.000126452	0.0228204	-1.20401	chr11:111265875	rs201448592	TA	T	11:111265875_TA/T	11	734	10	0.013624	111265875
chr11_111325286_C_T_b38	ENSG00000214290	3.87222	0.000127782	0.0229929	0.334701	chr11:111325286	rs7107344	C	T	11:111325286_C/T	11	734	145	0.197548	111325286
chr11_111310408_G_A_b38	ENSG00000214290	-3.83902	0.000145576	0.0257712	-0.259749	chr11:111310408	rs7948150	G	A	11:111310408_G/A	11	734	351	0.478202	111310408
chr11_111419461_T_C_b38	ENSG00000214290	-3.82736	0.000152361	0.0267868	-0.30471	chr11:111419461	rs11213885	T	C	11:111419461_T/C	11	734	219	0.298365	111419461
chr11_111339368_CTT_C_b38	ENSG00000214290	3.82612	0.000153105	0.0268866	0.280333	chr11:111339368	chr11:111339368	CTT	C	11:111339368_CTT/C	11	734	286	0.389646	111339368
chr11_111340785_G_A_b38	ENSG00000214290	3.82612	0.000153105	0.0268866	0.280333	chr11:111340785	rs7130155	G	A	11:111340785_G/A	11	734	286	0.389646	111340785
chr11_111426618_TCA_T_b38	ENSG00000214290	3.80598	0.000165591	0.0281289	0.320644	chr11:111426618	chr11:111426618	TCA	T	11:111426618_TCA/T	11	734	218	0.297003	111426618
chr11_111283058_C_CT_b38	ENSG00000214290	-3.80448	0.000166559	0.0282776	-0.296477	chr11:111283058	chr11:111283058	C	CT	11:111283058_C/CT	11	734	151	0.205722	111283058
chr11_111340966_C_A_b38	ENSG00000214290	3.80317	0.000167412	0.0283596	0.278275	chr11:111340966	rs7130200	C	A	11:111340966_C/A	11	734	285	0.388283	111340966
chr11_111304313_TTAAA_T_b38	ENSG00000214290	3.79857	0.000170425	0.0287855	0.297593	chr11:111304313	chr11:111304313	TTAAA	T	11:111304313_TTAAA/T	11	734	197	0.268392	111304313
chr11_111284577_C_T_b38	ENSG00000214290	3.79259	0.000174422	0.0293525	0.29311	chr11:111284577	rs7930251	C	T	11:111284577_C/T	11	734	223	0.303815	111284577
chr11_111312968_G_A_b38	ENSG00000214290	3.78328	0.000180822	0.0298202	0.325583	chr11:111312968	rs10891251	G	A	11:111312968_G/A	11	734	152	0.207084	111312968
chr11_111314088_G_T_b38	ENSG00000214290	3.78328	0.000180822	0.0298202	0.325583	chr11:111314088	rs7113243	G	T	11:111314088_G/T	11	734	152	0.207084	111314088
chr11_111318543_G_A_b38	ENSG00000214290	3.78328	0.000180822	0.0298202	0.325583	chr11:111318543	rs35201780	G	A	11:111318543_G/A	11	734	152	0.207084	111318543
chr11_111323172_C_T_b38	ENSG00000214290	3.78328	0.000180822	0.0298202	0.325583	chr11:111323172	rs11213833	C	T	11:111323172_C/T	11	734	152	0.207084	111323172
chr11_111323177_C_T_b38	ENSG00000214290	3.78339	0.000180746	0.0298202	0.325816	chr11:111323177	rs11213834	C	T	11:111323177_C/T	11	734	151	0.205722	111323177
chr11_111891089_GGT_G_b38	ENSG00000214290	3.77134	0.000189361	0.0309822	0.612844	chr11:111891089	chr11:111891089	GGT	G	11:111891089_GGT/G	11	734	40	0.0544959	111891089
chr11_111314720_T_C_b38	ENSG00000214290	3.74837	0.000206857	0.0335583	0.32062	chr11:111314720	rs10891252	T	C	11:111314720_T/C	11	734	150	0.20436	111314720
chr11_111290416_C_T_b38	ENSG00000214290	3.74592	0.000208807	0.0337497	0.289442	chr11:111290416	rs4533073	C	T	11:111290416_C/T	11	734	222	0.302452	111290416
chr11_111291331_G_A_b38	ENSG00000214290	3.74592	0.000208807	0.0337497	0.289442	chr11:111291331	rs7942622	G	A	11:111291331_G/A	11	734	222	0.302452	111291331
chr11_111427997_T_C_b38	ENSG00000214290	3.73944	0.000214057	0.0344891	0.292494	chr11:111427997	rs4938599	T	C	11:111427997_T/C	11	734	273	0.371935	111427997
chr11_111308665_A_G_b38	ENSG00000214290	3.71921	0.000231267	0.0369203	0.282925	chr11:111308665	rs1046872	A	G	11:111308665_A/G	11	734	234	0.318801	111308665
chr11_111426193_G_A_b38	ENSG00000214290	3.71774	0.000232559	0.0370805	0.309525	chr11:111426193	rs4938590	G	A	11:111426193_G/A	11	734	221	0.30109	111426193
chr11_111247193_G_C_b38	ENSG00000214290	-3.69615	0.000252459	0.0398187	-0.438719	chr11:111247193	rs61896766	G	C	11:111247193_G/C	11	734	88	0.119891	111247193
chr11_111310395_C_T_b38	ENSG00000214290	-3.683	0.000265359	0.0415753	-0.250044	chr11:111310395	rs7947952	C	T	11:111310395_C/T	11	734	354	0.482289	111310395
chr11_111424537_C_T_b38	ENSG00000214290	3.64697	0.000303941	0.0462264	0.307513	chr11:111424537	rs4938583	C	T	11:111424537_C/T	11	734	217	0.29564	111424537
chr11_111404151_A_G_b38	ENSG00000214290	-3.63998	0.000312012	0.0473601	-0.269629	chr11:111404151	rs7121760	A	G	11:111404151_A/G	11	734	324	0.441417	111404151
chr11_111416620_G_A_b38	ENSG00000214290	-3.63635	0.000316276	0.0478414	-0.270894	chr11:111416620	rs4259858	G	A	11:111416620_G/A	11	734	334	0.455041	111416620
chr11_111311477_C_G_b38	ENSG00000214290	3.61611	0.000341119	0.0512455	0.302704	chr11:111311477	rs7130969	C	G	11:111311477_C/G	11	734	164	0.223433	111311477
chr11_111315928_C_T_b38	ENSG00000214290	3.61611	0.000341119	0.0512455	0.302704	chr11:111315928	rs12801181	C	T	11:111315928_C/T	11	734	164	0.223433	111315928
chr11_111319979_C_A_b38	ENSG00000214290	3.61611	0.000341119	0.0512455	0.302704	chr11:111319979	rs11213832	C	A	11:111319979_C/A	11	734	164	0.223433	111319979
chr11_111247192_A_AT_b38	ENSG00000214290	-3.61574	0.000341587	0.0512854	-0.427856	chr11:111247192	chr11:111247192	A	AT	11:111247192_A/AT	11	734	89	0.121253	111247192
chr11_111427573_A_G_b38	ENSG00000214290	3.61151	0.000347011	0.0517725	0.283749	chr11:111427573	rs4938594	A	G	11:111427573_A/G	11	734	275	0.374659	111427573
chr11_111415796_T_G_b38	ENSG00000214290	-3.59063	0.000374993	0.0548822	-0.266019	chr11:111415796	rs4261318	T	G	11:111415796_T/G	11	734	329	0.448229	111415796
chr11_111415804_C_G_b38	ENSG00000214290	-3.59063	0.000374993	0.0548822	-0.266019	chr11:111415804	rs4268541	C	G	11:111415804_C/G	11	734	329	0.448229	111415804
chr11_111443279_G_A_b38	ENSG00000214290	-3.57433	0.00039829	0.0576316	-0.298308	chr11:111443279	rs7107639	G	A	11:111443279_G/A	11	734	190	0.258856	111443279
chr11_111416210_A_G_b38	ENSG00000214290	-3.56861	0.000406786	0.0587223	-0.265056	chr11:111416210	rs10789827	A	G	11:111416210_A/G	11	734	330	0.449591	111416210
chr11_111416432_T_C_b38	ENSG00000214290	-3.56861	0.000406786	0.0587223	-0.265056	chr11:111416432	rs4415806	T	C	11:111416432_T/C	11	734	330	0.449591	111416432
chr11_111437668_C_T_b38	ENSG00000214290	-3.55846	0.000422281	0.060702	-0.297069	chr11:111437668	rs7115710	C	T	11:111437668_C/T	11	734	191	0.260218	111437668
chr11_111416635_GC_G_b38	ENSG00000214290	-3.54562	0.000442668	0.0632177	-0.262796	chr11:111416635	chr11:111416635	GC	G	11:111416635_GC/G	11	734	329	0.448229	111416635
chr11_111780649_A_G_b38	ENSG00000214290	3.53742	0.000456174	0.0648444	1.16081	chr11:111780649	chr11:111780649	A	G	11:111780649_A/G	11	734	9	0.0122616	111780649
chr11_111411329_T_C_b38	ENSG00000214290	-3.51864	0.000488546	0.068808	-0.263071	chr11:111411329	rs7115223	T	C	11:111411329_T/C	11	734	317	0.43188	111411329
chr11_111311177_CGT_C_b38	ENSG00000214290	3.47192	0.000578709	0.0792852	0.298429	chr11:111311177	rs145073421,rs199493648	CGT	C	11:111311177_CGT/C	11	734	159	0.216621	111311177
chr11_111297819_G_T_b38	ENSG00000214290	3.45598	0.000612853	0.0833671	0.622217	chr11:111297819	rs45583336	G	T	11:111297819_G/T	11	734	32	0.0435967	111297819
chr11_111428260_G_A_b38	ENSG00000214290	-3.45333	0.000618729	0.0840917	-0.281287	chr11:111428260	rs11213890	G	A	11:111428260_G/A	11	734	203	0.276567	111428260
chr11_111305833_T_C_b38	ENSG00000214290	-3.43932	0.000650568	0.0876035	-0.234084	chr11:111305833	rs11213824	T	C	11:111305833_T/C	11	734	318	0.433243	111305833
chr11_111262296_T_G_b38	ENSG00000214290	3.41581	0.00070748	0.0934683	0.803659	chr11:111262296	rs74811177	T	G	11:111262296_T/G	11	734	18	0.0245232	111262296
chr11_111421921_A_T_b38	ENSG00000214290	-3.40149	0.000744394	0.0972897	-0.468056	chr11:111421921	rs112891122	A	T	11:111421921_A/T	11	734	54	0.0735695	111421921
chr11_111345686_G_A_b38	ENSG00000214290	-3.39929	0.000750237	0.0978474	-0.256895	chr11:111345686	rs1986838	G	A	11:111345686_G/A	11	734	237	0.322888	111345686
chr11_111439424_T_G_b38	ENSG00000214290	-3.38262	0.000795773	0.101495	-0.602705	chr11:111439424	rs77111683	T	G	11:111439424_T/G	11	734	28	0.0381471	111439424
chr11_111464550_C_T_b38	ENSG00000214290	3.36528	0.000845895	0.105561	0.246405	chr11:111464550	rs4938648	C	T	11:111464550_C/T	11	734	279	0.380109	111464550
chr11_111425054_T_C_b38	ENSG00000214290	3.36022	0.000861057	0.107366	0.279529	chr11:111425054	rs4938586	T	C	11:111425054_T/C	11	734	225	0.30654	111425054
chr11_111380751_A_C_b38	ENSG00000214290	-3.34919	0.000895011	0.109901	-0.251841	chr11:111380751	rs4938510	A	C	11:111380751_A/C	11	734	244	0.332425	111380751
chr11_111430099_T_G_b38	ENSG00000214290	3.33441	0.000942443	0.114539	0.276721	chr11:111430099	rs4938608	T	G	11:111430099_T/G	11	734	244	0.332425	111430099
chr11_111427528_G_A_b38	ENSG00000214290	3.33245	0.000948918	0.115046	0.277519	chr11:111427528	rs4938593	G	A	11:111427528_G/A	11	734	226	0.307902	111427528
chr11_111448885_AC_A_b38	ENSG00000214290	-3.33143	0.000952276	0.115279	-0.246426	chr11:111448885	chr11:111448885	AC	A	11:111448885_AC/A	11	734	274	0.373297	111448885
chr11_111507073_TA_T_b38	ENSG00000214290	-3.323	0.000980659	0.117638	-0.658648	chr11:111507073	rs557250825	TA	T	11:111507073_TA/T	11	734	26	0.0354223	111507073
chr11_111312761_A_G_b38	ENSG00000214290	-3.31419	0.00101114	0.120681	-0.496859	chr11:111312761	rs74688869	A	G	11:111312761_A/G	11	734	46	0.0626703	111312761
chr11_111268939_T_C_b38	ENSG00000214290	3.30834	0.00103187	0.122768	0.267605	chr11:111268939	rs4628711	T	C	11:111268939_T/C	11	734	199	0.271117	111268939
chr11_111244547_G_A_b38	ENSG00000214290	-3.29721	0.00107239	0.126563	-0.247597	chr11:111244547	rs7115117	G	A	11:111244547_G/A	11	734	352	0.479564	111244547
chr11_111432651_TAAAG_T_b38	ENSG00000214290	-3.28197	0.00113029	0.132167	-0.263922	chr11:111432651	chr11:111432651	TAAAG	T	11:111432651_TAAAG/T	11	734	216	0.294278	111432651
chr11_112118892_C_A_b38	ENSG00000214290	-3.27919	0.00114117	0.132826	-0.605436	chr11:112118892	rs117334584	C	A	11:112118892_C/A	11	734	28	0.0381471	112118892
chr11_111430282_G_A_b38	ENSG00000214290	3.2566	0.00123313	0.141238	0.268926	chr11:111430282	rs10891267,rs386757480	G	A	11:111430282_G/A	11	734	232	0.316076	111430282
chr11_111263832_C_T_b38	ENSG00000214290	-3.25367	0.00124558	0.142113	-0.895675	chr11:111263832	rs117687862	C	T	11:111263832_C/T	11	734	13	0.0177112	111263832
chr11_111292932_A_T_b38	ENSG00000214290	3.25114	0.00125639	0.142308	0.259485	chr11:111292932	rs113959275	A	T	11:111292932_A/T	11	734	198	0.269755	111292932
chr11_111386344_G_A_b38	ENSG00000214290	-3.24398	0.00128749	0.145133	-0.245624	chr11:111386344	rs12800418	G	A	11:111386344_G/A	11	734	244	0.332425	111386344
chr11_111433473_C_G_b38	ENSG00000214290	-3.2437	0.00128873	0.145166	-0.26149	chr11:111433473	rs12807309	C	G	11:111433473_C/G	11	734	207	0.282016	111433473
chr11_111383758_C_A_b38	ENSG00000214290	-3.24345	0.0012898	0.14518	-0.275537	chr11:111383758	rs12806520	C	A	11:111383758_C/A	11	734	179	0.243869	111383758
chr11_111334485_C_G_b38	ENSG00000214290	3.24109	0.00130024	0.146301	0.294291	chr11:111334485	rs2001213	C	G	11:111334485_C/G	11	734	143	0.194823	111334485
chr11_111326968_A_G_b38	ENSG00000214290	3.23593	0.00132327	0.148132	0.293559	chr11:111326968	rs10789824	A	G	11:111326968_A/G	11	734	144	0.196185	111326968
chr11_111337256_G_C_b38	ENSG00000214290	3.23593	0.00132327	0.148132	0.293559	chr11:111337256	rs7113613	G	C	11:111337256_G/C	11	734	144	0.196185	111337256
chr11_111457336_T_A_b38	ENSG00000214290	-3.22748	0.00136186	0.151457	-0.300894	chr11:111457336	rs1944925	T	A	11:111457336_T/A	11	734	154	0.209809	111457336
chr11_111946111_AT_A_b38	ENSG00000214290	3.2257	0.00137011	0.151988	0.456568	chr11:111946111	chr11:111946111	AT	A	11:111946111_AT/A	11	734	56	0.0762943	111946111
chr11_111427372_C_T_b38	ENSG00000214290	3.2253	0.00137197	0.152125	0.267985	chr11:111427372	rs4938592	C	T	11:111427372_C/T	11	734	222	0.302452	111427372
chr11_111434036_C_A_b38	ENSG00000214290	3.22522	0.00137234	0.152125	0.249949	chr11:111434036	rs11213894	C	A	11:111434036_C/A	11	734	268	0.365123	111434036
chr11_111275075_A_C_b38	ENSG00000214290	3.20249	0.00148212	0.16095	0.259359	chr11:111275075	rs6589216,rs386757468	A	C	11:111275075_A/C	11	734	200	0.27248	111275075
chr11_111275085_T_C_b38	ENSG00000214290	3.20249	0.00148212	0.16095	0.259359	chr11:111275085	rs6589217	T	C	11:111275085_T/C	11	734	200	0.27248	111275085
chr11_111277823_A_G_b38	ENSG00000214290	3.20249	0.00148212	0.16095	0.259359	chr11:111277823	rs7108060	A	G	11:111277823_A/G	11	734	200	0.27248	111277823
chr11_111278029_G_A_b38	ENSG00000214290	3.20249	0.00148212	0.16095	0.259359	chr11:111278029	rs12421268	G	A	11:111278029_G/A	11	734	200	0.27248	111278029
chr11_111280373_G_A_b38	ENSG00000214290	3.20249	0.00148212	0.16095	0.259359	chr11:111280373	rs10891242	G	A	11:111280373_G/A	11	734	200	0.27248	111280373
chr11_111429076_T_G_b38	ENSG00000214290	3.19939	0.00149773	0.161813	0.265749	chr11:111429076	rs2156724	T	G	11:111429076_T/G	11	734	230	0.313351	111429076
chr11_111270951_C_T_b38	ENSG00000214290	3.18976	0.00154715	0.165866	0.258205	chr11:111270951	rs4309189	C	T	11:111270951_C/T	11	734	198	0.269755	111270951
chr11_111468155_C_T_b38	ENSG00000214290	3.18744	0.00155923	0.166695	0.234092	chr11:111468155	rs1789357	C	T	11:111468155_C/T	11	734	280	0.381471	111468155
chr11_111280862_C_A_b38	ENSG00000214290	3.18287	0.00158339	0.168105	0.257662	chr11:111280862	rs7121198	C	A	11:111280862_C/A	11	734	198	0.269755	111280862
chr11_111281022_C_T_b38	ENSG00000214290	3.18287	0.00158339	0.168105	0.257662	chr11:111281022	rs7121338	C	T	11:111281022_C/T	11	734	198	0.269755	111281022
chr11_111282658_G_A_b38	ENSG00000214290	3.18287	0.00158339	0.168105	0.257662	chr11:111282658	rs4245170	G	A	11:111282658_G/A	11	734	198	0.269755	111282658
chr11_111283007_AG_A_b38	ENSG00000214290	3.18287	0.00158339	0.168105	0.257662	chr11:111283007	chr11:111283007	AG	A	11:111283007_AG/A	11	734	198	0.269755	111283007
chr11_111283420_AG_A_b38	ENSG00000214290	3.18287	0.00158339	0.168105	0.257662	chr11:111283420	chr11:111283420	AG	A	11:111283420_AG/A	11	734	198	0.269755	111283420
chr11_111283625_T_C_b38	ENSG00000214290	3.18287	0.00158339	0.168105	0.257662	chr11:111283625	rs10891243	T	C	11:111283625_T/C	11	734	198	0.269755	111283625
chr11_111443996_C_T_b38	ENSG00000214290	-3.18256	0.00158504	0.168106	-0.264509	chr11:111443996	rs72645432	C	T	11:111443996_C/T	11	734	186	0.253406	111443996
chr11_111271196_G_A_b38	ENSG00000214290	3.18033	0.00159692	0.168762	0.259186	chr11:111271196	rs7478722	G	A	11:111271196_G/A	11	734	197	0.268392	111271196
chr11_111293695_T_G_b38	ENSG00000214290	-3.16766	0.00166622	0.172772	-0.710606	chr11:111293695	rs1054768	T	G	11:111293695_T/G	11	734	20	0.027248	111293695
chr11_111364059_CT_C_b38	ENSG00000214290	-3.16345	0.00168986	0.17475	-0.242506	chr11:111364059	chr11:111364059	CT	C	11:111364059_CT/C	11	734	237	0.322888	111364059
chr11_111348690_A_G_b38	ENSG00000214290	3.15617	0.00173142	0.178206	0.283321	chr11:111348690	rs4600249	A	G	11:111348690_A/G	11	734	147	0.200272	111348690
chr11_111462359_G_A_b38	ENSG00000214290	3.1485	0.00177629	0.181642	0.233936	chr11:111462359	rs12575592	G	A	11:111462359_G/A	11	734	276	0.376022	111462359
chr11_111283932_C_T_b38	ENSG00000214290	3.14552	0.001794	0.182635	0.253128	chr11:111283932	rs4938398	C	T	11:111283932_C/T	11	734	200	0.27248	111283932
chr11_111287885_T_C_b38	ENSG00000214290	3.1442	0.0018019	0.183246	0.251054	chr11:111287885	rs4938407	T	C	11:111287885_T/C	11	734	196	0.26703	111287885
chr11_111451661_G_A_b38	ENSG00000214290	-3.13537	0.00185554	0.18752	-0.25014	chr11:111451661	rs11213908	G	A	11:111451661_G/A	11	734	191	0.260218	111451661
chr11_111311177_C_CGT_b38	ENSG00000214290	-3.12618	0.00191294	0.191866	-0.245869	chr11:111311177	rs145073421,rs199493648	C	CGT	11:111311177_C/CGT	11	734	363	0.49455	111311177
chr11_111358240_T_C_b38	ENSG00000214290	-3.12572	0.00191581	0.192028	-0.243395	chr11:111358240	rs61896820	T	C	11:111358240_T/C	11	734	225	0.30654	111358240
chr11_111280183_T_C_b38	ENSG00000214290	3.1021	0.00207114	0.20439	0.251365	chr11:111280183	rs7925917	T	C	11:111280183_T/C	11	734	199	0.271117	111280183
chr11_111891089_GGTGTGT_G_b38	ENSG00000214290	-3.10185	0.00207285	0.204493	-0.531331	chr11:111891089	chr11:111891089	GGTGTGT	G	11:111891089_GGTGTGT/G	11	734	36	0.0490463	111891089
chr11_111454282_C_T_b38	ENSG00000214290	3.08877	0.00216384	0.211496	0.225344	chr11:111454282	rs61896868	C	T	11:111454282_C/T	11	734	257	0.350136	111454282
chr11_111271392_C_T_b38	ENSG00000214290	3.08416	0.00219675	0.213691	0.249949	chr11:111271392	rs1962445	C	T	11:111271392_C/T	11	734	199	0.271117	111271392
chr11_111274031_G_A_b38	ENSG00000214290	3.08416	0.00219675	0.213691	0.249949	chr11:111274031	rs10789819	G	A	11:111274031_G/A	11	734	199	0.271117	111274031
chr11_111274092_G_A_b38	ENSG00000214290	3.08416	0.00219675	0.213691	0.249949	chr11:111274092	rs10789820	G	A	11:111274092_G/A	11	734	199	0.271117	111274092
chr11_111275763_G_T_b38	ENSG00000214290	3.08416	0.00219675	0.213691	0.249949	chr11:111275763	rs4936377	G	T	11:111275763_G/T	11	734	199	0.271117	111275763
chr11_111248453_C_T_b38	ENSG00000214290	3.08271	0.00220722	0.214505	0.256409	chr11:111248453	rs4432059	C	T	11:111248453_C/T	11	734	183	0.249319	111248453
chr11_111390387_G_A_b38	ENSG00000214290	-3.0825	0.00220873	0.214516	-0.235185	chr11:111390387	rs11213871	G	A	11:111390387_G/A	11	734	222	0.302452	111390387
chr11_111394216_C_G_b38	ENSG00000214290	-3.07995	0.00222729	0.21584	-0.234847	chr11:111394216	rs1806294	C	G	11:111394216_C/G	11	734	221	0.30109	111394216
chr11_111482837_G_GAA_b38	ENSG00000214290	-3.07418	0.00226971	0.218844	-0.767227	chr11:111482837	chr11:111482837	G	GAA	11:111482837_G/GAA	11	734	16	0.0217984	111482837
chr11_111369208_C_T_b38	ENSG00000214290	3.07177	0.00228765	0.219676	0.29456	chr11:111369208	rs11213858	C	T	11:111369208_C/T	11	734	129	0.175749	111369208
chr11_111452359_G_A_b38	ENSG00000214290	-3.06829	0.0023137	0.221208	-0.275202	chr11:111452359	rs11213910	G	A	11:111452359_G/A	11	734	162	0.220708	111452359
chr11_111452321_G_A_b38	ENSG00000214290	3.06026	0.0023751	0.226024	0.223824	chr11:111452321	rs4936466	G	A	11:111452321_G/A	11	734	259	0.352861	111452321
chr11_111276868_C_T_b38	ENSG00000214290	3.05689	0.00240127	0.227867	0.247793	chr11:111276868	rs73556233	C	T	11:111276868_C/T	11	734	199	0.271117	111276868
chr11_111430057_T_G_b38	ENSG00000214290	3.05119	0.00244616	0.230778	0.245933	chr11:111430057	rs4936453	T	G	11:111430057_T/G	11	734	247	0.336512	111430057
chr11_111458299_TCCTAGGC_T_b38	ENSG00000214290	-3.04892	0.00246423	0.231596	-0.233489	chr11:111458299	chr11:111458299	TCCTAGGC	T	11:111458299_TCCTAGGC/T	11	734	253	0.344687	111458299
chr11_111358613_G_T_b38	ENSG00000214290	-3.04522	0.00249394	0.233806	-0.23756	chr11:111358613	rs61896826,rs386757471	G	T	11:111358613_G/T	11	734	217	0.29564	111358613
chr11_111317572_T_TTGTG_b38	ENSG00000214290	3.02817	0.00263536	0.241247	0.278372	chr11:111317572	chr11:111317572	T	TTGTG	11:111317572_T/TTGTG	11	734	151	0.205722	111317572
chr11_111428926_T_C_b38	ENSG00000214290	3.02833	0.00263401	0.241247	0.245526	chr11:111428926	rs2156722	T	C	11:111428926_T/C	11	734	246	0.33515	111428926
chr11_111460261_A_G_b38	ENSG00000214290	3.02523	0.0026605	0.242565	0.231719	chr11:111460261	rs9783376	A	G	11:111460261_A/G	11	734	253	0.344687	111460261
chr11_110766588_T_C_b38	ENSG00000214290	-3.02074	0.00269926	0.2445	-0.833177	chr11:110766588	rs118069550	T	C	11:110766588_T/C	11	734	13	0.0177112	110766588
chr11_111410341_G_A_b38	ENSG00000214290	-3.01738	0.00272861	0.24614	-0.3979	chr11:111410341	rs2213027	G	A	11:111410341_G/A	11	734	61	0.0831063	111410341
chr11_110267791_T_TA_b38	ENSG00000214290	3.01677	0.00273395	0.246404	0.662226	chr11:110267791	chr11:110267791	T	TA	11:110267791_T/TA	11	734	21	0.0286104	110267791
chr11_111468969_A_T_b38	ENSG00000214290	3.01552	0.002745	0.246893	0.221194	chr11:111468969	rs490486	A	T	11:111468969_A/T	11	734	282	0.384196	111468969
chr11_111365031_G_T_b38	ENSG00000214290	-3.0142	0.00275666	0.24765	-0.23679	chr11:111365031	rs1815945	G	T	11:111365031_G/T	11	734	227	0.309264	111365031
chr11_111733070_C_G_b38	ENSG00000214290	-3.01283	0.00276885	0.248381	-0.569432	chr11:111733070	rs75461705	C	G	11:111733070_C/G	11	734	29	0.0395095	111733070
chr11_111865258_G_A_b38	ENSG00000214290	-3.01283	0.00276885	0.248381	-0.569432	chr11:111865258	rs45574638	G	A	11:111865258_G/A	11	734	29	0.0395095	111865258
chr11_111894859_T_G_b38	ENSG00000214290	-3.01283	0.00276885	0.248381	-0.569432	chr11:111894859	rs146308904	T	G	11:111894859_T/G	11	734	29	0.0395095	111894859
chr11_111281253_A_T_b38	ENSG00000214290	3.01144	0.00278122	0.249066	0.243952	chr11:111281253	rs7121531	A	T	11:111281253_A/T	11	734	195	0.265668	111281253
chr11_111382943_AGT_A_b38	ENSG00000214290	3.00747	0.00281688	0.251366	0.25905	chr11:111382943	chr11:111382943	AGT	A	11:111382943_AGT/A	11	734	163	0.222071	111382943
chr11_111469727_C_T_b38	ENSG00000214290	3.00121	0.00287403	0.255574	0.210779	chr11:111469727	rs638089	C	T	11:111469727_C/T	11	734	353	0.480926	111469727
chr11_111378642_G_A_b38	ENSG00000214290	-3.00063	0.00287937	0.255739	-0.251596	chr11:111378642	rs6589227	G	A	11:111378642_G/A	11	734	181	0.246594	111378642
chr11_111355391_G_A_b38	ENSG00000214290	-2.99006	0.00297836	0.258885	-0.254974	chr11:111355391	rs7107546	G	A	11:111355391_G/A	11	734	170	0.231608	111355391
chr11_111332370_A_G_b38	ENSG00000214290	-2.9849	0.0030279	0.261784	-0.265652	chr11:111332370	rs7936766	A	G	11:111332370_A/G	11	734	149	0.202997	111332370
chr11_111254432_G_A_b38	ENSG00000214290	2.97906	0.00308474	0.264937	0.244731	chr11:111254432	rs2001753	G	A	11:111254432_G/A	11	734	194	0.264305	111254432
chr11_111631216_G_A_b38	ENSG00000214290	-2.97758	0.00309934	0.265596	-0.572048	chr11:111631216	rs77346371	G	A	11:111631216_G/A	11	734	28	0.0381471	111631216
chr11_111245911_T_C_b38	ENSG00000214290	2.9741	0.0031338	0.266682	0.244145	chr11:111245911	rs2358652	T	C	11:111245911_T/C	11	734	189	0.257493	111245911
chr11_111377789_C_G_b38	ENSG00000214290	-2.96612	0.00321433	0.271056	-0.25066	chr11:111377789	rs4622303	C	G	11:111377789_C/G	11	734	179	0.243869	111377789
chr11_111378269_C_G_b38	ENSG00000214290	-2.96612	0.00321433	0.271056	-0.25066	chr11:111378269	rs7107388	C	G	11:111378269_C/G	11	734	179	0.243869	111378269
chr11_111378501_T_C_b38	ENSG00000214290	-2.96612	0.00321433	0.271056	-0.25066	chr11:111378501	rs6589226	T	C	11:111378501_T/C	11	734	179	0.243869	111378501
chr11_111383076_T_TCTC_b38	ENSG00000214290	-2.96425	0.00323349	0.272066	-0.250455	chr11:111383076	rs34563638,rs78693071	T	TCTC	11:111383076_T/TCTC	11	734	184	0.250681	111383076
chr11_111372377_T_G_b38	ENSG00000214290	-2.95308	0.00334986	0.277953	-0.238254	chr11:111372377	rs4529910	T	G	11:111372377_T/G	11	734	203	0.276567	111372377
chr11_111355740_C_T_b38	ENSG00000214290	-2.94806	0.00340351	0.280673	-0.243717	chr11:111355740	rs10891258	C	T	11:111355740_C/T	11	734	182	0.247956	111355740
chr11_111467753_T_C_b38	ENSG00000214290	2.94401	0.00344728	0.283298	0.216009	chr11:111467753	rs651882	T	C	11:111467753_T/C	11	734	278	0.378747	111467753
chr11_111456041_TC_T_b38	ENSG00000214290	-2.93755	0.00351817	0.286589	-0.266757	chr11:111456041	chr11:111456041	TC	T	11:111456041_TC/T	11	734	157	0.213896	111456041
chr11_111360644_A_G_b38	ENSG00000214290	-2.92738	0.00363251	0.293491	-0.223361	chr11:111360644	rs2002367	A	G	11:111360644_A/G	11	734	243	0.331063	111360644
chr11_110806102_C_T_b38	ENSG00000214290	-2.92414	0.00366974	0.295637	-0.778892	chr11:110806102	rs117414310	C	T	11:110806102_C/T	11	734	14	0.0190736	110806102
chr11_111279859_C_T_b38	ENSG00000214290	2.92033	0.00371378	0.298322	0.236854	chr11:111279859	rs7938779	C	T	11:111279859_C/T	11	734	197	0.268392	111279859
chr11_111457220_A_G_b38	ENSG00000214290	2.91588	0.0037659	0.30015	0.217003	chr11:111457220	rs7121944	A	G	11:111457220_A/G	11	734	263	0.358311	111457220
chr11_111453827_C_T_b38	ENSG00000214290	-2.91219	0.0038097	0.302233	-0.271533	chr11:111453827	rs10891271	C	T	11:111453827_C/T	11	734	146	0.19891	111453827
chr11_111334480_C_T_b38	ENSG00000214290	-2.91113	0.0038223	0.302913	-0.253837	chr11:111334480	rs1806574	C	T	11:111334480_C/T	11	734	156	0.212534	111334480
chr11_111343998_T_C_b38	ENSG00000214290	-2.90748	0.00386614	0.305418	-0.253378	chr11:111343998	rs4938487	T	C	11:111343998_T/C	11	734	157	0.213896	111343998
chr11_111374108_C_A_b38	ENSG00000214290	-2.89989	0.00395887	0.310933	-0.221816	chr11:111374108	rs12799546	C	A	11:111374108_C/A	11	734	239	0.325613	111374108
chr11_111451688_C_T_b38	ENSG00000214290	-2.89983	0.00395959	0.310933	-0.260712	chr11:111451688	rs12360856	C	T	11:111451688_C/T	11	734	160	0.217984	111451688
chr11_111428613_G_A_b38	ENSG00000214290	2.89494	0.00402039	0.314322	0.235513	chr11:111428613	rs7130116	G	A	11:111428613_G/A	11	734	242	0.3297	111428613
chr11_111429042_G_A_b38	ENSG00000214290	2.89494	0.00402039	0.314322	0.235513	chr11:111429042	rs2156723	G	A	11:111429042_G/A	11	734	242	0.3297	111429042
chr11_111429789_G_A_b38	ENSG00000214290	2.89494	0.00402039	0.314322	0.235513	chr11:111429789	rs10891265	G	A	11:111429789_G/A	11	734	242	0.3297	111429789
chr11_111429940_T_TTTG_b38	ENSG00000214290	2.89494	0.00402039	0.314322	0.235513	chr11:111429940	rs113699141	T	TTTG	11:111429940_T/TTTG	11	734	242	0.3297	111429940
chr11_111148076_G_A_b38	ENSG00000214290	-2.87576	0.00426705	0.32676	-0.718842	chr11:111148076	rs73021558	G	A	11:111148076_G/A	11	734	16	0.0217984	111148076
chr11_111281157_C_T_b38	ENSG00000214290	2.8725	0.00431031	0.32851	0.235924	chr11:111281157	rs7121501	C	T	11:111281157_C/T	11	734	183	0.249319	111281157
chr11_111374618_T_G_b38	ENSG00000214290	-2.86656	0.00439026	0.332128	-0.220678	chr11:111374618	rs4938508	T	G	11:111374618_T/G	11	734	239	0.325613	111374618
chr11_111468254_C_T_b38	ENSG00000214290	-2.85209	0.00459044	0.341956	-0.223487	chr11:111468254	rs11213916	C	T	11:111468254_C/T	11	734	244	0.332425	111468254
chr11_111470685_G_C_b38	ENSG00000214290	-2.85209	0.00459044	0.341956	-0.223487	chr11:111470685	rs11213918	G	C	11:111470685_G/C	11	734	244	0.332425	111470685
chr11_111680121_C_CA_b38	ENSG00000214290	2.84959	0.00462583	0.343925	0.734763	chr11:111680121	chr11:111680121	C	CA	11:111680121_C/CA	11	734	15	0.020436	111680121
chr11_111288375_T_C_b38	ENSG00000214290	2.84548	0.00468469	0.346423	0.939264	chr11:111288375	rs74537960	T	C	11:111288375_T/C	11	734	9	0.0122616	111288375
chr11_110353489_C_T_b38	ENSG00000214290	2.83537	0.00483216	0.352064	0.206604	chr11:110353489	rs1784632	C	T	11:110353489_C/T	11	734	307	0.418256	110353489
chr11_111376107_T_A_b38	ENSG00000214290	-2.82617	0.00497001	0.355821	-0.241031	chr11:111376107	rs6589224	T	A	11:111376107_T/A	11	734	175	0.23842	111376107
chr11_111376136_T_C_b38	ENSG00000214290	-2.82617	0.00497001	0.355821	-0.241031	chr11:111376136	rs6589225	T	C	11:111376136_T/C	11	734	175	0.23842	111376136
chr11_111444201_G_A_b38	ENSG00000214290	-2.82616	0.00497016	0.355821	-0.212748	chr11:111444201	rs7934141,rs71057069,rs112214509,rs373008769	G	A	11:111444201_G/A	11	734	328	0.446866	111444201
chr11_111277682_A_G_b38	ENSG00000214290	2.82269	0.00502308	0.357682	0.231935	chr11:111277682	rs4938382	A	G	11:111277682_A/G	11	734	186	0.253406	111277682
chr11_111282537_A_G_b38	ENSG00000214290	2.82269	0.00502308	0.357682	0.231935	chr11:111282537	rs4936382	A	G	11:111282537_A/G	11	734	186	0.253406	111282537
chr11_111480459_T_C_b38	ENSG00000214290	-2.82179	0.0050369	0.357682	-0.207829	chr11:111480459	rs1944117	T	C	11:111480459_T/C	11	734	272	0.370572	111480459
chr11_110995066_T_C_b38	ENSG00000214290	-2.81719	0.00510814	0.360617	-0.930124	chr11:110995066	rs148701243	T	C	11:110995066_T/C	11	734	9	0.0122616	110995066
chr11_111253098_G_T_b38	ENSG00000214290	2.8118	0.00519256	0.363579	0.23129	chr11:111253098	rs6589215	G	T	11:111253098_G/T	11	734	194	0.264305	111253098
chr11_111328129_A_G_b38	ENSG00000214290	-2.8114	0.00519889	0.363582	-0.238845	chr11:111328129	rs10891257	A	G	11:111328129_A/G	11	734	163	0.222071	111328129
chr11_111328493_C_T_b38	ENSG00000214290	-2.8114	0.00519889	0.363582	-0.238845	chr11:111328493	rs6589221	C	T	11:111328493_C/T	11	734	163	0.222071	111328493
chr11_111337403_G_C_b38	ENSG00000214290	-2.8114	0.00519889	0.363582	-0.238845	chr11:111337403	rs4297502	G	C	11:111337403_G/C	11	734	163	0.222071	111337403
chr11_111488661_TCA_T_b38	ENSG00000214290	-2.80715	0.00526646	0.365995	-0.206493	chr11:111488661	chr11:111488661	TCA	T	11:111488661_TCA/T	11	734	271	0.36921	111488661
chr11_111312526_C_T_b38	ENSG00000214290	-2.80409	0.00531569	0.368581	-0.599945	chr11:111312526	rs61896808	C	T	11:111312526_C/T	11	734	20	0.027248	111312526
chr11_111457810_T_C_b38	ENSG00000214290	-2.80412	0.00531515	0.368581	-0.221981	chr11:111457810	rs10891273	T	C	11:111457810_T/C	11	734	241	0.328338	111457810
chr11_110262591_G_A_b38	ENSG00000214290	-2.79555	0.0054551	0.372394	-0.876984	chr11:110262591	rs77266005	G	A	11:110262591_G/A	11	734	10	0.013624	110262591
chr11_110469657_A_AT_b38	ENSG00000214290	2.79106	0.00552965	0.375408	0.588166	chr11:110469657	rs376730691	A	AT	11:110469657_A/AT	11	734	23	0.0313351	110469657
chr11_111475115_G_A_b38	ENSG00000214290	-2.78005	0.00571657	0.382536	-0.203085	chr11:111475115	rs4598705	G	A	11:111475115_G/A	11	734	274	0.373297	111475115
chr11_110347815_C_G_b38	ENSG00000214290	2.7794	0.00572782	0.382954	0.560344	chr11:110347815	rs55770928	C	G	11:110347815_C/G	11	734	23	0.0313351	110347815
chr11_111481307_G_A_b38	ENSG00000214290	-2.77681	0.0057727	0.384686	-0.205194	chr11:111481307	rs1944118	G	A	11:111481307_G/A	11	734	270	0.367847	111481307
chr11_110308833_CTT_C_b38	ENSG00000214290	2.77212	0.0058547	0.387299	0.796237	chr11:110308833	chr11:110308833	CTT	C	11:110308833_CTT/C	11	734	12	0.0163488	110308833
chr11_111302179_G_A_b38	ENSG00000214290	-2.7628	0.00602096	0.393229	-0.712849	chr11:111302179	rs45616333	G	A	11:111302179_G/A	11	734	15	0.020436	111302179
chr11_111511840_T_C_b38	ENSG00000214290	-2.7517	0.00622451	0.399287	-0.201617	chr11:111511840	rs4938723	T	C	11:111511840_T/C	11	734	276	0.376022	111511840
chr11_111358696_A_ACT_b38	ENSG00000214290	-2.74933	0.00626879	0.401106	-0.229343	chr11:111358696	rs71057061,rs145613971	A	ACT	11:111358696_A/ACT	11	734	178	0.242507	111358696
chr11_111429185_A_G_b38	ENSG00000214290	2.7456	0.00633902	0.403997	0.223372	chr11:111429185	rs2156725	A	G	11:111429185_A/G	11	734	241	0.328338	111429185
chr11_111429557_A_G_b38	ENSG00000214290	2.7456	0.00633902	0.403997	0.223372	chr11:111429557	rs10789835	A	G	11:111429557_A/G	11	734	241	0.328338	111429557
chr11_111429696_C_T_b38	ENSG00000214290	2.7456	0.00633902	0.403997	0.223372	chr11:111429696	rs10789836	C	T	11:111429696_C/T	11	734	241	0.328338	111429696
chr11_112173447_CT_C_b38	ENSG00000214290	2.739	0.00646487	0.407361	0.648015	chr11:112173447	chr11:112173447	CT	C	11:112173447_CT/C	11	734	18	0.0245232	112173447
chr11_111490215_G_A_b38	ENSG00000214290	-2.73707	0.00650213	0.408828	-0.202047	chr11:111490215	rs7113824	G	A	11:111490215_G/A	11	734	269	0.366485	111490215
chr11_111491941_AT_A_b38	ENSG00000214290	-2.73707	0.00650213	0.408828	-0.202047	chr11:111491941	chr11:111491941	AT	A	11:111491941_AT/A	11	734	269	0.366485	111491941
chr11_111461671_GC_G_b38	ENSG00000214290	-2.73193	0.00660247	0.413141	-0.214964	chr11:111461671	chr11:111461671	GC	G	11:111461671_GC/G	11	734	247	0.336512	111461671
chr11_111461675_T_A_b38	ENSG00000214290	-2.73193	0.00660247	0.413141	-0.214964	chr11:111461675	rs35181851,rs145151027	T	A	11:111461675_T/A	11	734	247	0.336512	111461675
chr11_111358619_G_C_b38	ENSG00000214290	-2.724	0.00675971	0.418408	-0.22897	chr11:111358619	rs12275110	G	C	11:111358619_G/C	11	734	177	0.241144	111358619
chr11_111304778_G_GA_b38	ENSG00000214290	2.71762	0.00688876	0.423118	0.279623	chr11:111304778	chr11:111304778	G	GA	11:111304778_G/GA	11	734	104	0.141689	111304778
chr11_111470564_C_T_b38	ENSG00000214290	-2.712	0.00700424	0.424783	-0.18999	chr11:111470564	rs7949444	C	T	11:111470564_C/T	11	734	351	0.478202	111470564
chr11_111377452_A_G_b38	ENSG00000214290	-2.70037	0.00724896	0.434617	-0.217696	chr11:111377452	rs4489781	A	G	11:111377452_A/G	11	734	193	0.262943	111377452
chr11_111358075_G_A_b38	ENSG00000214290	-2.69579	0.00734719	0.435651	-0.224912	chr11:111358075	rs11601107	G	A	11:111358075_G/A	11	734	181	0.246594	111358075
chr11_111358288_T_C_b38	ENSG00000214290	-2.68949	0.00748467	0.441124	-0.215264	chr11:111358288	rs61896822	T	C	11:111358288_T/C	11	734	189	0.257493	111358288
chr11_111372411_CT_C_b38	ENSG00000214290	-2.68916	0.00749175	0.441186	-0.22603	chr11:111372411	chr11:111372411	CT	C	11:111372411_CT/C	11	734	180	0.245232	111372411
chr11_111495735_T_C_b38	ENSG00000214290	-2.67595	0.00778764	0.451636	-0.1959	chr11:111495735	rs1944114	T	C	11:111495735_T/C	11	734	275	0.374659	111495735
chr11_111485682_T_C_b38	ENSG00000214290	-2.67071	0.00790787	0.453717	-0.197774	chr11:111485682	rs1944123	T	C	11:111485682_T/C	11	734	271	0.36921	111485682
chr11_111401283_G_A_b38	ENSG00000214290	2.66108	0.008133	0.459912	0.550291	chr11:111401283	rs143704091	G	A	11:111401283_G/A	11	734	24	0.0326975	111401283
chr11_111357325_C_T_b38	ENSG00000214290	-2.65348	0.00831493	0.462352	-0.223222	chr11:111357325	rs1815950	C	T	11:111357325_C/T	11	734	175	0.23842	111357325
chr11_111358247_T_C_b38	ENSG00000214290	-2.65348	0.00831493	0.462352	-0.223222	chr11:111358247	rs61896821	T	C	11:111358247_T/C	11	734	175	0.23842	111358247
chr11_111379925_A_G_b38	ENSG00000214290	-2.65275	0.0083325	0.463089	-0.213895	chr11:111379925	rs4356268	A	G	11:111379925_A/G	11	734	192	0.26158	111379925
chr11_111510637_C_CT_b38	ENSG00000214290	2.64819	0.00844355	0.463397	0.644195	chr11:111510637	chr11:111510637	C	CT	11:111510637_C/CT	11	734	17	0.0231608	111510637
chr11_111358745_T_C_b38	ENSG00000214290	-2.64373	0.00855344	0.465764	-0.222351	chr11:111358745	rs12282082,rs386757472	T	C	11:111358745_T/C	11	734	177	0.241144	111358745
chr11_111813251_T_C_b38	ENSG00000214290	2.63669	0.00872946	0.46865	0.680933	chr11:111813251	rs142192043	T	C	11:111813251_T/C	11	734	15	0.020436	111813251
chr11_111374349_A_G_b38	ENSG00000214290	-2.62124	0.00912746	0.476551	-0.223931	chr11:111374349	rs4245182	A	G	11:111374349_A/G	11	734	174	0.237057	111374349
chr11_111267707_G_A_b38	ENSG00000214290	-2.61384	0.00932364	0.481772	-0.694204	chr11:111267707	rs61896770	G	A	11:111267707_G/A	11	734	12	0.0163488	111267707
chr11_111508329_C_A_b38	ENSG00000214290	-2.61382	0.00932425	0.481772	-0.192515	chr11:111508329	rs7115263	C	A	11:111508329_C/A	11	734	275	0.374659	111508329
chr11_111516391_C_T_b38	ENSG00000214290	-2.61283	0.00935064	0.482585	-0.198069	chr11:111516391	rs2187388	C	T	11:111516391_C/T	11	734	257	0.350136	111516391
chr11_111386343_T_C_b38	ENSG00000214290	-2.61261	0.00935663	0.482731	-0.210754	chr11:111386343	rs12293898,rs386757475	T	C	11:111386343_T/C	11	734	193	0.262943	111386343
chr11_111379489_A_G_b38	ENSG00000214290	-2.61095	0.00940134	0.484386	-0.210622	chr11:111379489	rs3802843	A	G	11:111379489_A/G	11	734	193	0.262943	111379489
chr11_111372061_C_G_b38	ENSG00000214290	-2.60606	0.00953397	0.485073	-0.211675	chr11:111372061	rs369153712	C	G	11:111372061_C/G	11	734	193	0.262943	111372061
chr11_111476498_T_C_b38	ENSG00000214290	-2.60168	0.0096543	0.488715	-0.194037	chr11:111476498	rs1944121	T	C	11:111476498_T/C	11	734	253	0.344687	111476498
chr11_110540239_C_T_b38	ENSG00000214290	-2.5935	0.00988264	0.492969	-0.857666	chr11:110540239	rs61236451	C	T	11:110540239_C/T	11	734	9	0.0122616	110540239
chr11_110544233_G_T_b38	ENSG00000214290	-2.5935	0.00988264	0.492969	-0.857666	chr11:110544233	rs79475594	G	T	11:110544233_G/T	11	734	9	0.0122616	110544233
chr11_110555316_C_T_b38	ENSG00000214290	-2.5935	0.00988264	0.492969	-0.857666	chr11:110555316	rs58239806	C	T	11:110555316_C/T	11	734	9	0.0122616	110555316
chr11_110555700_T_G_b38	ENSG00000214290	-2.5935	0.00988264	0.492969	-0.857666	chr11:110555700	rs59741906	T	G	11:110555700_T/G	11	734	9	0.0122616	110555700
chr11_110564459_T_A_b38	ENSG00000214290	-2.5935	0.00988264	0.492969	-0.857666	chr11:110564459	rs78669670	T	A	11:110564459_T/A	11	734	9	0.0122616	110564459
chr11_110569633_AAAAC_A_b38	ENSG00000214290	-2.5935	0.00988264	0.492969	-0.857666	chr11:110569633	chr11:110569633	AAAAC	A	11:110569633_AAAAC/A	11	734	9	0.0122616	110569633
chr11_110588196_G_T_b38	ENSG00000214290	-2.5935	0.00988264	0.492969	-0.857666	chr11:110588196	rs116473385	G	T	11:110588196_G/T	11	734	9	0.0122616	110588196
chr11_111446197_G_A_b38	ENSG00000214290	-2.59334	0.00988737	0.492969	-0.343143	chr11:111446197	rs75918747	G	A	11:111446197_G/A	11	734	64	0.0871935	111446197
chr11_111462655_G_A_b38	ENSG00000214290	2.59237	0.00991458	0.492969	0.523344	chr11:111462655	rs112065305	G	A	11:111462655_G/A	11	734	23	0.0313351	111462655
chr11_111502378_A_G_b38	ENSG00000214290	-2.5961	0.00980977	0.492969	-0.190429	chr11:111502378	rs10891277	A	G	11:111502378_A/G	11	734	276	0.376022	111502378
chr11_111317491_A_T_b38	ENSG00000214290	2.58988	0.00998528	0.494369	0.558039	chr11:111317491	rs138219610	A	T	11:111317491_A/T	11	734	22	0.0299728	111317491
